# Supplementary material for: Synthesis of novel seven-membered carbasugars and evaluation of their glycosidase inhibition potentials
Source: Royal Society of Chemistry journal article supplement (doi:10.1039/d1ra00804h), 2021-01-01

## Supporting information

# Synthesis of Novel Seven-membered Carbasugars and Evaluation of their Glycosidase Inhibition Potential

Vignesh Athiyarath,<sup>a</sup> Naveen J. Roy,<sup>a</sup> A. T. V. Vijil<sup>a</sup> and Kana M. Sureshan<sup>\*a</sup>

<sup>a</sup>School of Chemistry, Indian Institute of Science Education and Research,

Thiruvananthapuram, Kerala-695 551 (India). E-mail: [kms@iisertvm.ac.in](mailto:kms@iisertvm.ac.in)

### **Single Crystal X-Ray Diffraction (SCXRD) Data:**

Data measurements were done at 298 K on a Bruker-KAPPA APEX II CCD diffractometer with graphite-monochromatized (MoK = 0.71073 Å) radiation. The X-ray data collection was analysed by SMART program (Bruker, version 5.631, 2004). All the data were corrected for Lorentzian, polarization and absorption effects using SAINTPLUS and SADABS programs (Bruker, 2004). SHELXT and SHELXL-2014 were used for structure solution and full matrix least-squares refinement on  $F^2$ .

**1. Table S1: Crystal data of Compound 15:** Compound 15 was crystallised from mixture of methanol:chloroform (1:19, v/v).

|                                   |                                                                                         |
|-----------------------------------|-----------------------------------------------------------------------------------------|
| CCDC No.                          | 2046641                                                                                 |
| Empirical formula                 | C <sub>16</sub> H <sub>34</sub> O <sub>9</sub>                                          |
| Formula weight                    | 370.43                                                                                  |
| Temperature                       | 296(2) K                                                                                |
| Wavelength                        | 0.71073 Å                                                                               |
| Crystal system                    | Monoclinic                                                                              |
| Space group                       | C 2                                                                                     |
| Unit cell dimensions              | a = 14.4368(11) Å, b = 4.9452(4) Å, c = 12.9747(10) Å, α = 90°, β = 94.740(4)°, γ = 90° |
| Volume                            | 923.13(12) Å <sup>3</sup>                                                               |
| Z                                 | 2                                                                                       |
| Density (calculated)              | 1.333 g/cm <sup>3</sup>                                                                 |
| Absorption coefficient            | 0.108 mm <sup>-1</sup>                                                                  |
| F(000)                            | 404                                                                                     |
| Crystal size                      | 0.250 x 0.100 x 0.100 mm <sup>3</sup>                                                   |
| Theta range for data collection   | 2.832 to 25.980°.                                                                       |
| Index ranges                      | -17<=h<=17, -5<=k<=6, -                                                                 |
| Reflections collected             | 3993                                                                                    |
| Independent reflections           | 1748 [R(int) = 0.1379]                                                                  |
| Completeness to theta =           | 99.9%                                                                                   |
| Absorption correction             | Semi-empirical from equivalents                                                         |
| Max. and min. transmission        | 0.9886 and 0.9719                                                                       |
| Refinement method                 | Full-matrix least-squares on F <sup>2</sup>                                             |
| Data / restraints / parameters    | 1748 / 2 / 124                                                                          |
| Goodness-of-fit on F <sup>2</sup> | 1.062                                                                                   |
| Final R indices [I>2sigma(I)]     | R1 = 0.0593, wR2 = 0.1522                                                               |
| R indices (all data)              | R1 = 0.0663, wR2 = 0.1570                                                               |
| Absolute structure parameter      | -2(2)                                                                                   |
| Largest diff. peak and hole       | 0.298 and -0.193 e.Å <sup>-3</sup>                                                      |

2. **Table S2.** Bond angles and torsional angles of the seven-membered ring of compound **15**.

| Sequence of atoms taken to calculate bond angle | Bond angle (°) | Sequence of atoms taken to calculate the torsional angle | Torsional angle (°) | Torsional angles of cycloheptane ring in a twist chair conformation |
|-------------------------------------------------|----------------|----------------------------------------------------------|---------------------|---------------------------------------------------------------------|
| C7-C1-C2                                        | 110.98         | C1-C2-C3-C4                                              | -35.25              | -39                                                                 |
| C1-C2-C3                                        | 119.14         | C2-C3-C4-C5                                              | -39.67              | -39                                                                 |
| C2-C3-C4                                        | 118.25         | C3-C4-C5-C6                                              | 82.85               | 88                                                                  |
| C3-C4-C5                                        | 115.19         | C4-C5-C6-C7                                              | -73.97              | -72                                                                 |
| C4-C5-C6                                        | 112.78         | C5-C6-C7-C1                                              | 61.28               | 54                                                                  |
| C5-C6-C7                                        | 116.43         | C6-C7-C1-C2                                              | -73.11              | -72                                                                 |
| C6-C7-C1                                        | 114.49         | C7-C1-C2-C3                                              | 82.55               | 88                                                                  |

3. **Table S3. Crystal Data of Compound 23:** Compound **23** was crystallised from a solution of 2% methanol/ethylacetate.

|                        |                                                                                       |
|------------------------|---------------------------------------------------------------------------------------|
| CCDC No.               | 2046642                                                                               |
| Empirical formula      | C <sub>15</sub> H <sub>22</sub> O <sub>6</sub>                                        |
| Formula weight         | 298.32                                                                                |
| Temperature            | 296(2) K                                                                              |
| Wavelength             | 0.71073 Å                                                                             |
| Crystal system         | Monoclinic                                                                            |
| Space group            | P 21                                                                                  |
| Unit cell dimensions   | a = 4.7565(2) Å, b = 25.9753(13) Å, c = 6.1401(3) Å, α = 90°, β = 94.072(3)°, γ = 90° |
| Volume                 | 756.70(6) Å <sup>3</sup>                                                              |
| Z                      | 2                                                                                     |
| Density (calculated)   | 1.309 g/cm <sup>3</sup>                                                               |
| Absorption coefficient | 0.101 mm <sup>-1</sup>                                                                |
| F(000)                 | 320                                                                                   |
| Crystal size           | 0.200 x 0.150 x 0.150 mm <sup>3</sup>                                                 |



|                                   |                                             |
|-----------------------------------|---------------------------------------------|
| Theta range for data collection   | 3.137 to 25.999°.                           |
| Index ranges                      | -5<=h<=5, -32<=k<=32, -                     |
| Reflections collected             | 6338                                        |
| Independent reflections           | 2695 [R(int) = 0.0171]                      |
| Completeness to theta = 25.242°   | 99.9%                                       |
| Absorption correction             | Semi-empirical from equivalents             |
| Max. and min. transmission        | 0.985 and 0.980                             |
| Refinement method                 | Full-matrix least-squares on F <sup>2</sup> |
| Data / restraints / parameters    | 2695 / 3 / 203                              |
| Goodness-of-fit on F <sup>2</sup> | 1.032                                       |
| Final R indices [I>2sigma(I)]     | R1 = 0.0446, wR2 = 0.1183                   |
| R indices (all data)              | R1 = 0.0509, wR2 = 0.1240                   |
| Absolute structure parameter      | 0.4(4)                                      |
| Extinction coefficient            | n/a                                         |
| Largest diff. peak and hole       | 0.581 and -0.201 e.Å <sup>-3</sup>          |

#### 4. NMR spectra

<sup>1</sup>H NMR spectra of mixture of diastereomers **12** (1:0.3 ratio) recorded in CDCl<sub>3</sub>

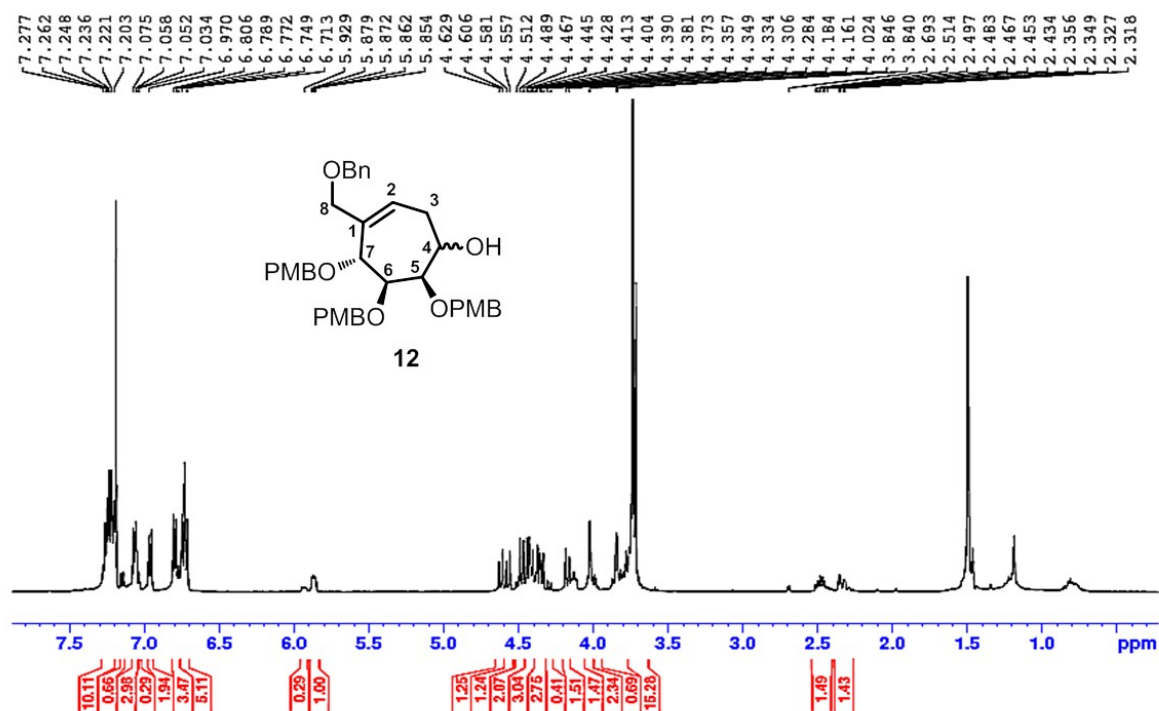

$^1\text{H}$  NMR spectrum of compound **13** recorded in  $\text{CDCl}_3$

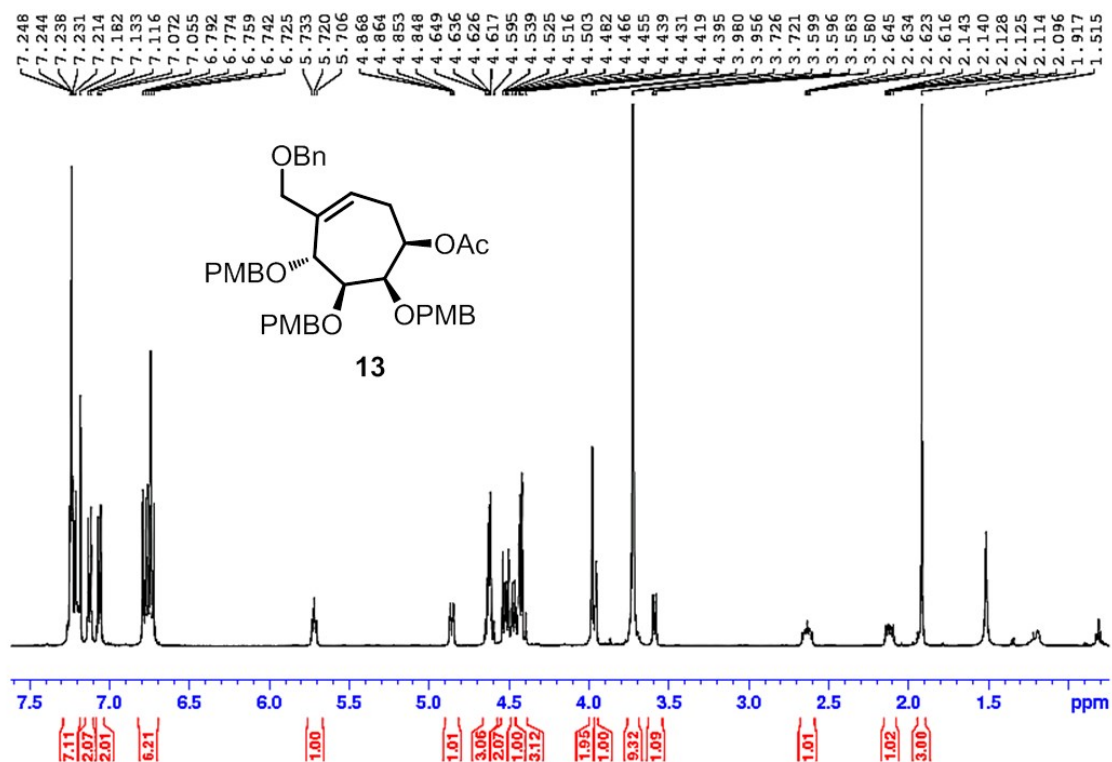

COSY spectrum of compound **13** recorded in  $\text{CDCl}_3$

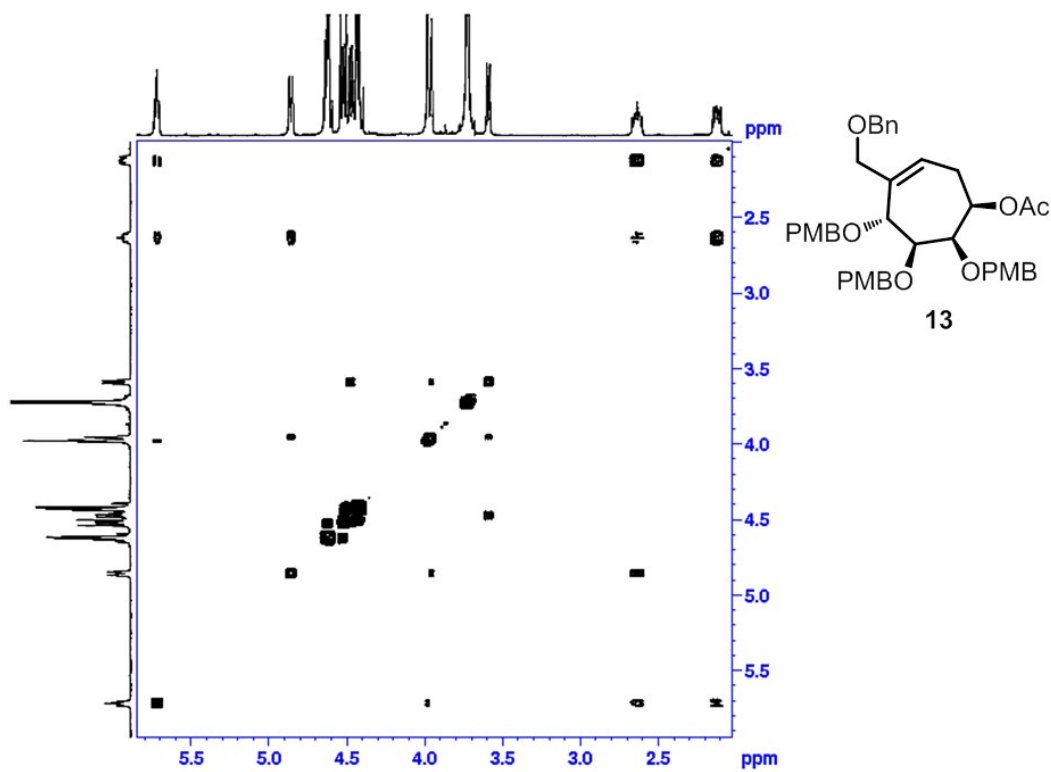

$^{13}\text{C}$  spectrum of **13** recorded in  $\text{CDCl}_3$

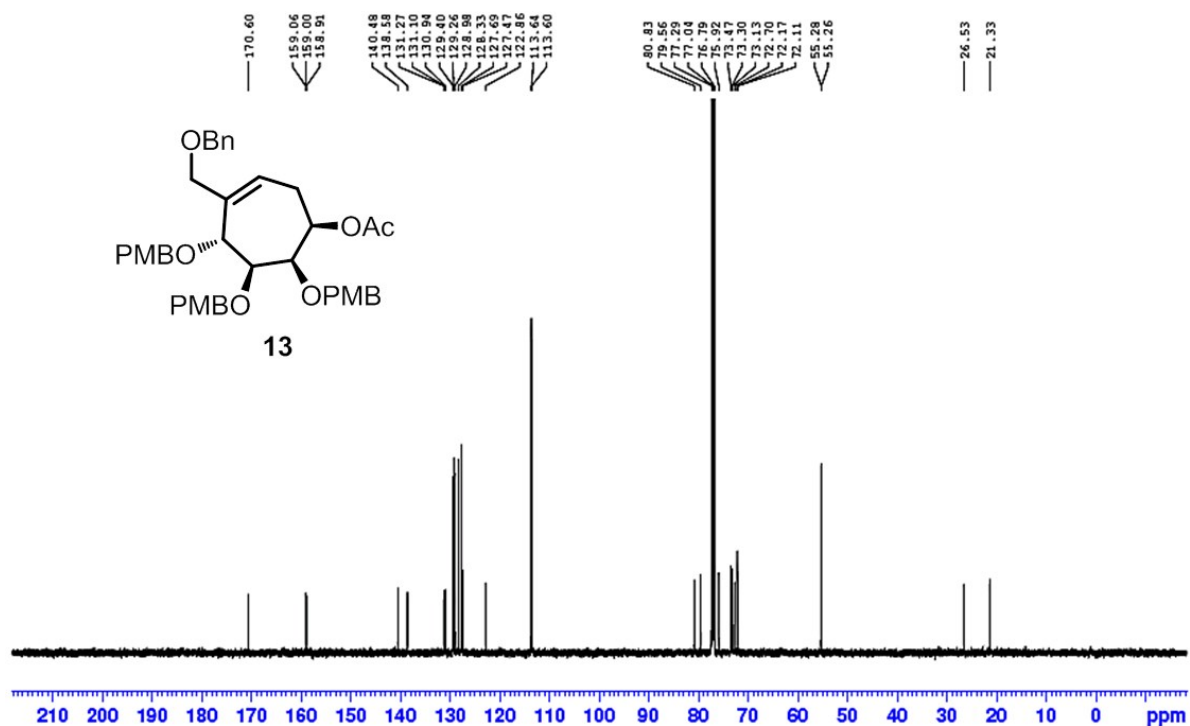

DEPT spectrum of compound **13** recorded in  $\text{CDCl}_3$

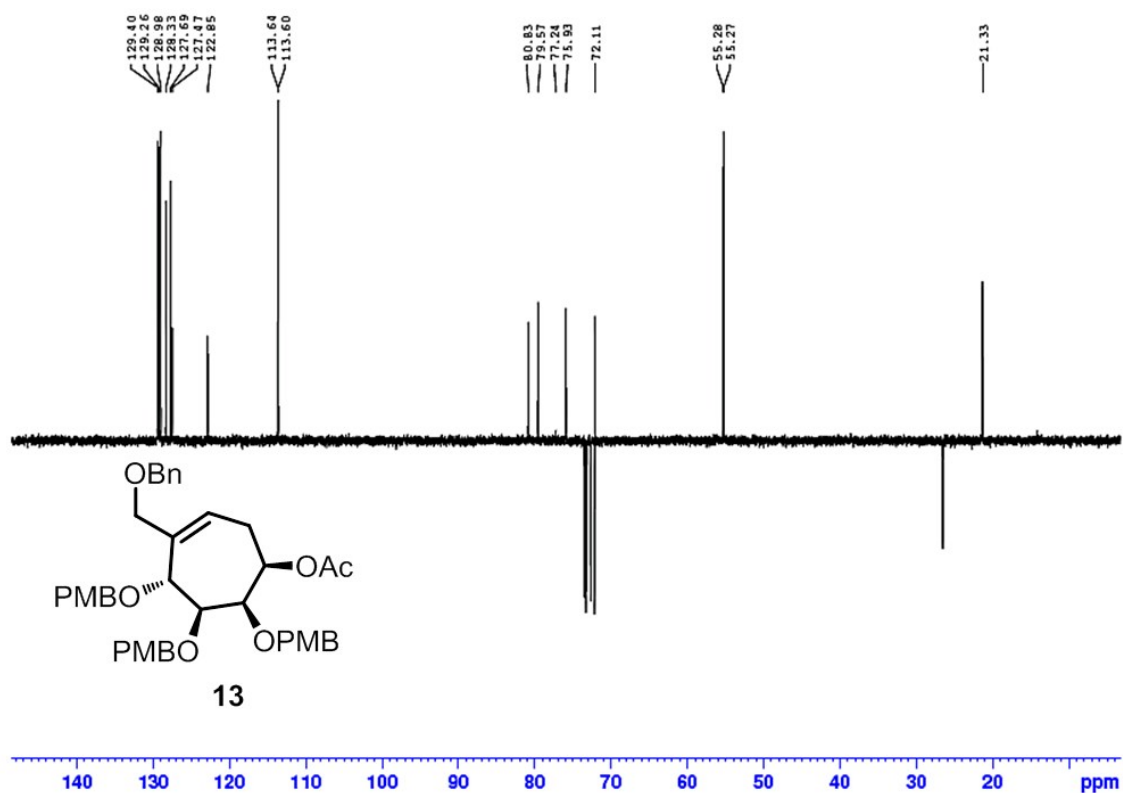

HMQC spectrum of compound **13** recorded in CDCl<sub>3</sub>

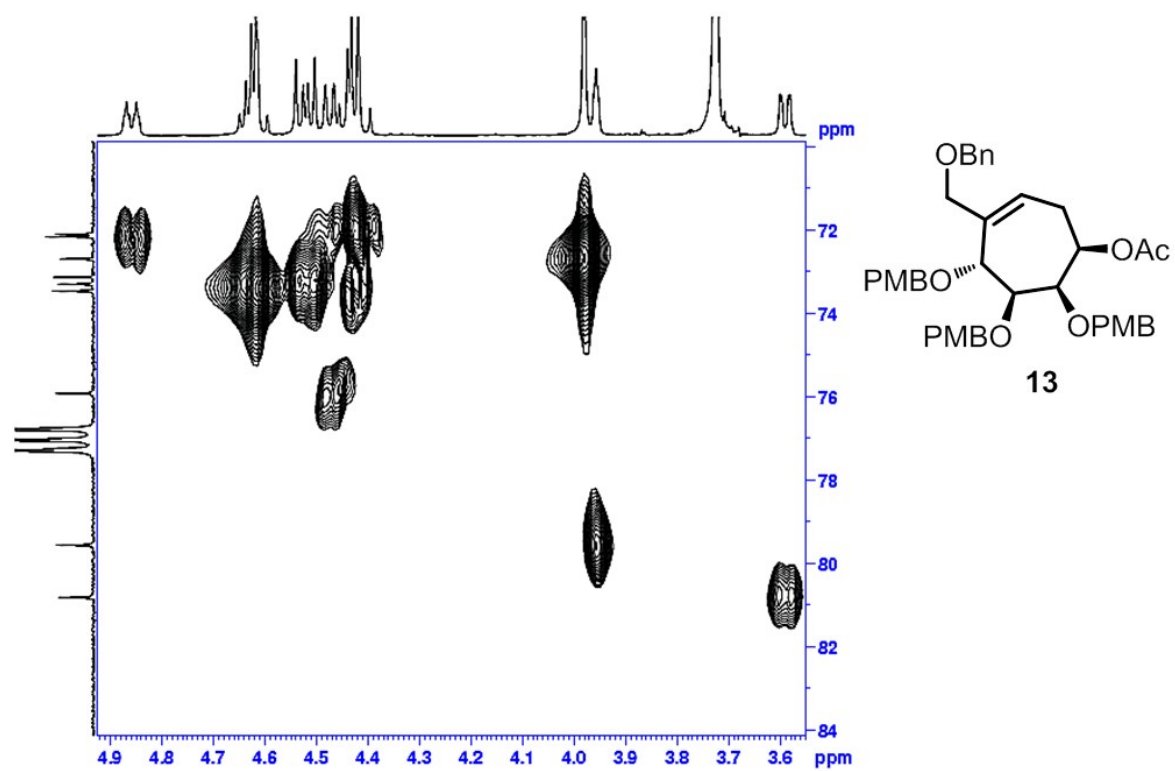

NOESY spectrum of compound **13** recorded in CDCl<sub>3</sub>

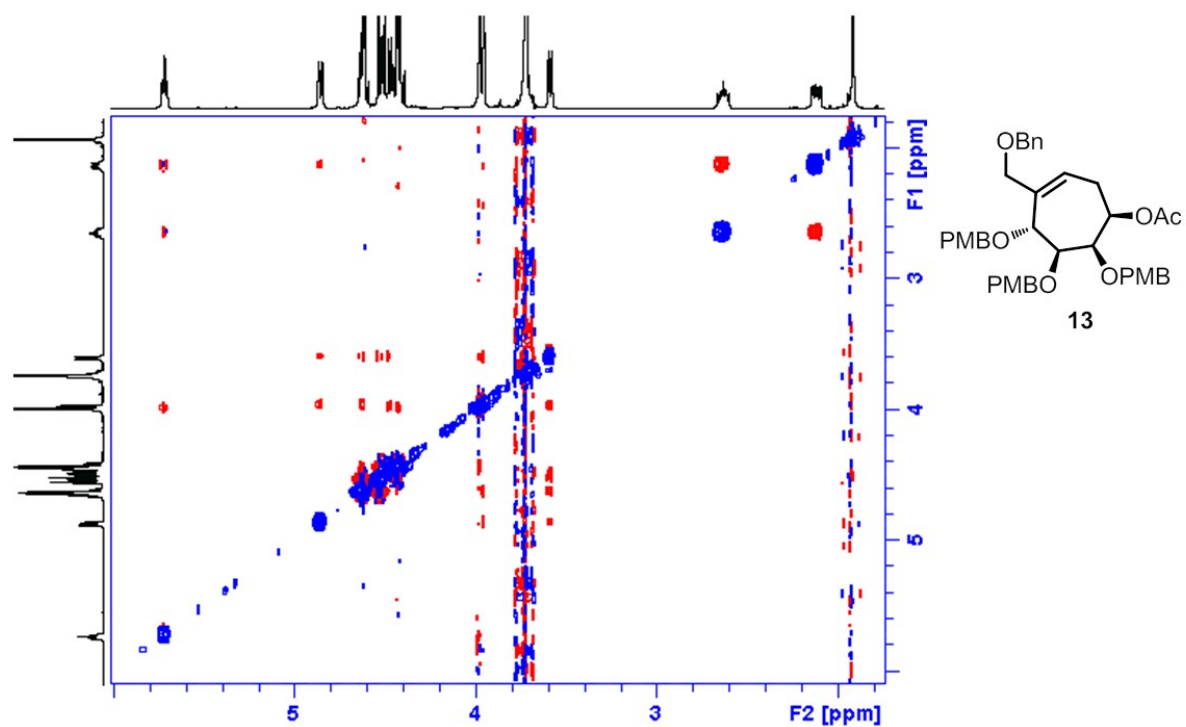

$^1\text{H}$  NMR spectrum of compound **14** recorded in  $\text{CDCl}_3$

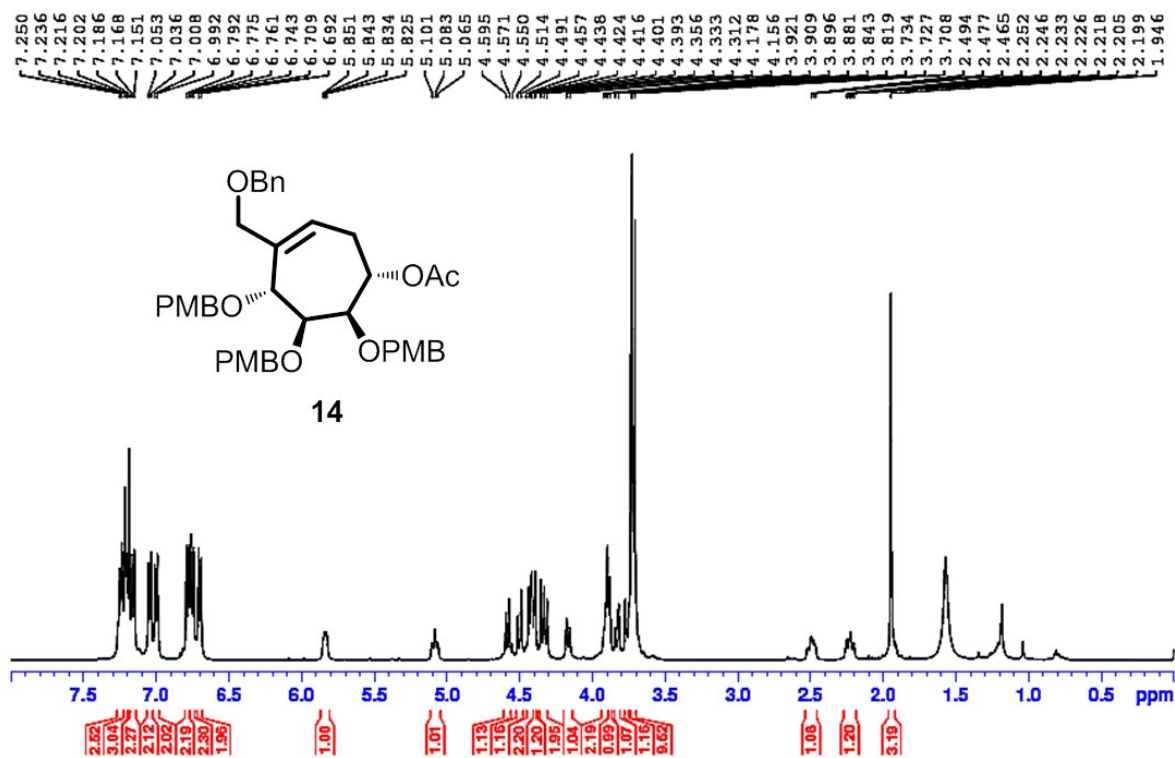

COSY spectrum of compound **14** recorded in  $\text{CDCl}_3$

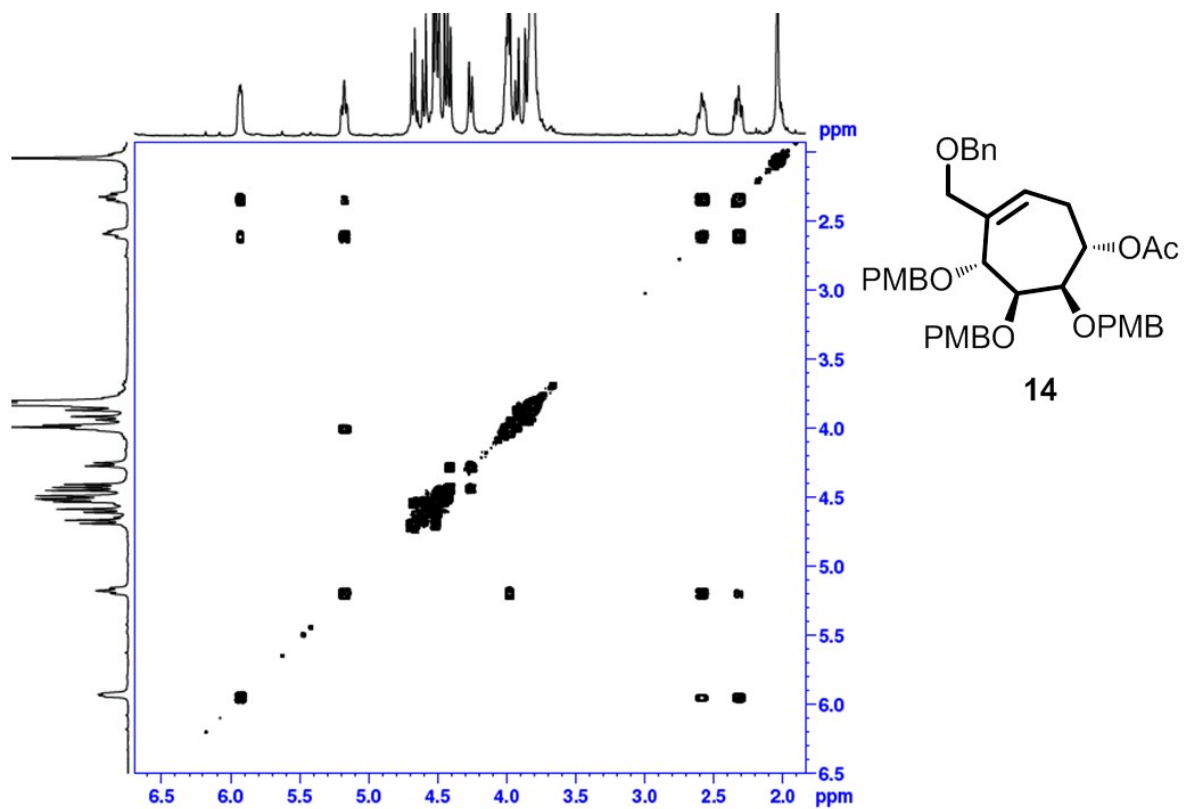

$^{13}\text{C}$  spectrum of compound **14** recorded in  $\text{CDCl}_3$

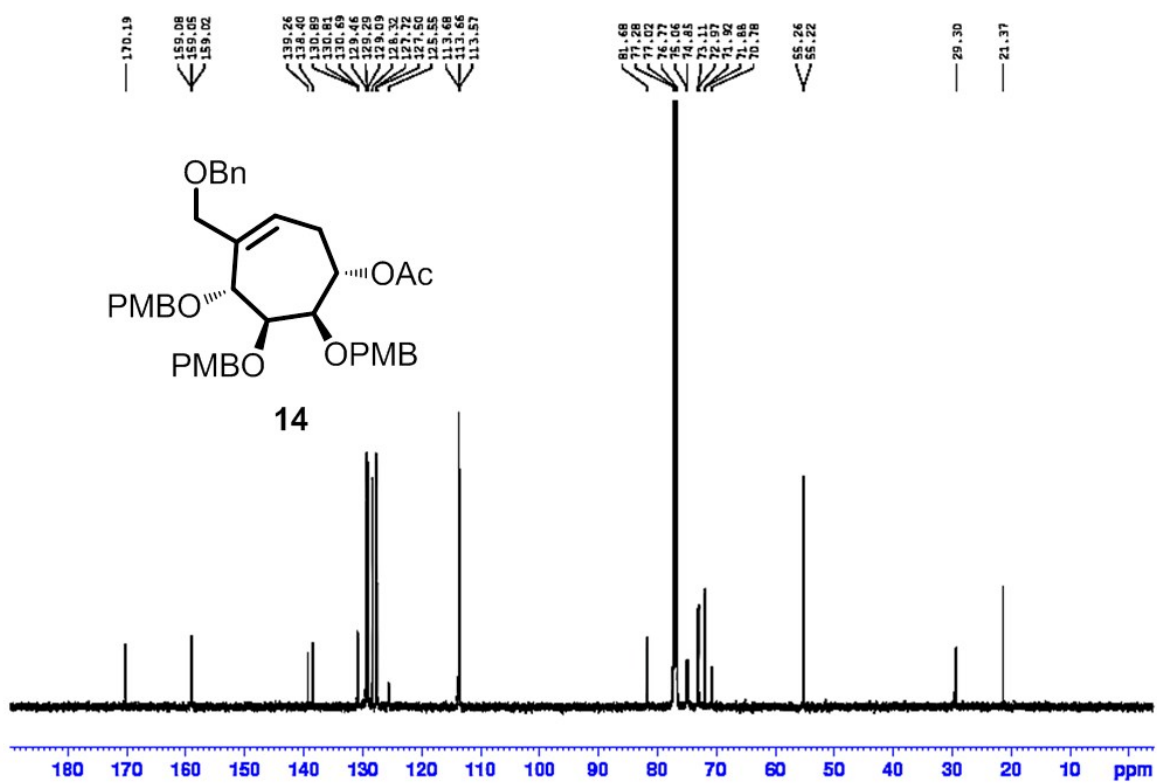

DEPT spectrum of compound **14** recorded in  $\text{CDCl}_3$

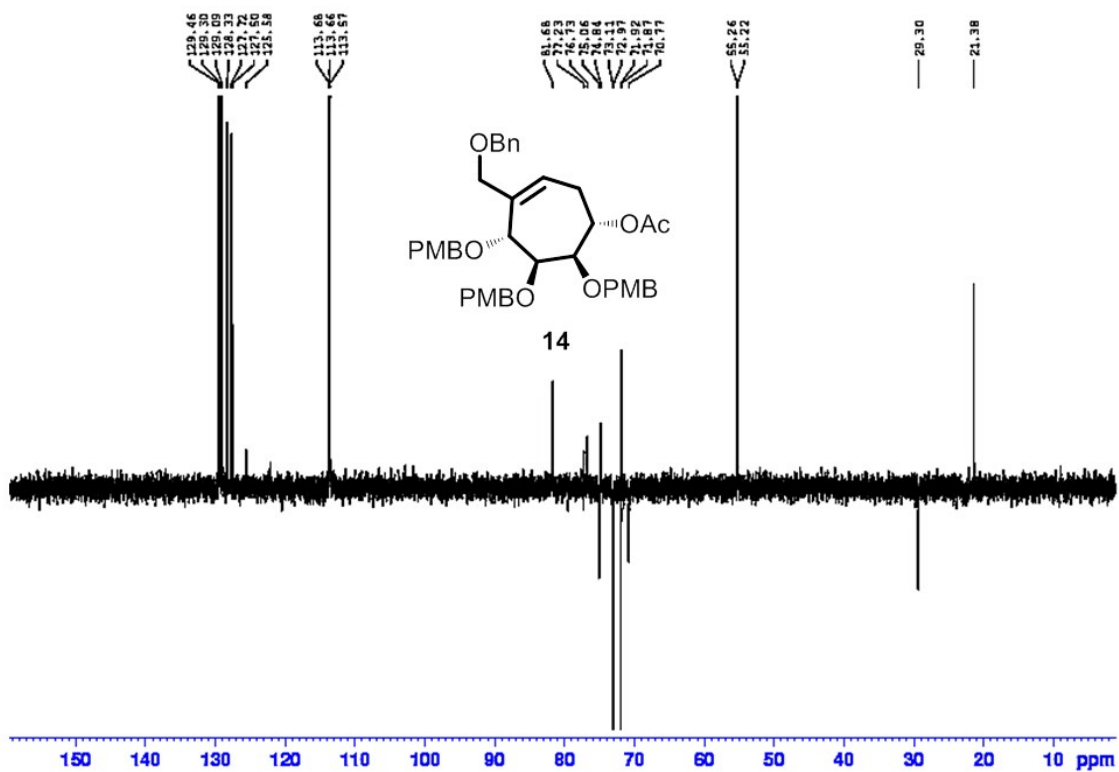

HMQC spectrum of compound **14** recorded in CDCl<sub>3</sub>

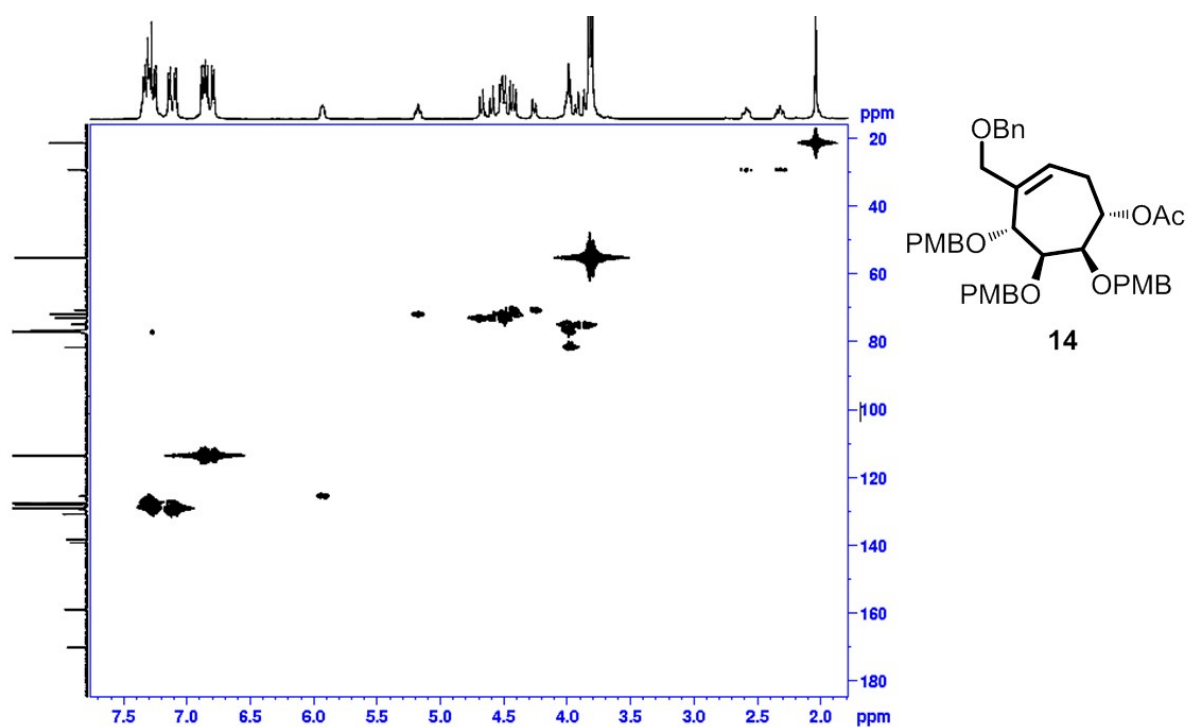

NOESY spectrum of compound **14** recorded in CDCl<sub>3</sub>

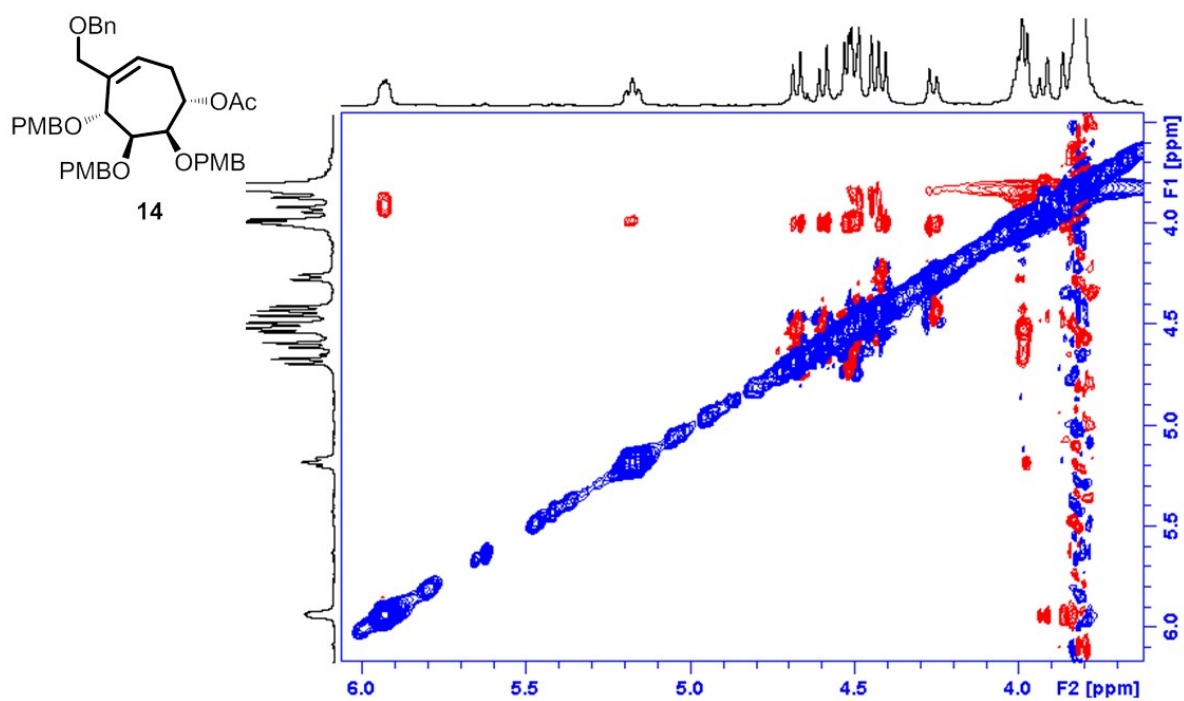



$^1\text{H}$  NMR spectrum of compound **12 $\beta$**  recorded in  $\text{CDCl}_3$

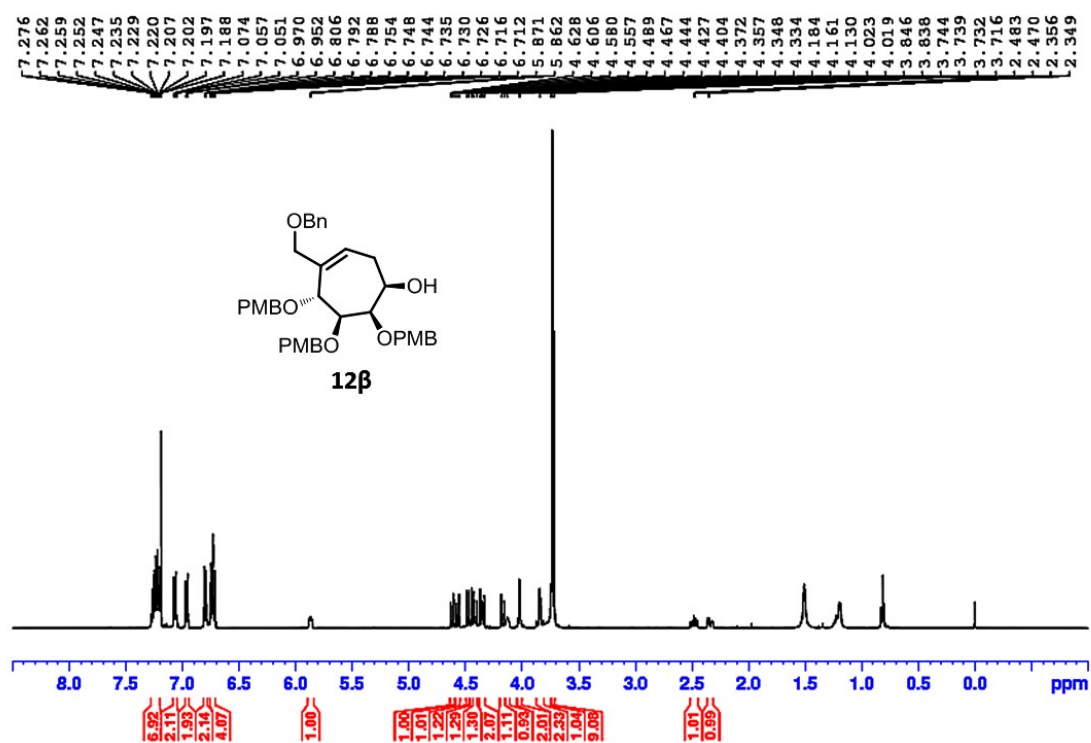

COSY spectra of compound **12 $\beta$**  recorded in  $\text{CDCl}_3$

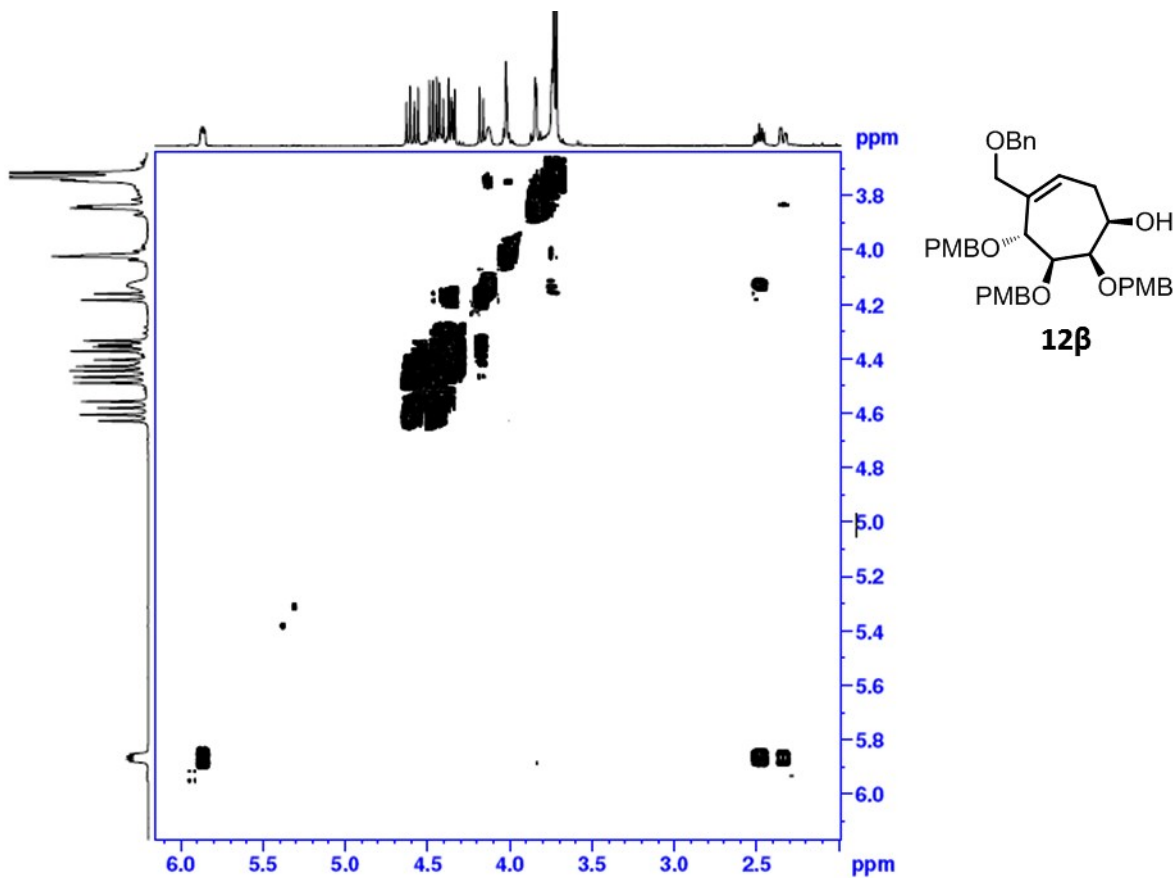



$^{13}\text{C}$  NMR spectrum of compound **12 $\beta$**  recorded in  $\text{CDCl}_3$

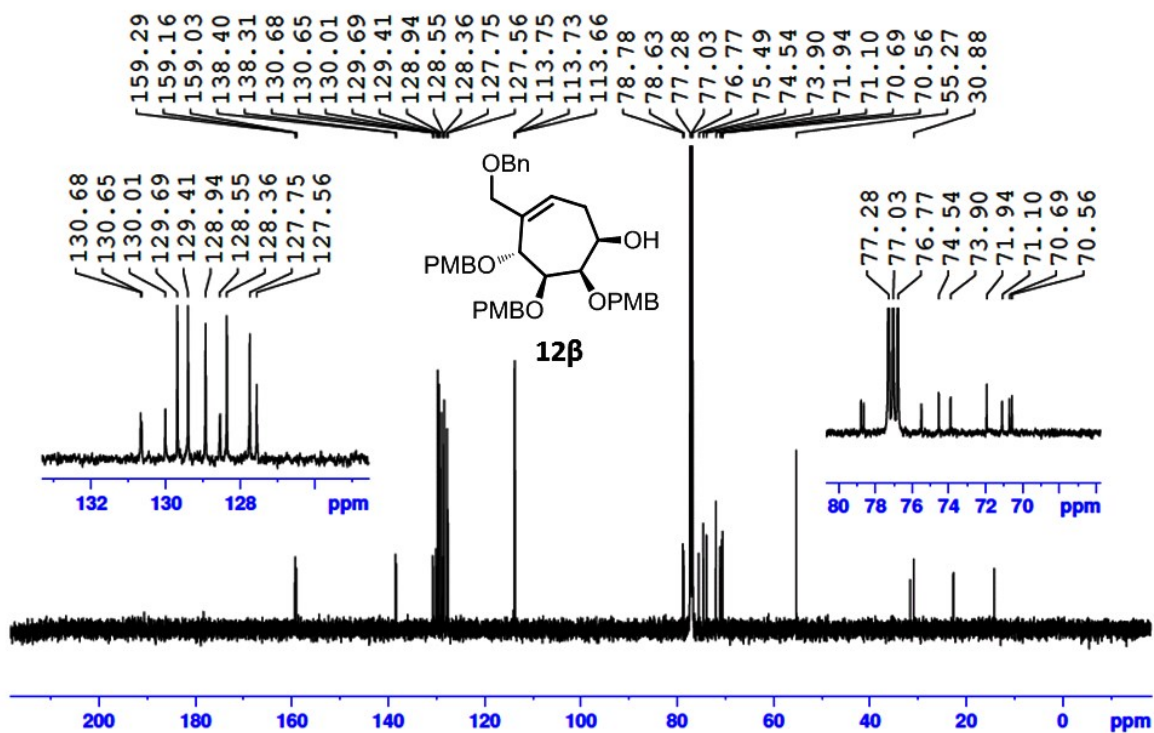

DEPT spectrum of compound **12 $\beta$**  recorded in  $\text{CDCl}_3$

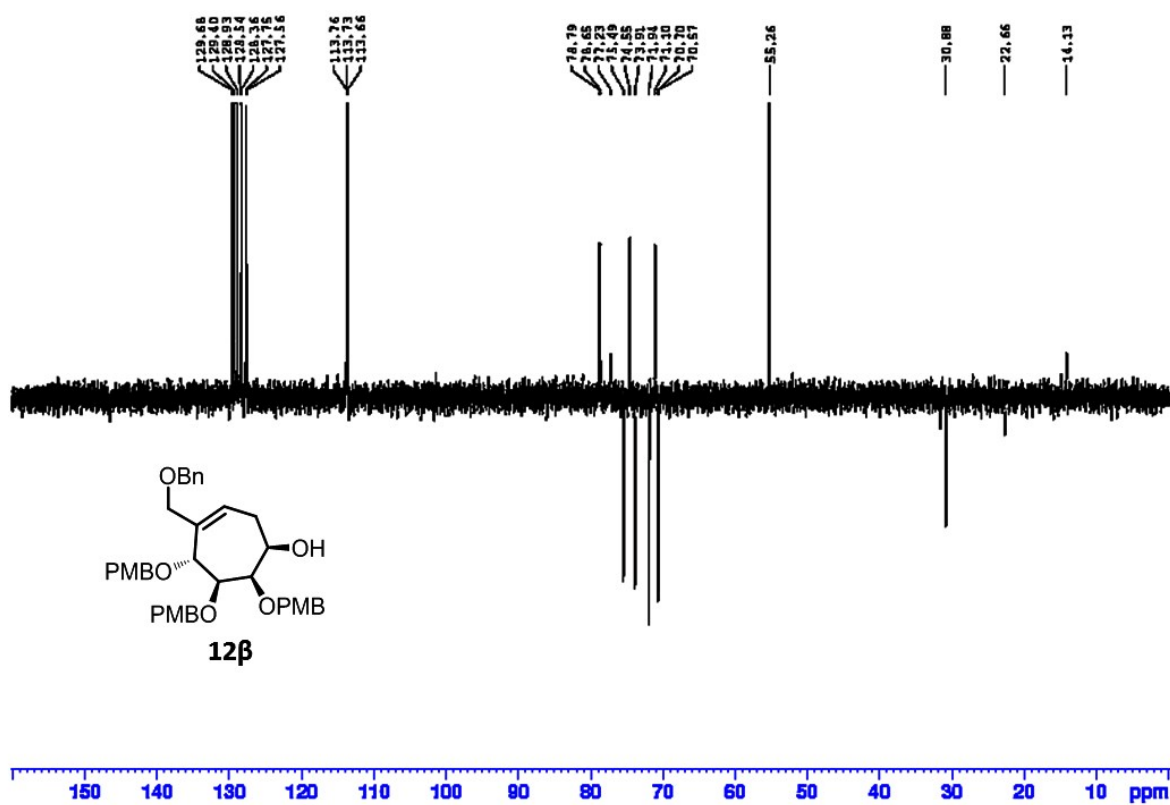

HMQC spectrum of compound **12 $\beta$**  recorded in CDCl<sub>3</sub>

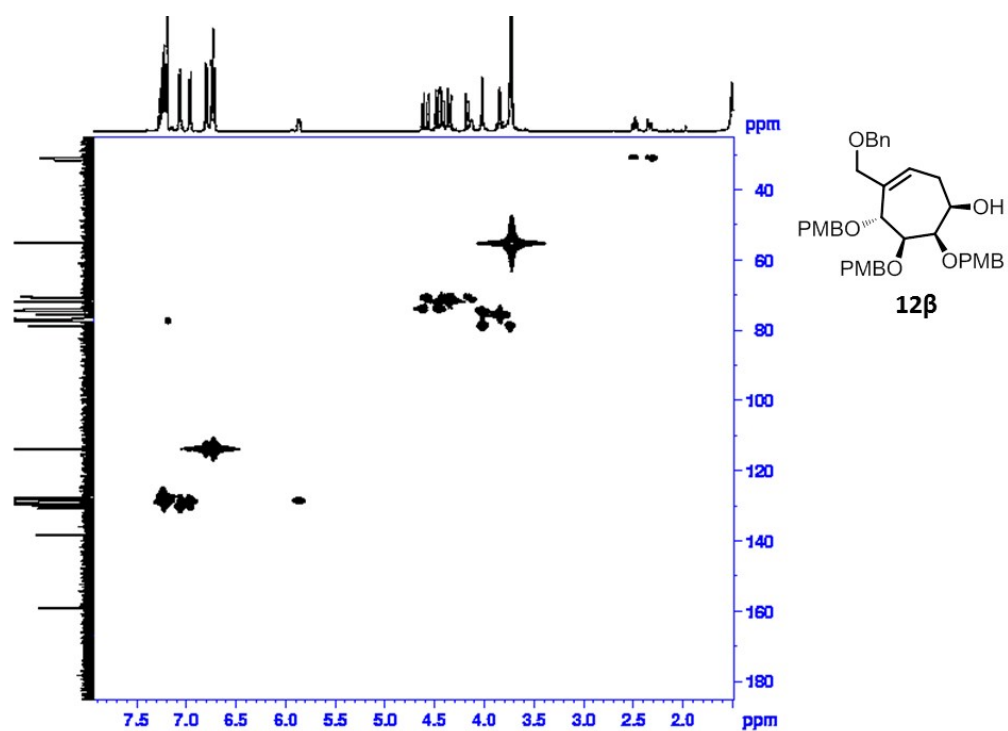

Expanded HMQC spectrum of compound **12 $\beta$**  recorded in CDCl<sub>3</sub>

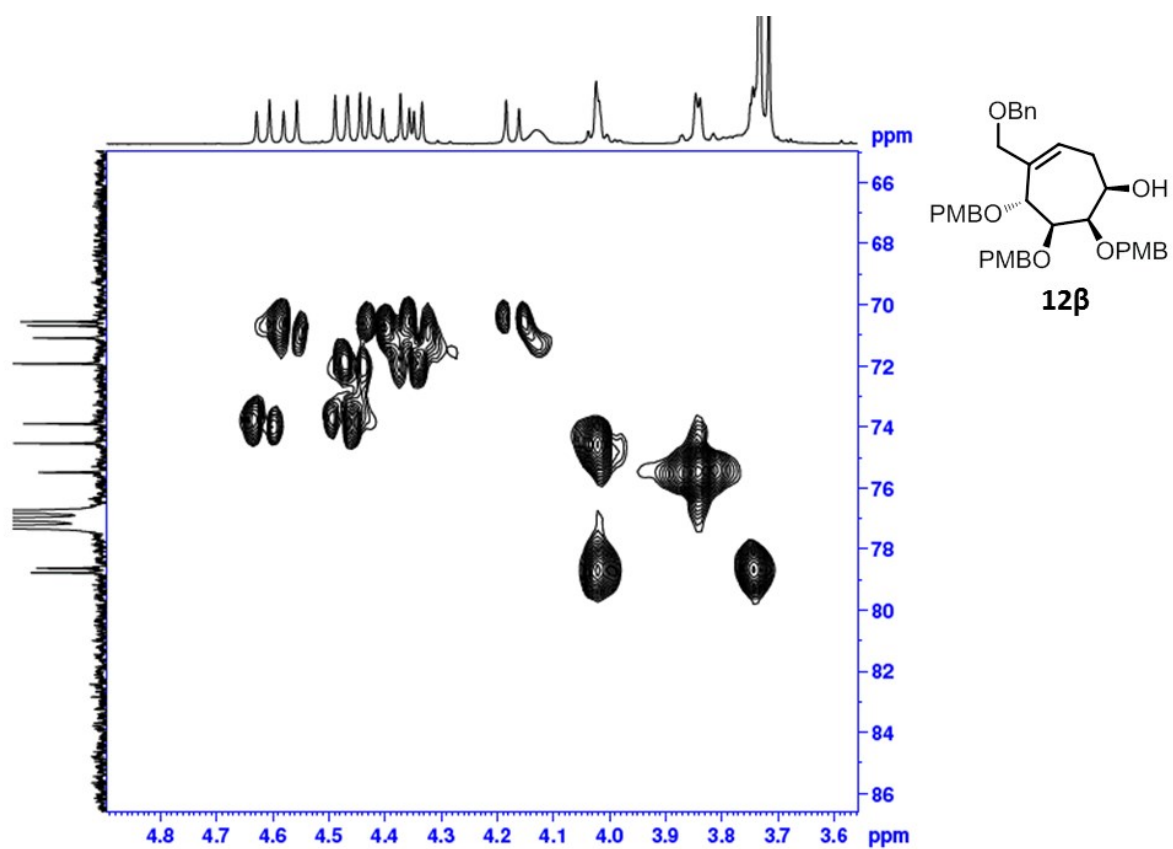

NOESY spectrum of compound **12 $\beta$**  recorded in CDCl<sub>3</sub>

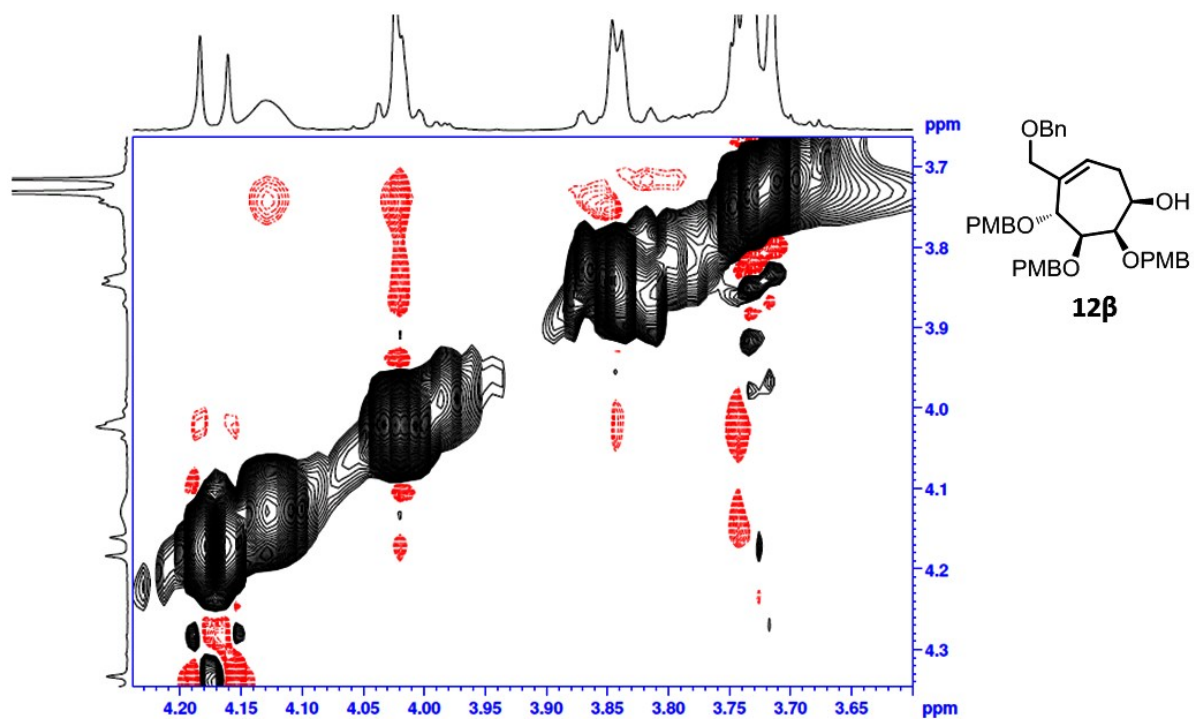

<sup>1</sup>H NMR spectrum of compound **12 $\alpha$**  recorded in CDCl<sub>3</sub>

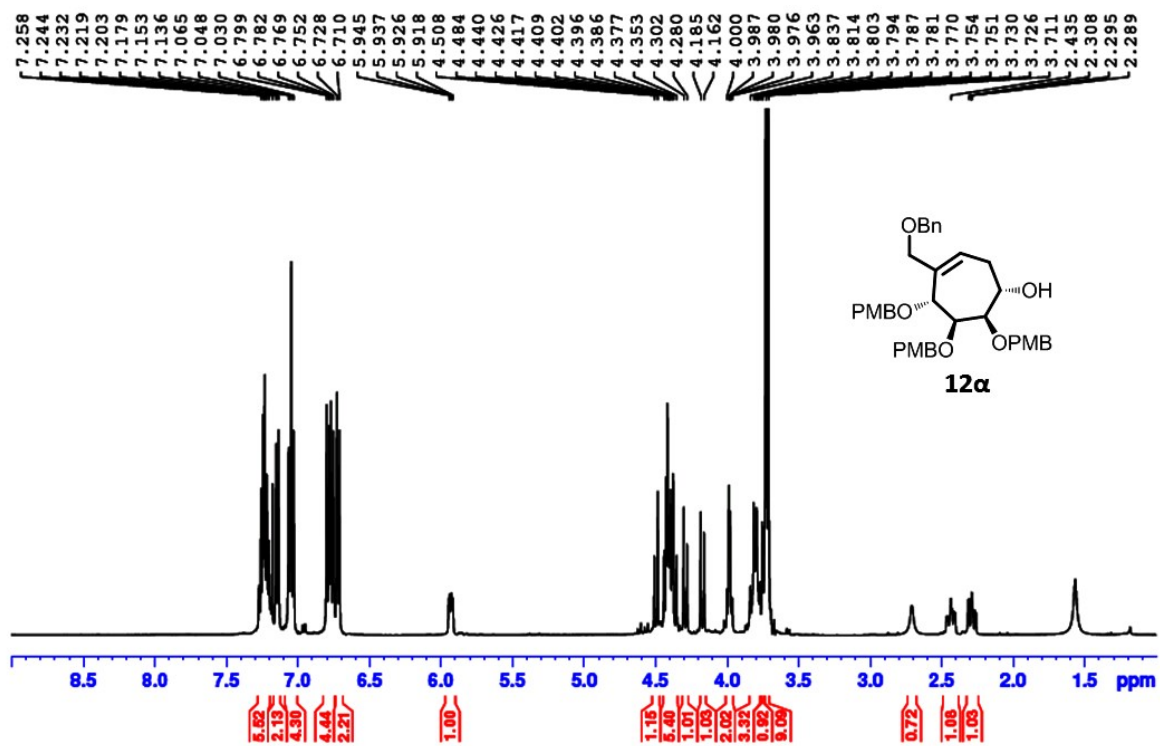

COSY spectrum of compound **12 $\alpha$**  recorded in CDCl<sub>3</sub>

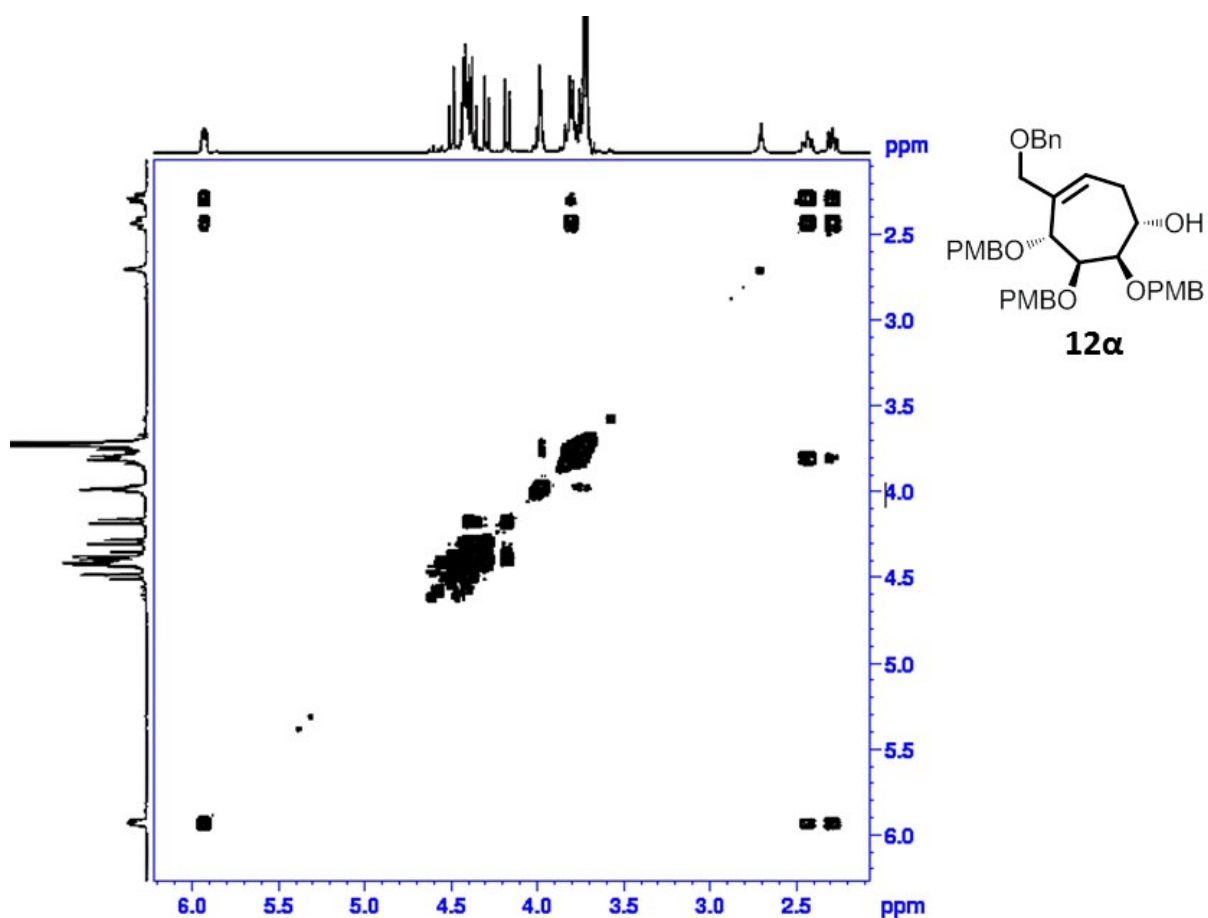

<sup>13</sup>C spectrum of compound **12 $\alpha$**  recorded in CDCl<sub>3</sub>

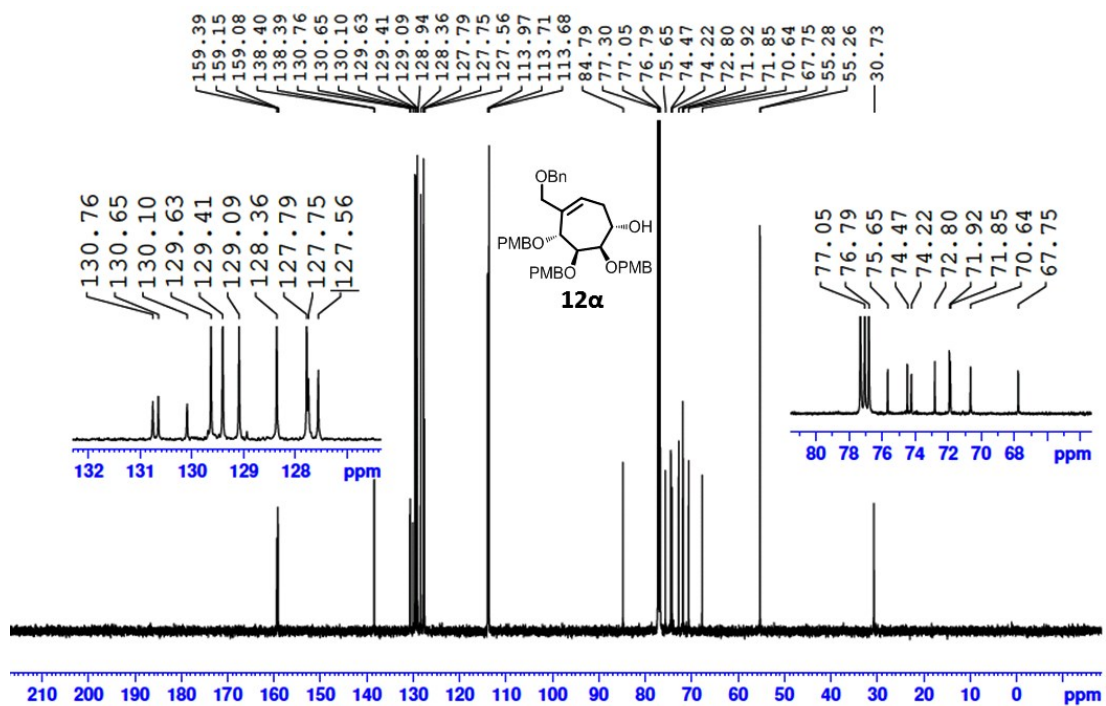

DEPT spectrum of compound **12a** recorded in CDCl<sub>3</sub>

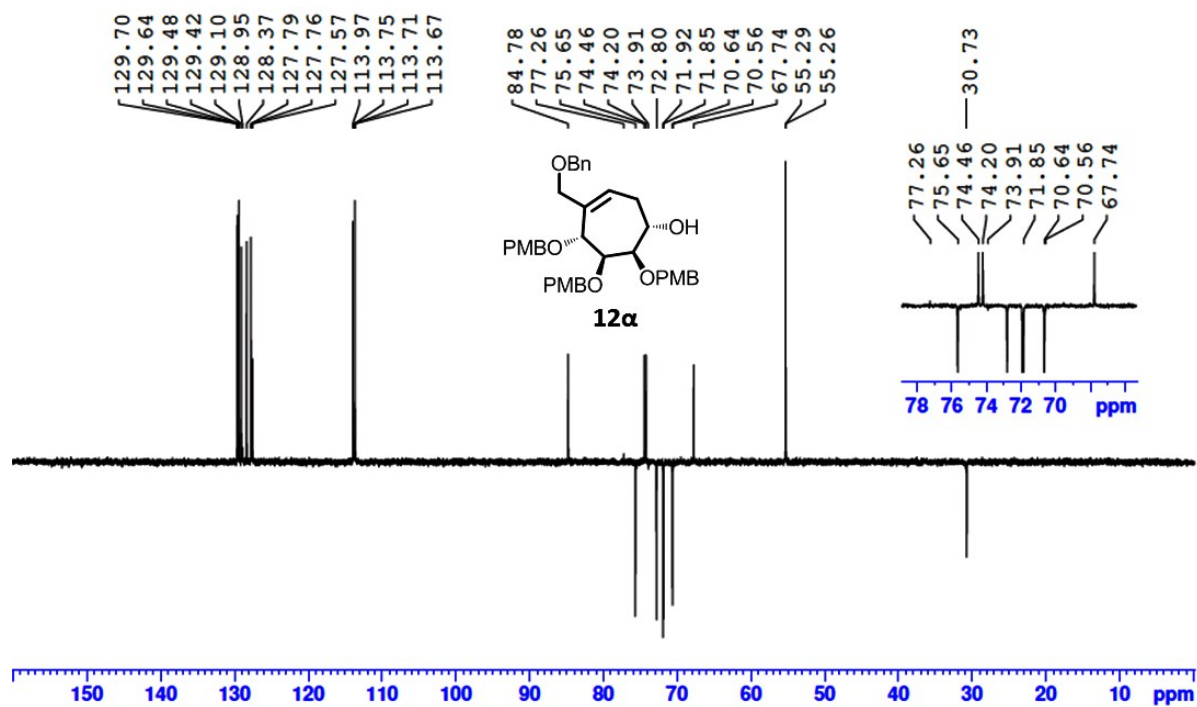

HMQC spectrum of compound **12a** recorded in CDCl<sub>3</sub>

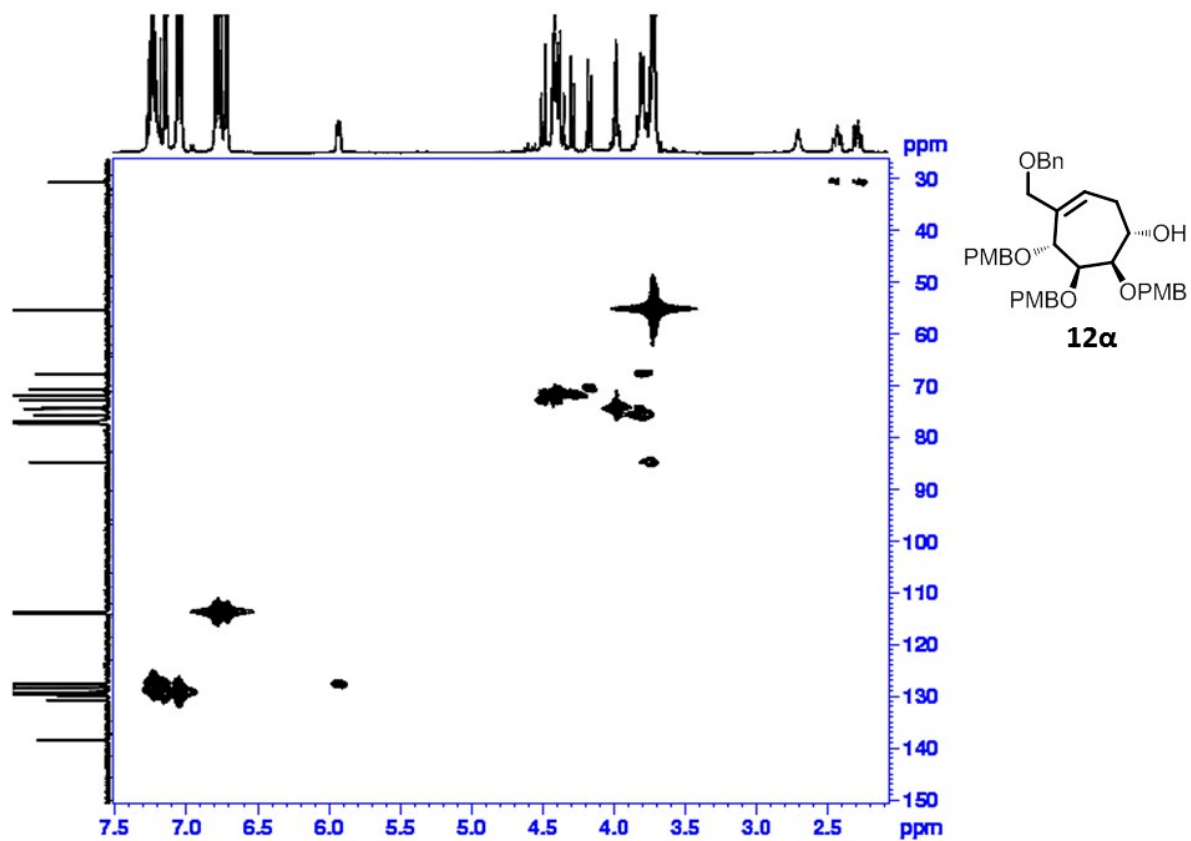



Expanded NOESY spectrum of compound **12a** recorded in CDCl<sub>3</sub>

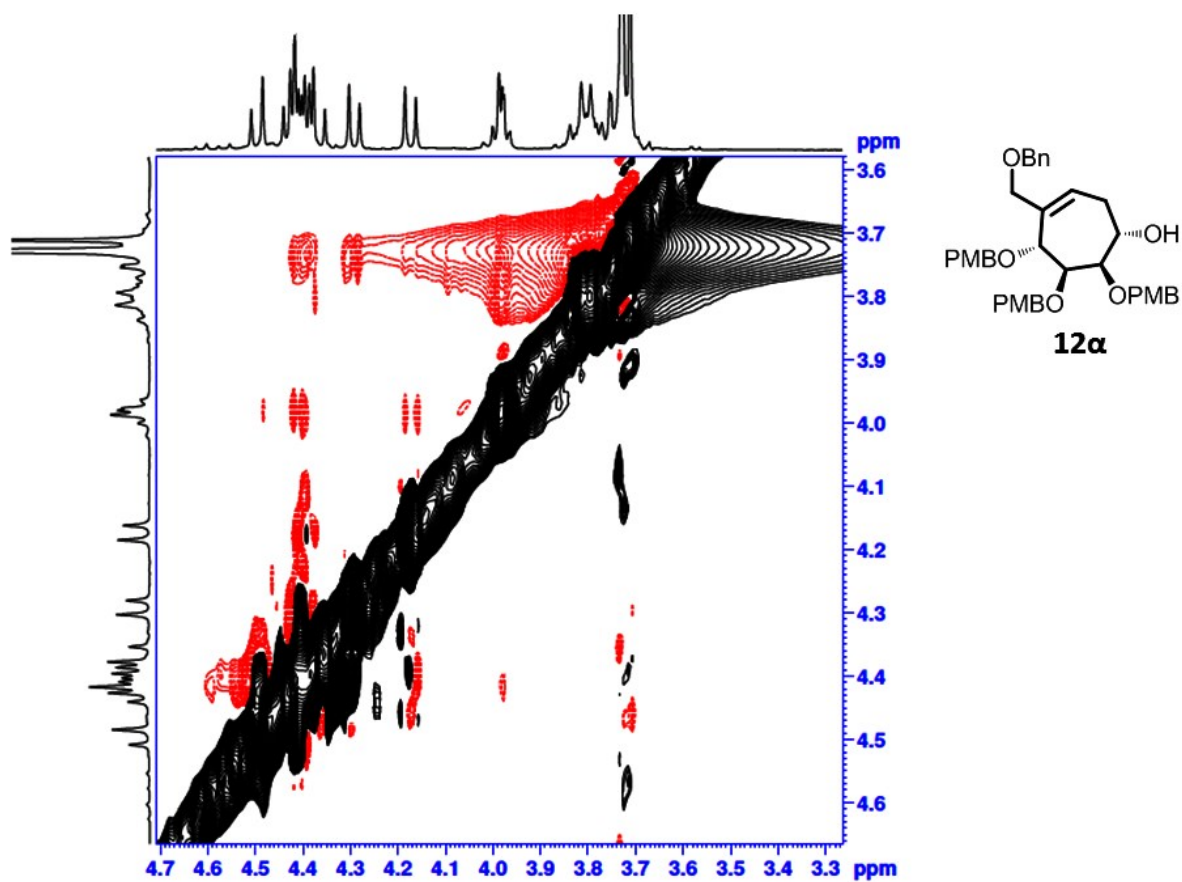

<sup>1</sup>H NMR spectrum of compound **6** recorded in CD<sub>3</sub>OD

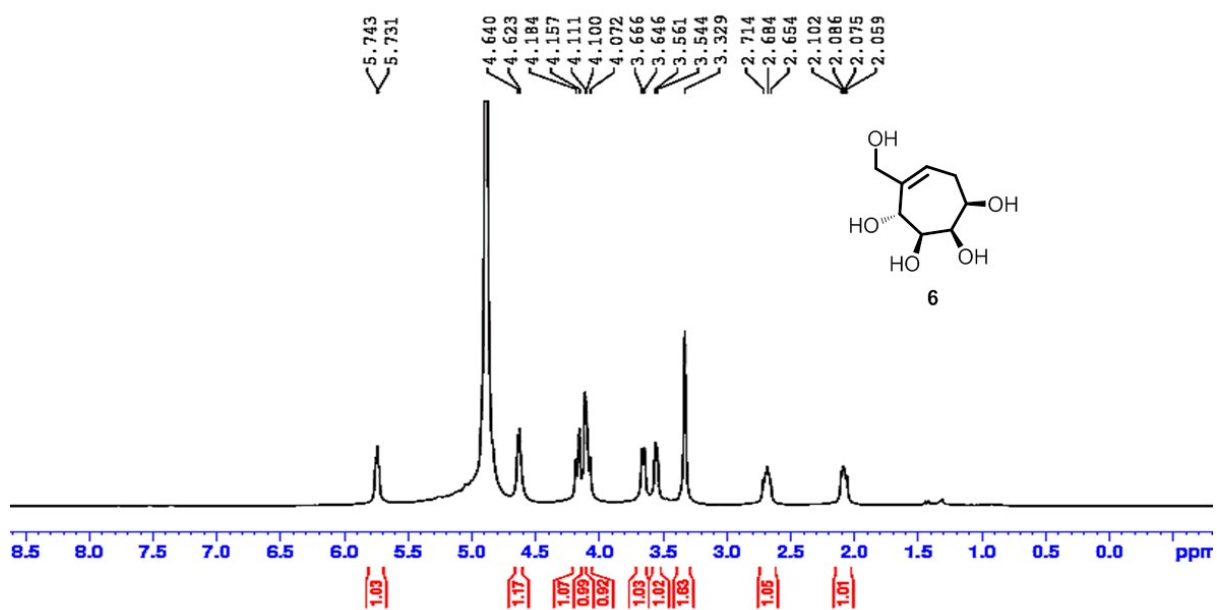

COSY spectrum of compound **6** recorded in CD<sub>3</sub>OD

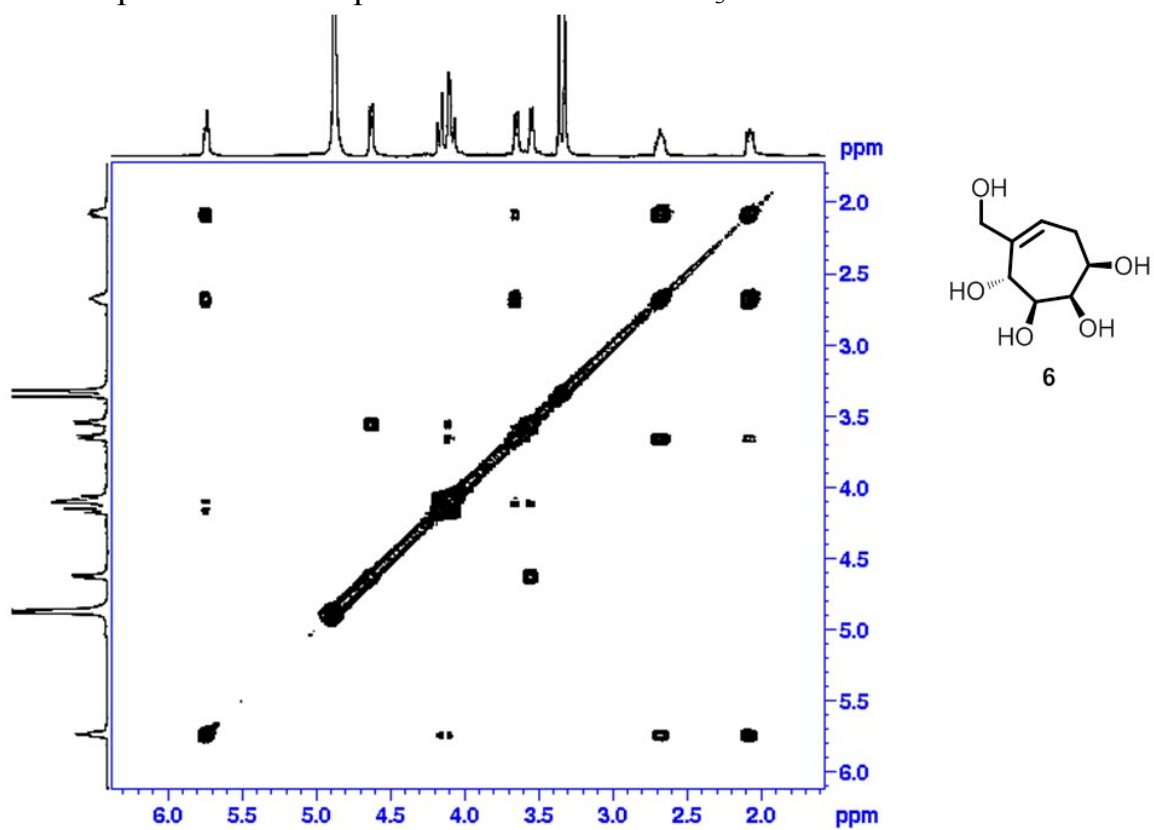

<sup>13</sup>C NMR spectrum of compound **6** recorded in CD<sub>3</sub>OD

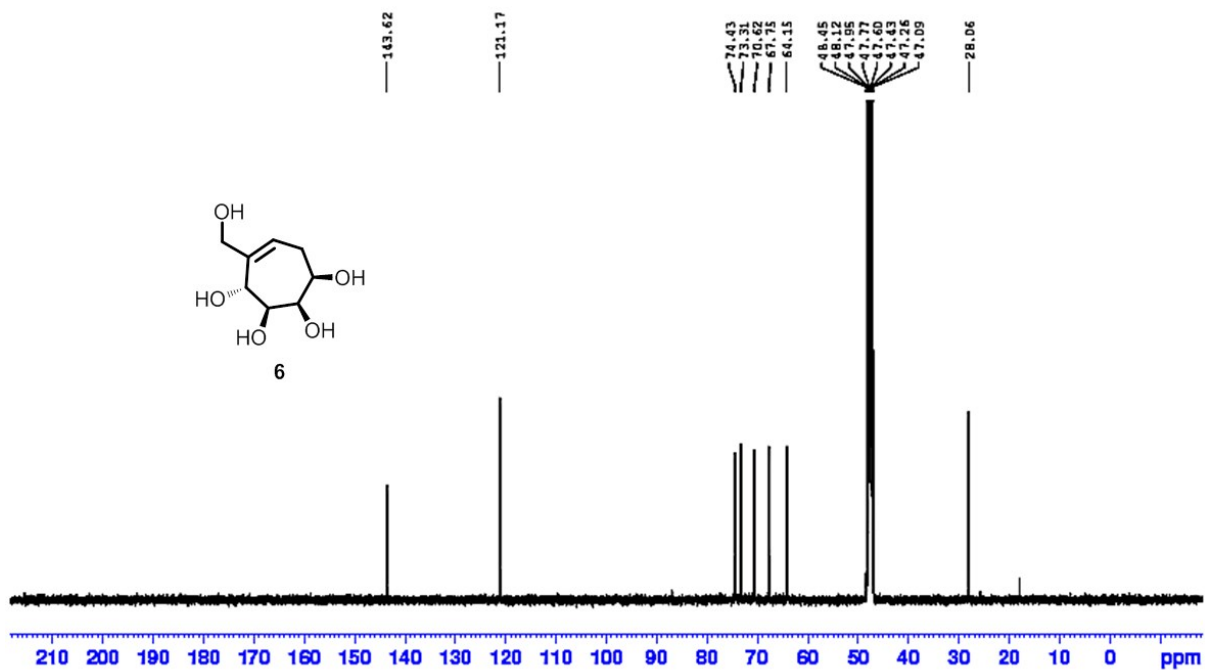

DEPT spectrum of compound **6** recorded in CD<sub>3</sub>OD

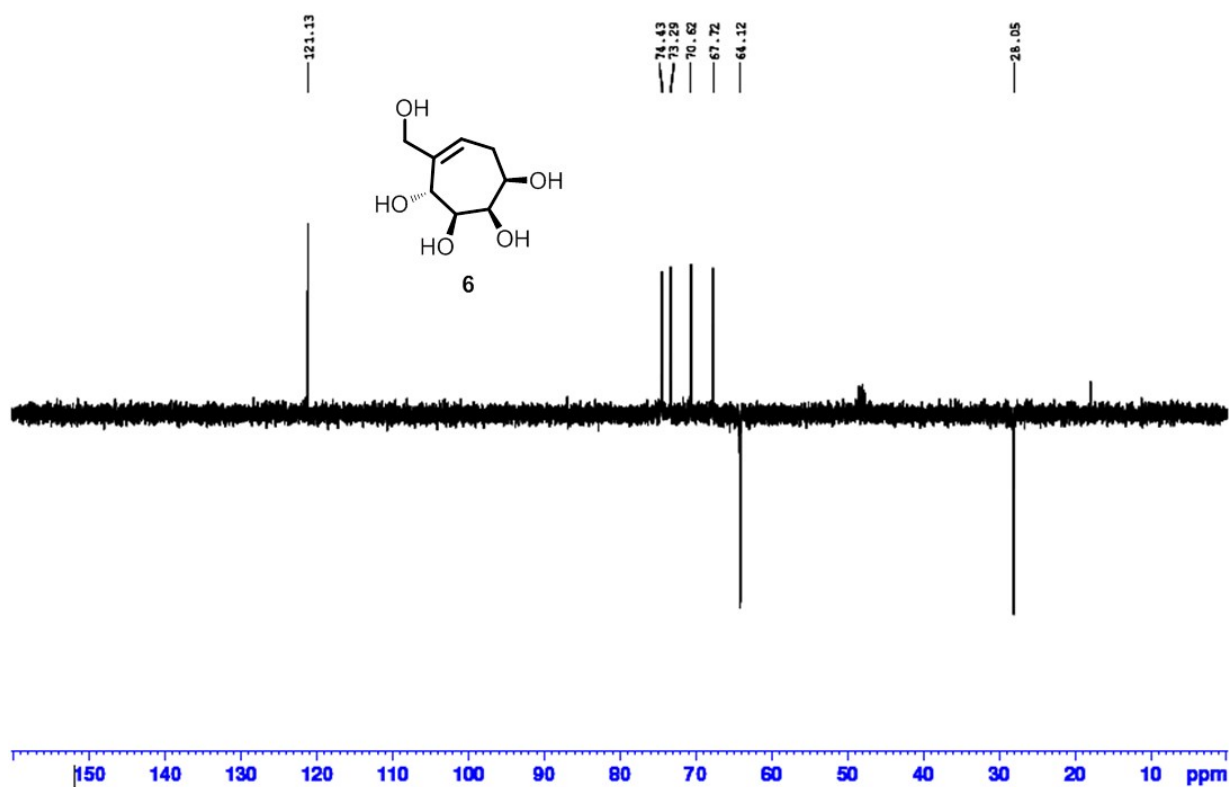

HMQC spectrum of compound **6** recorded in CD<sub>3</sub>OD

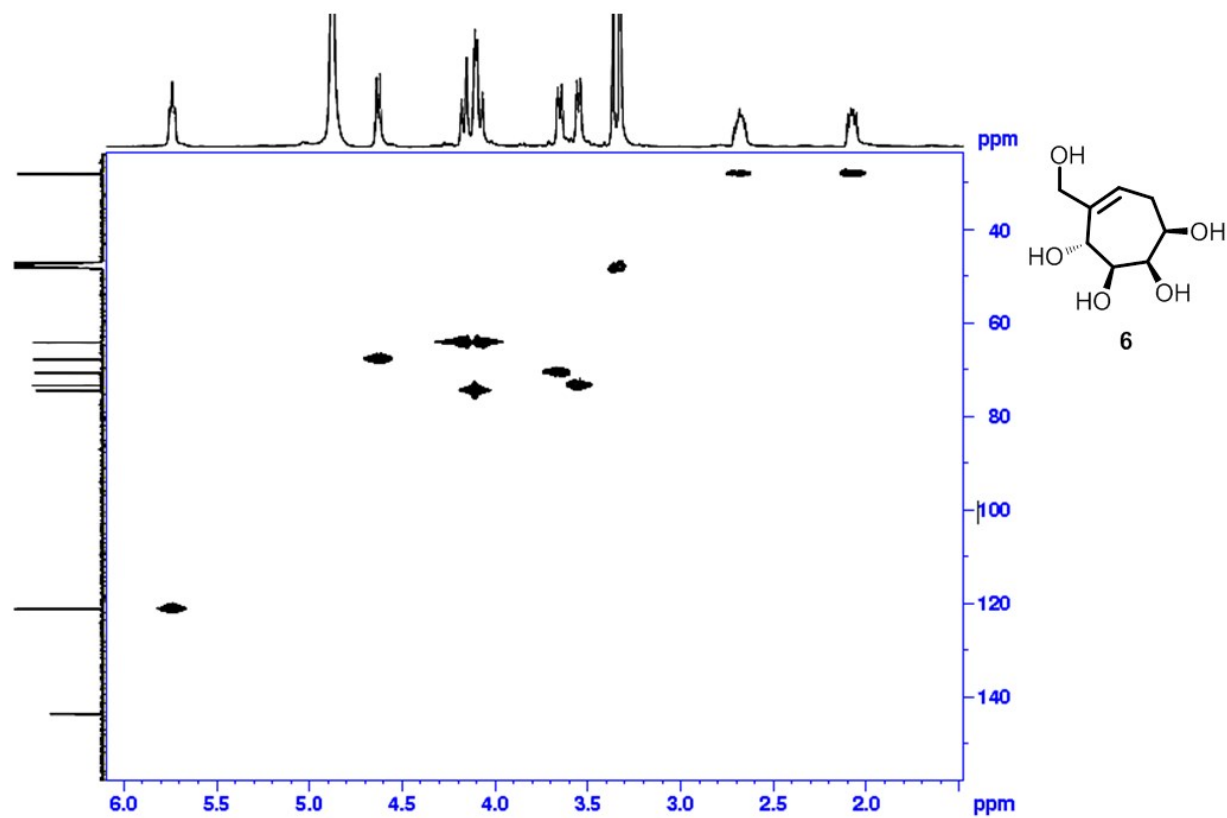



NOESY spectrum of compound **6** recorded in CD<sub>3</sub>OD

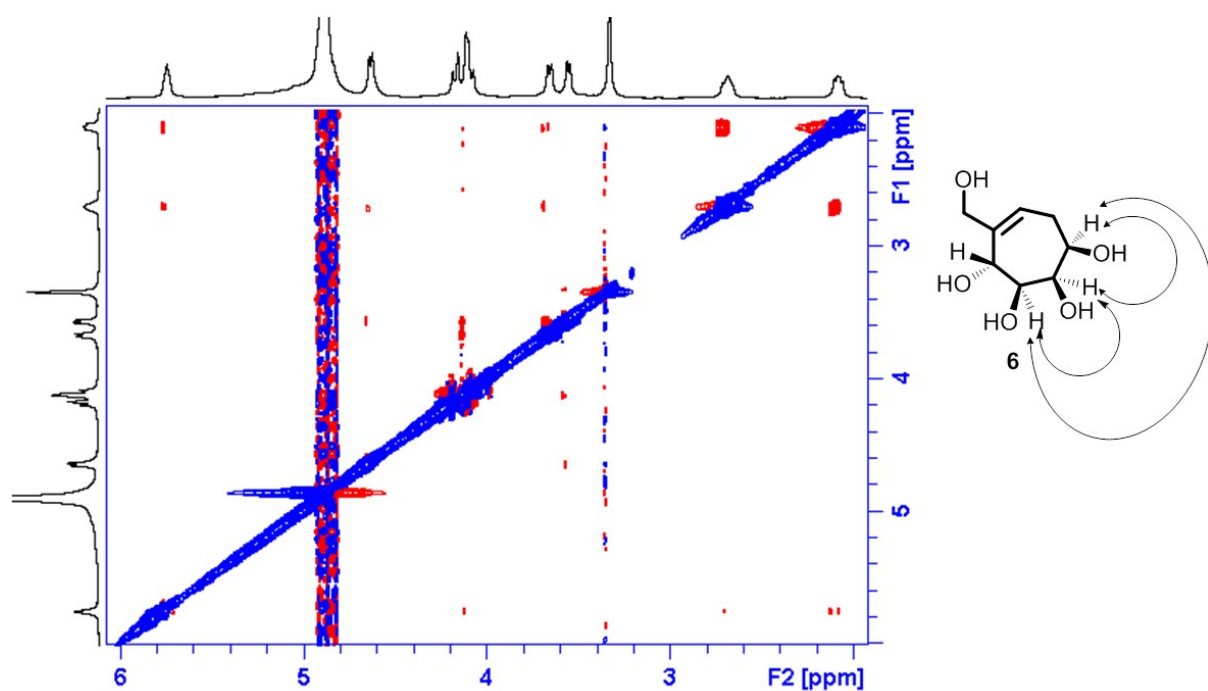

Expanded NOESY spectrum of compound **6** recorded in CD<sub>3</sub>OD

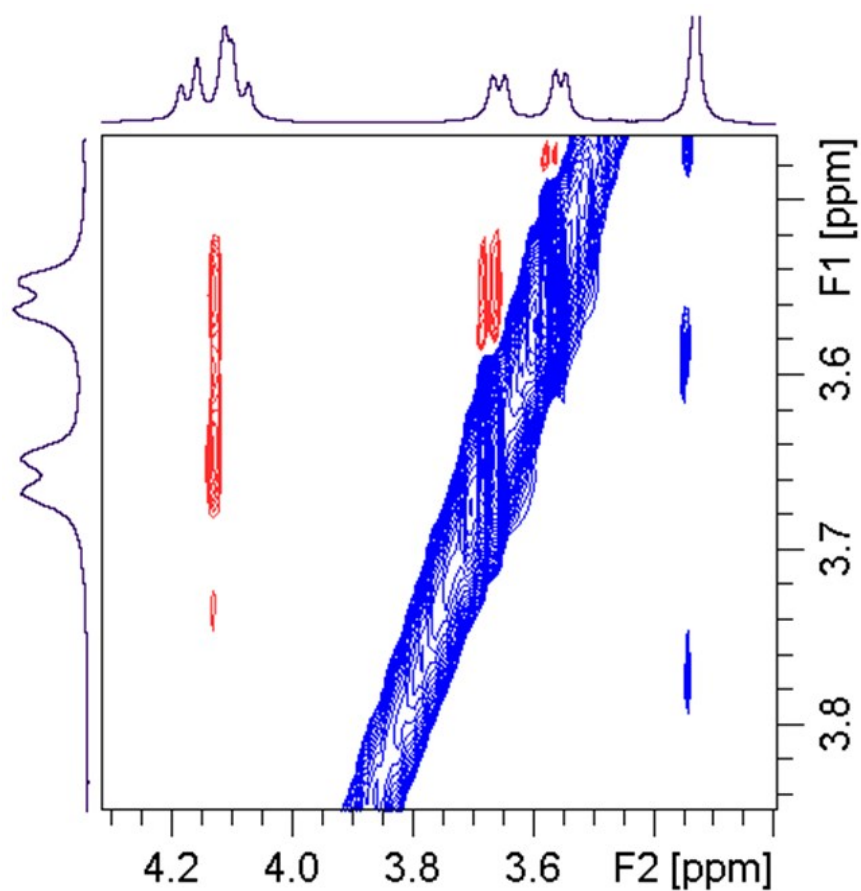

$^1\text{H}$  NMR spectrum of compound **5** recorded in  $\text{CD}_3\text{OD}$

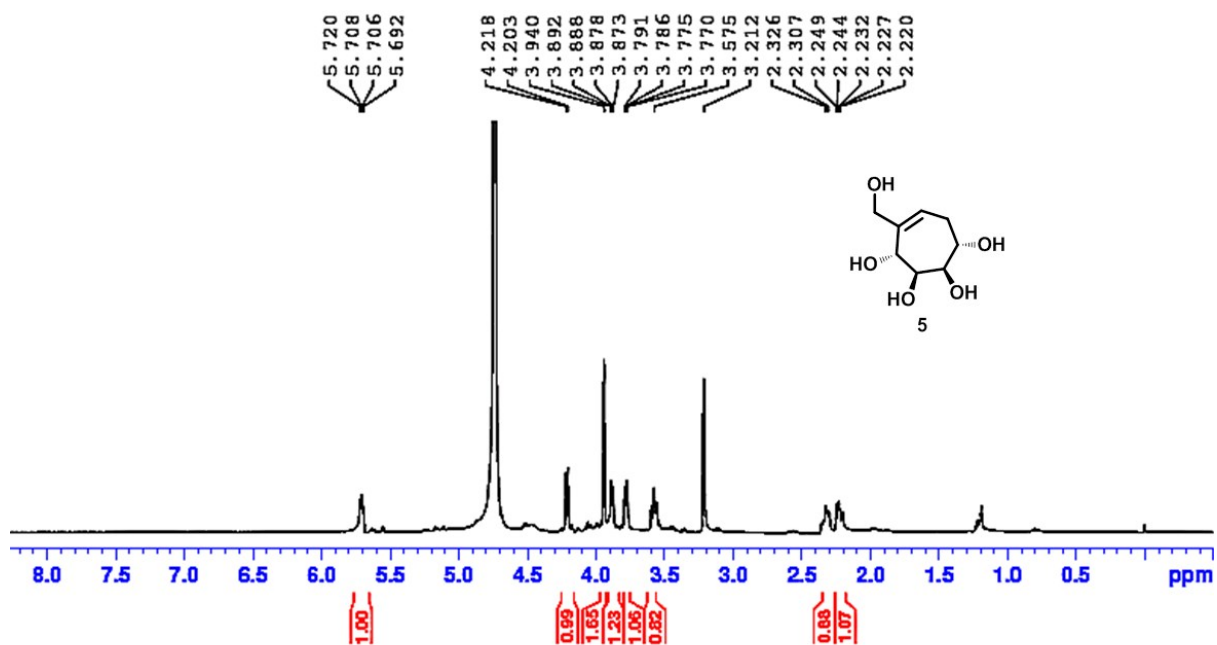

COSY spectrum of compound **5** recorded in  $\text{CD}_3\text{OD}$

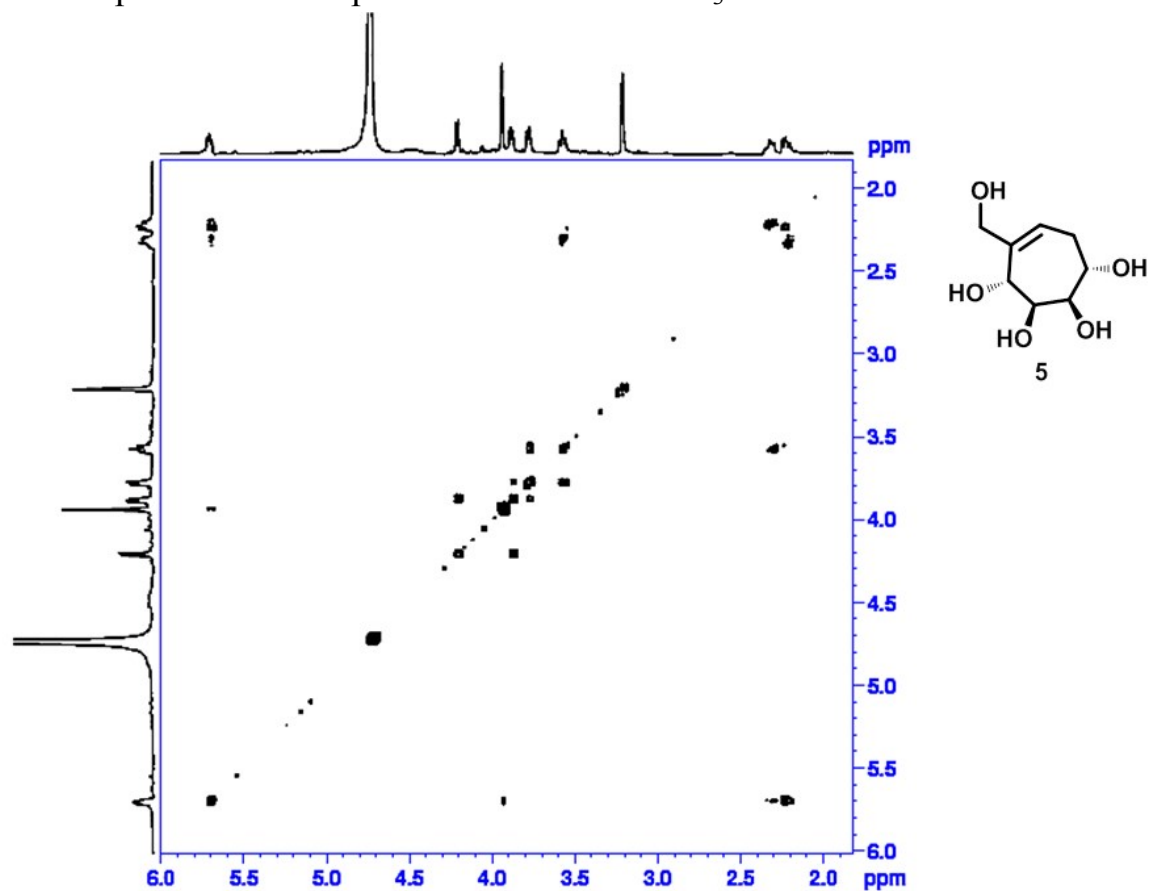

$^{13}\text{C}$  spectrum of compound **5** recorded in  $\text{CD}_3\text{OD}$

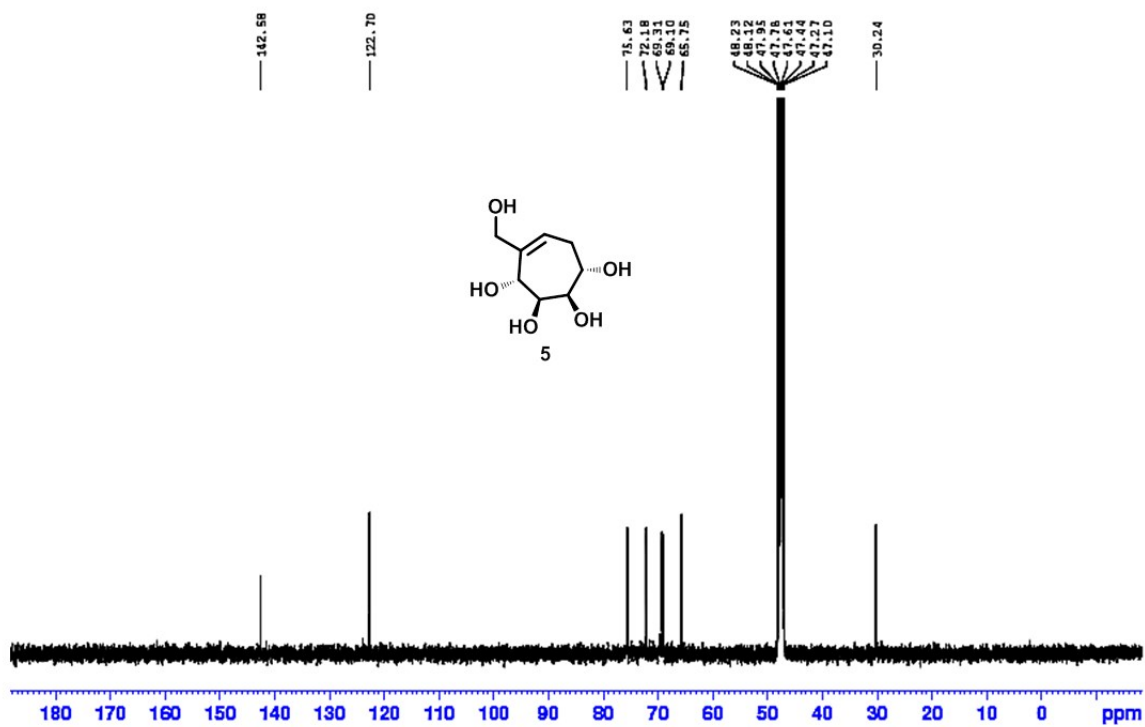

DEPT spectrum compound **5** recorded in  $\text{CD}_3\text{OD}$

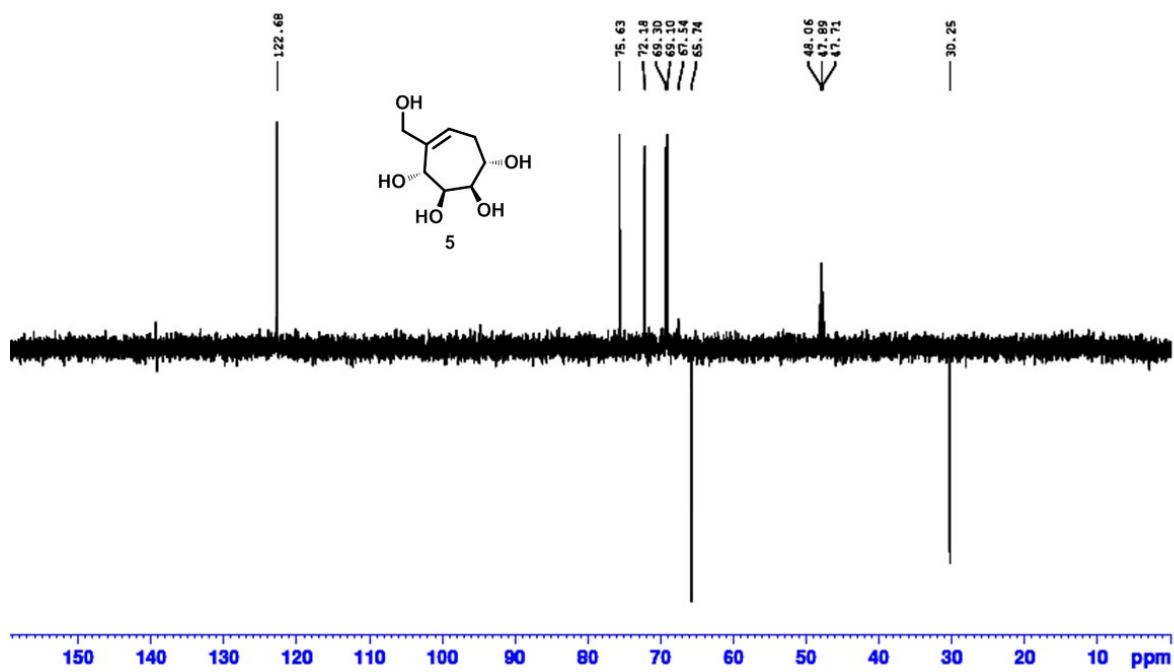



Expanded NOESY spectrum compound **5** recorded in CD<sub>3</sub>OD

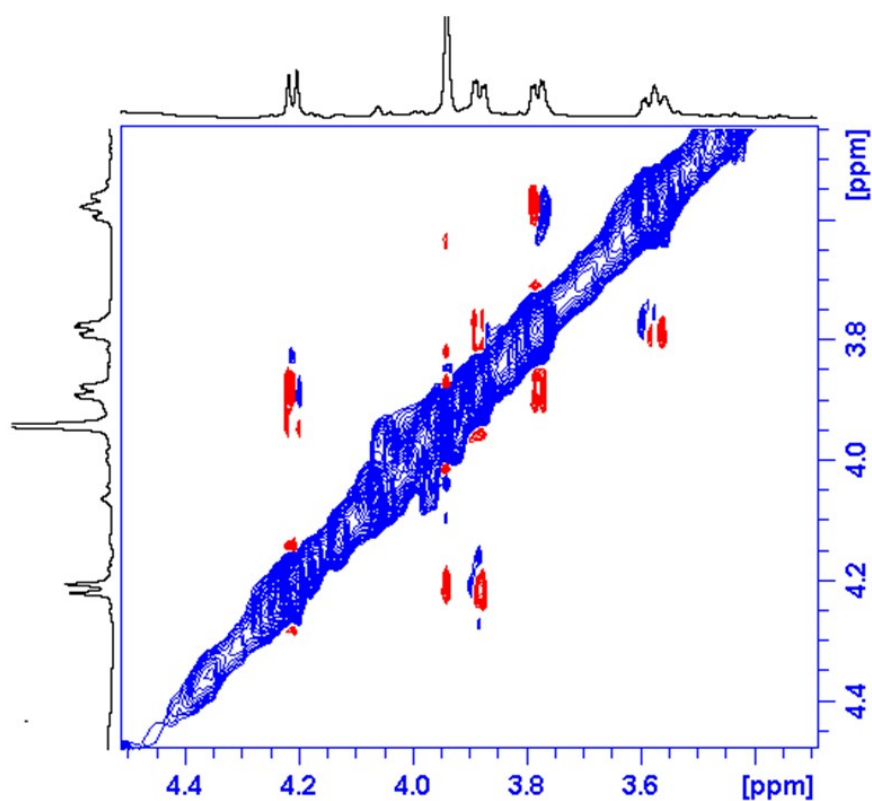

<sup>1</sup>H NMR spectrum of mixture of compounds **15** (major) and **16** (minor) recorded in CD<sub>3</sub>OD

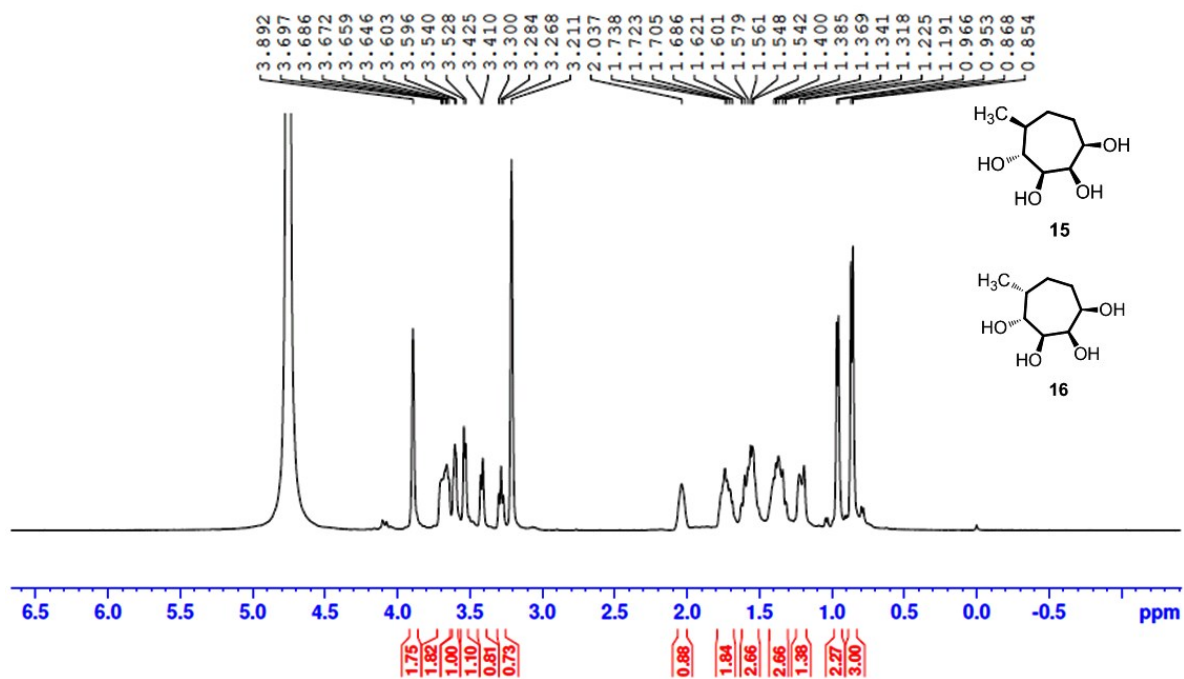

$^1\text{H}$  NMR spectrum of inseparable mixture of diastereomers **17** recorded in  $\text{CD}_3\text{OD}$

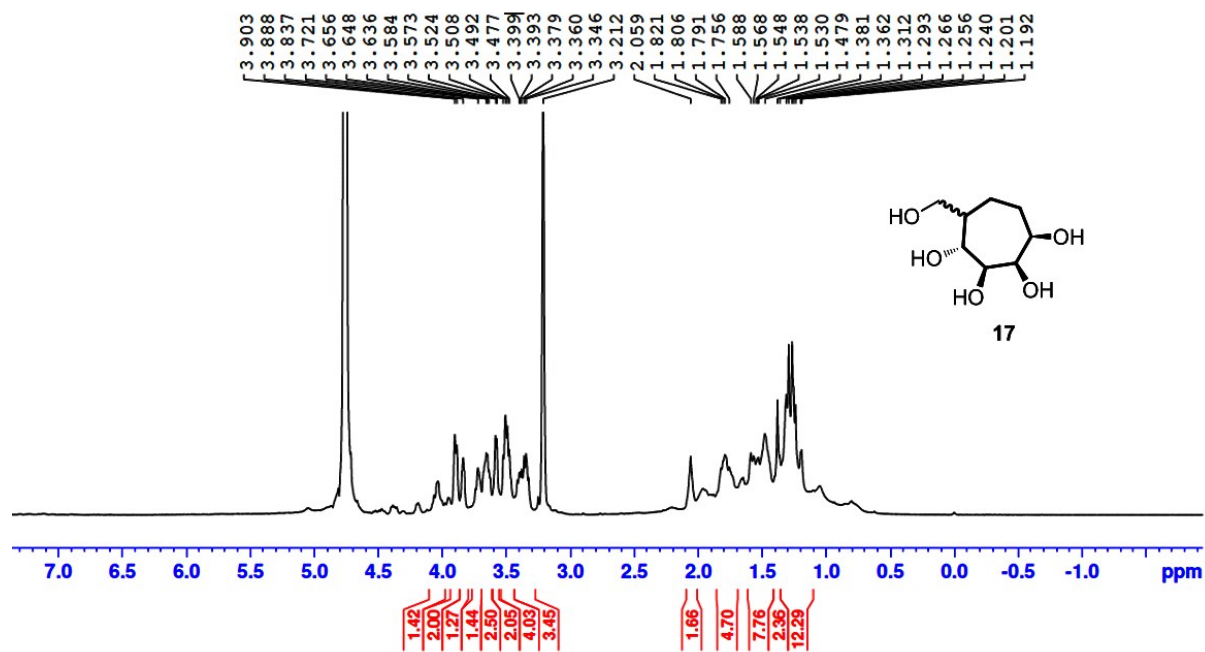

$^1\text{H}$  NMR spectrum of compound **15** recorded in  $\text{CD}_3\text{OD}$

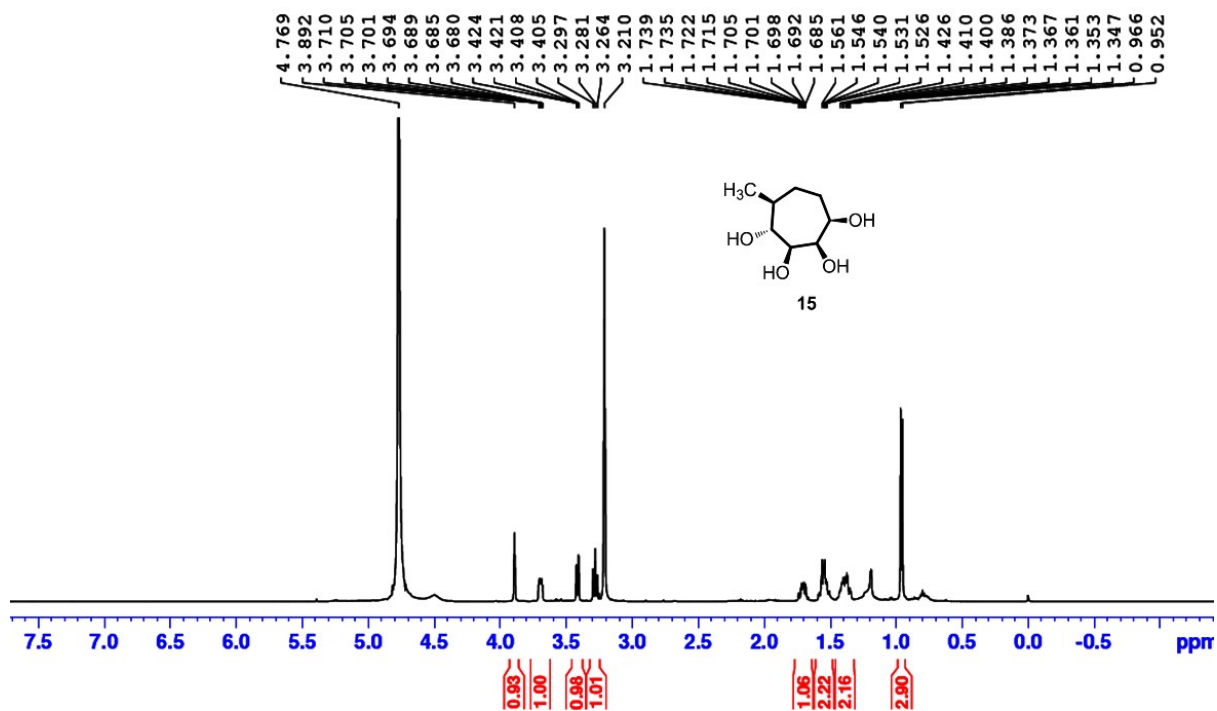

COSY spectrum of compound **15** recorded in CD<sub>3</sub>OD

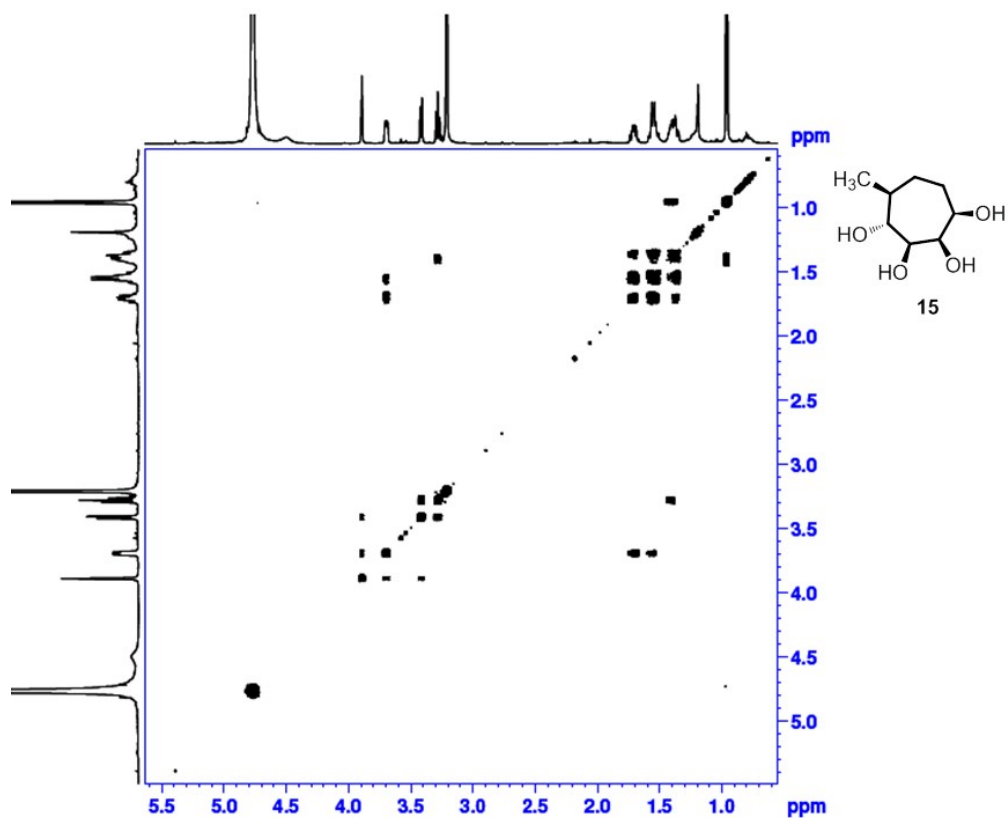

<sup>13</sup>C spectrum of compound **15** recorded in CD<sub>3</sub>OD

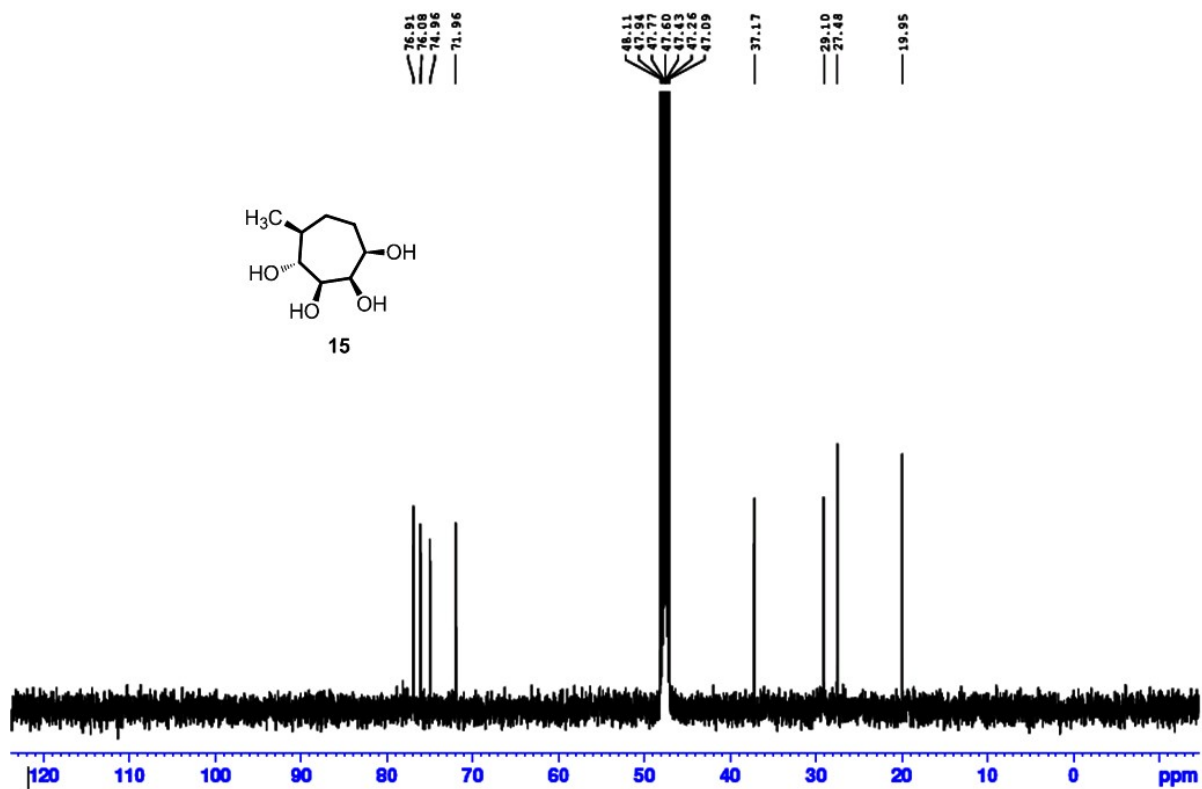

DEPT spectrum of compound **15** recorded in CD<sub>3</sub>OD

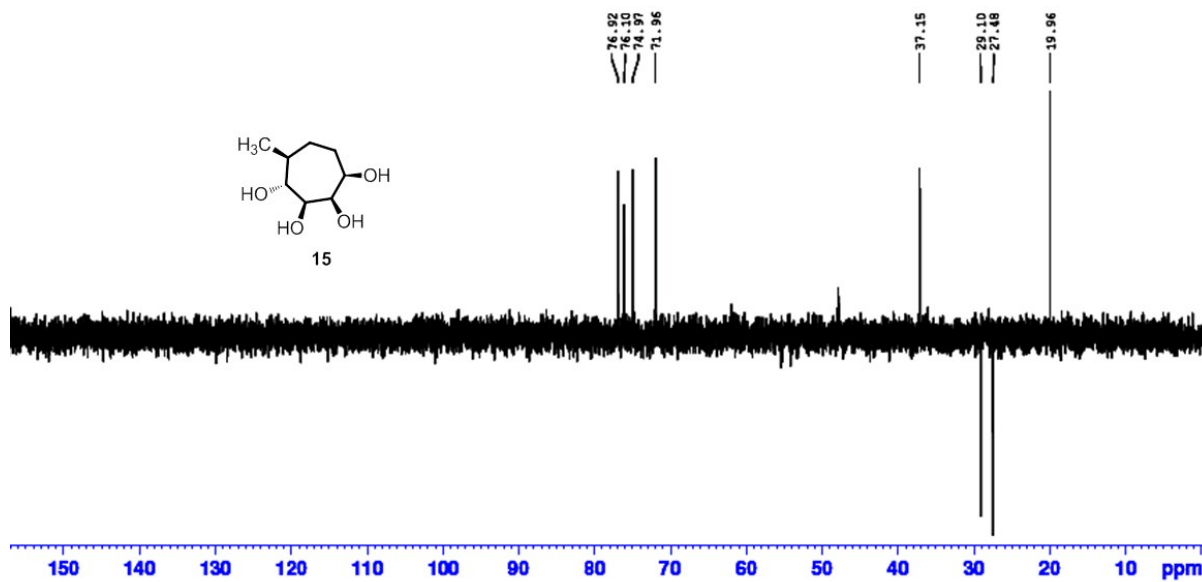

HMQC spectrum of compound **15** recorded in CD<sub>3</sub>OD



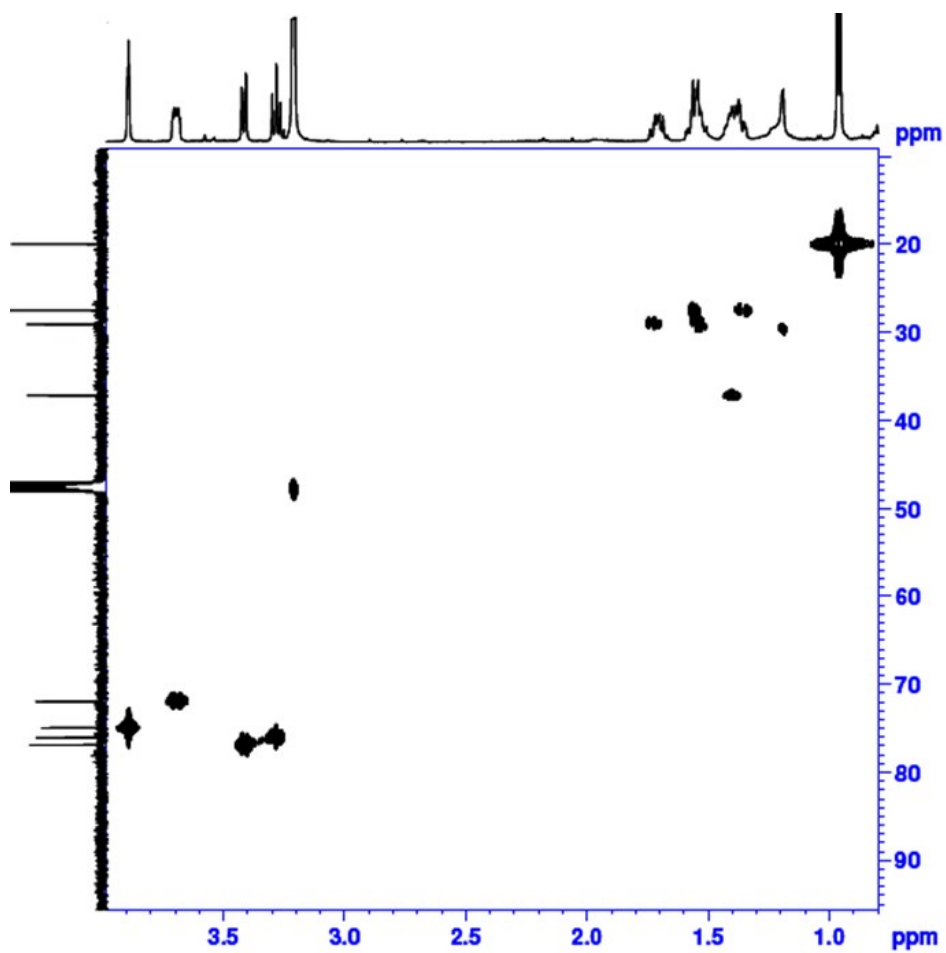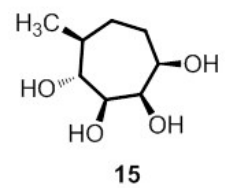

NOESY spectrum of compound **15** recorded in CD<sub>3</sub>OD

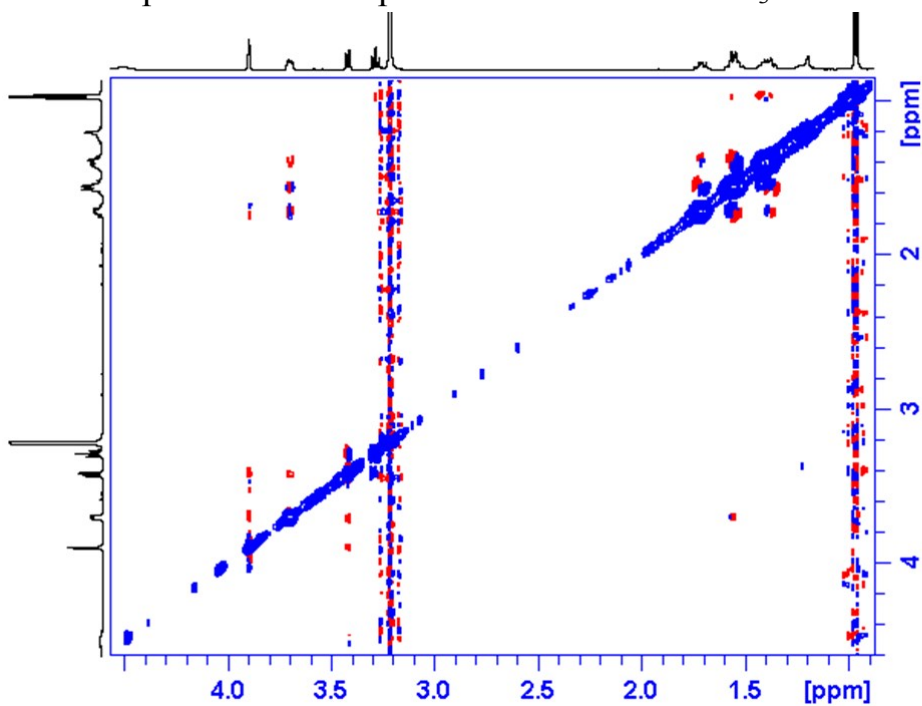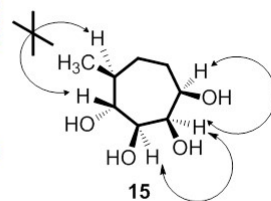

$^1\text{H}$  spectrum of compound **16** recorded in  $\text{CD}_3\text{OD}$

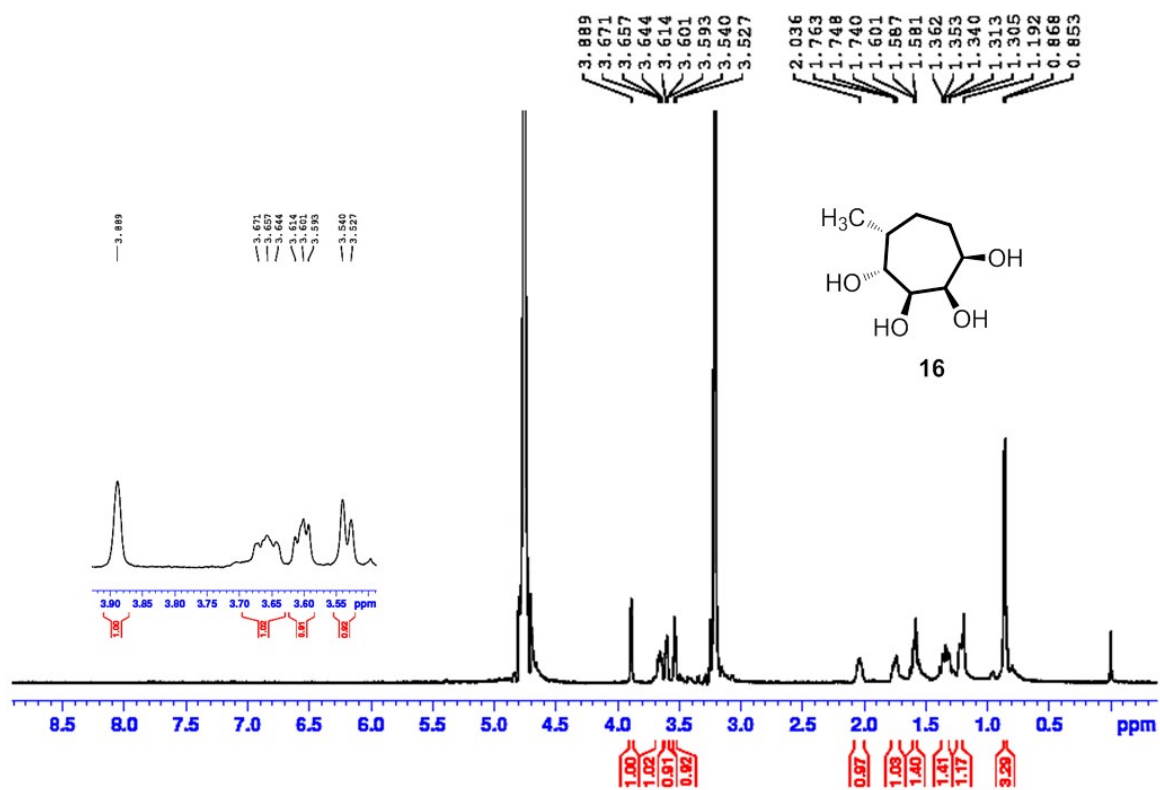

COSY spectrum of compound **16** recorded in  $\text{CD}_3\text{OD}$

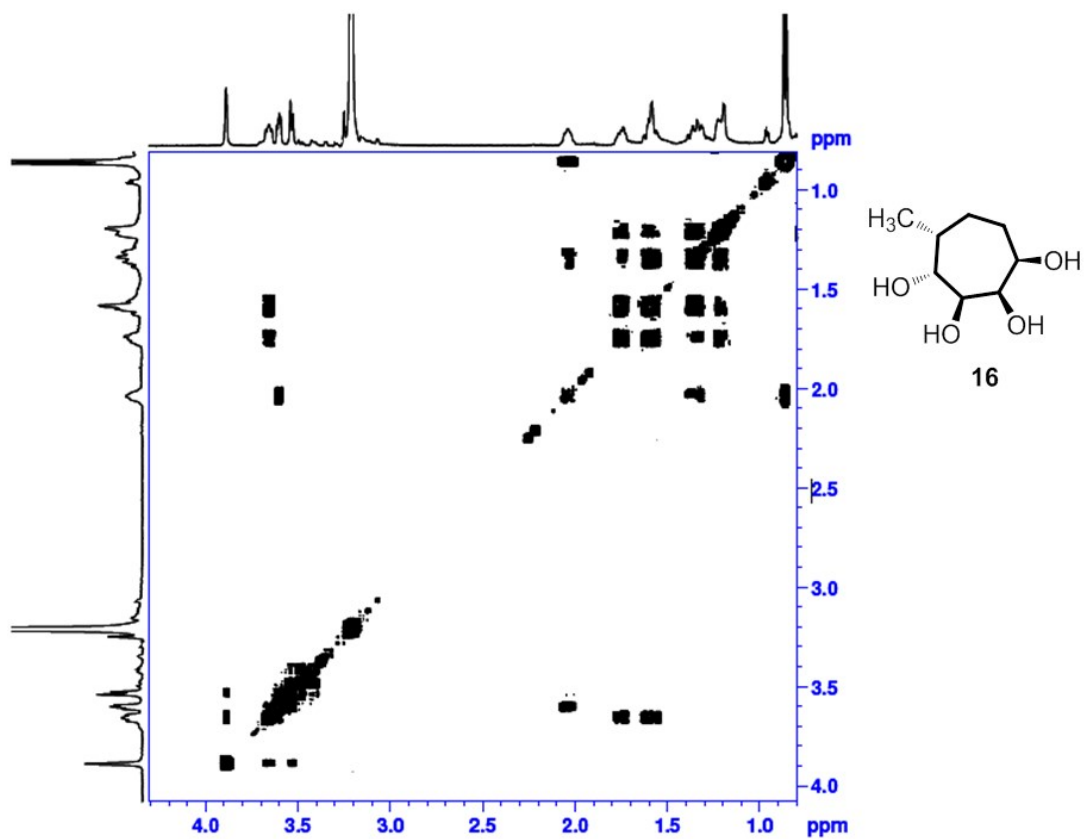

$^{13}\text{C}$  NMR spectrum of compound **16** recorded in  $\text{CD}_3\text{OD}$

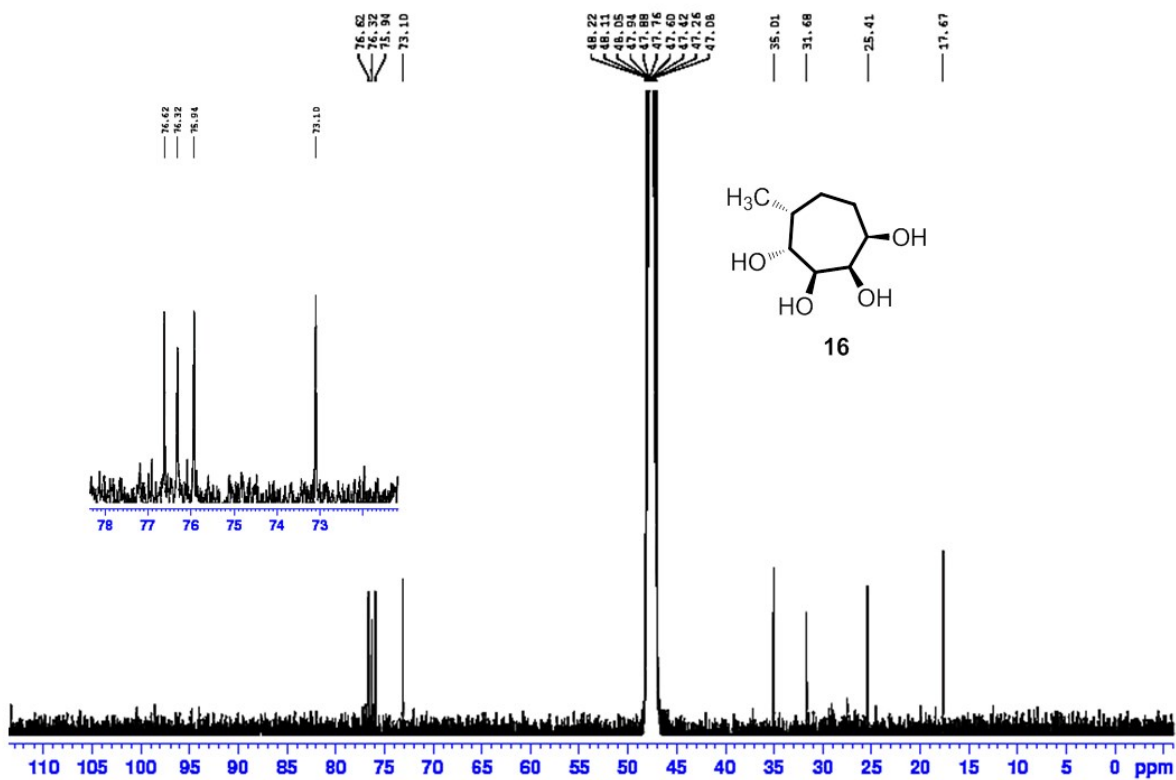

DEPT spectrum of compound **16** recorded in CD<sub>3</sub>OD

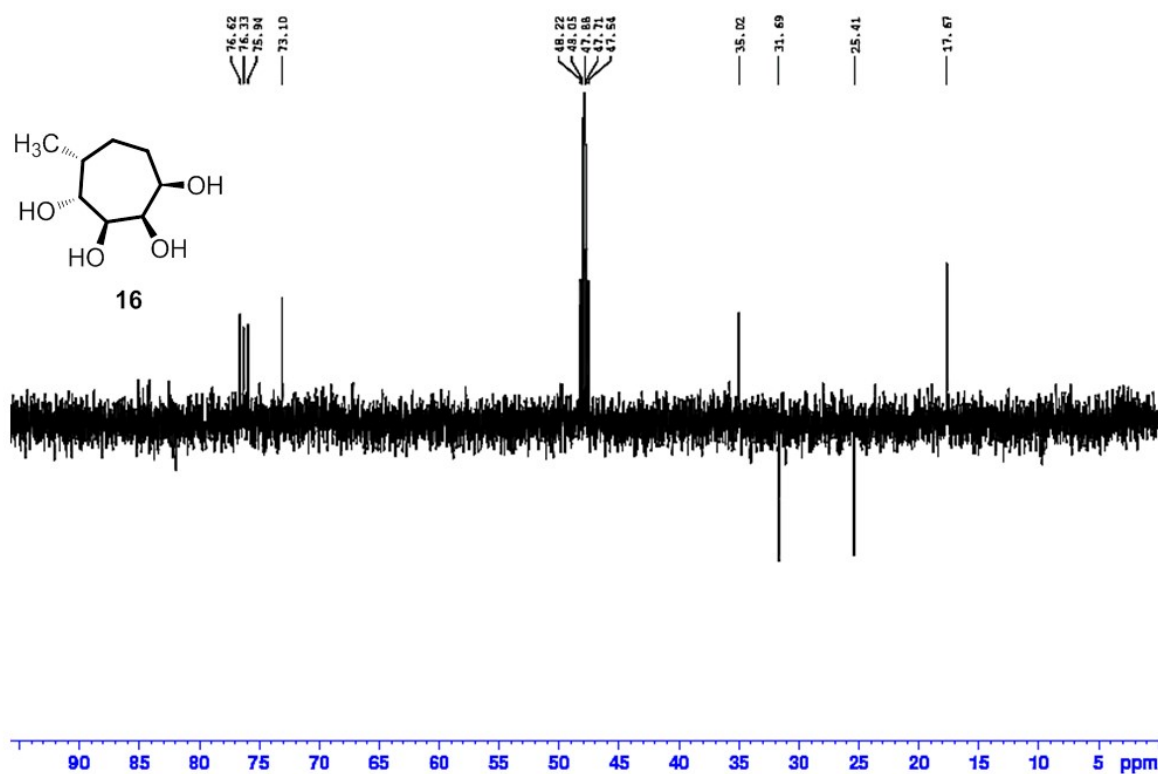

HMQC spectrum of compound **16** recorded in CD<sub>3</sub>OD

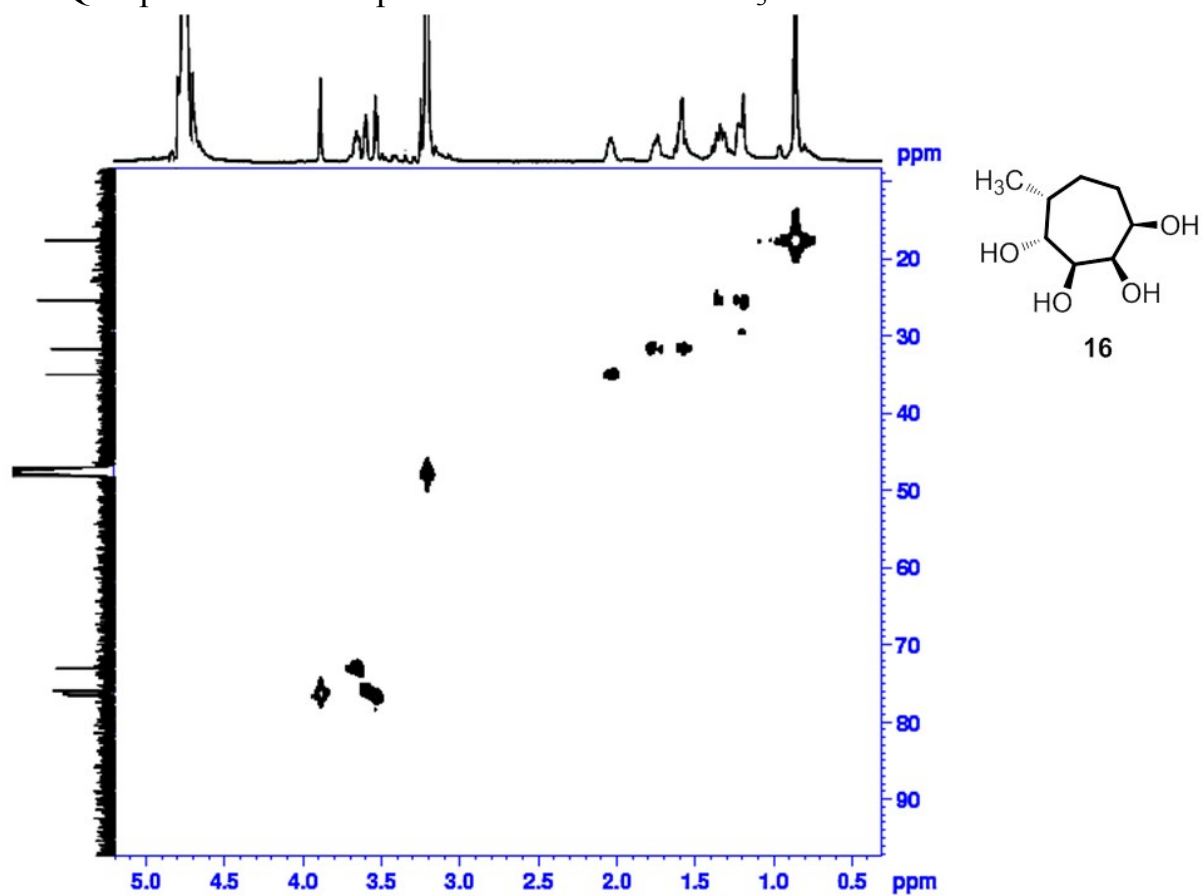

NOESY spectrum of compound **16** recorded in CD<sub>3</sub>OD

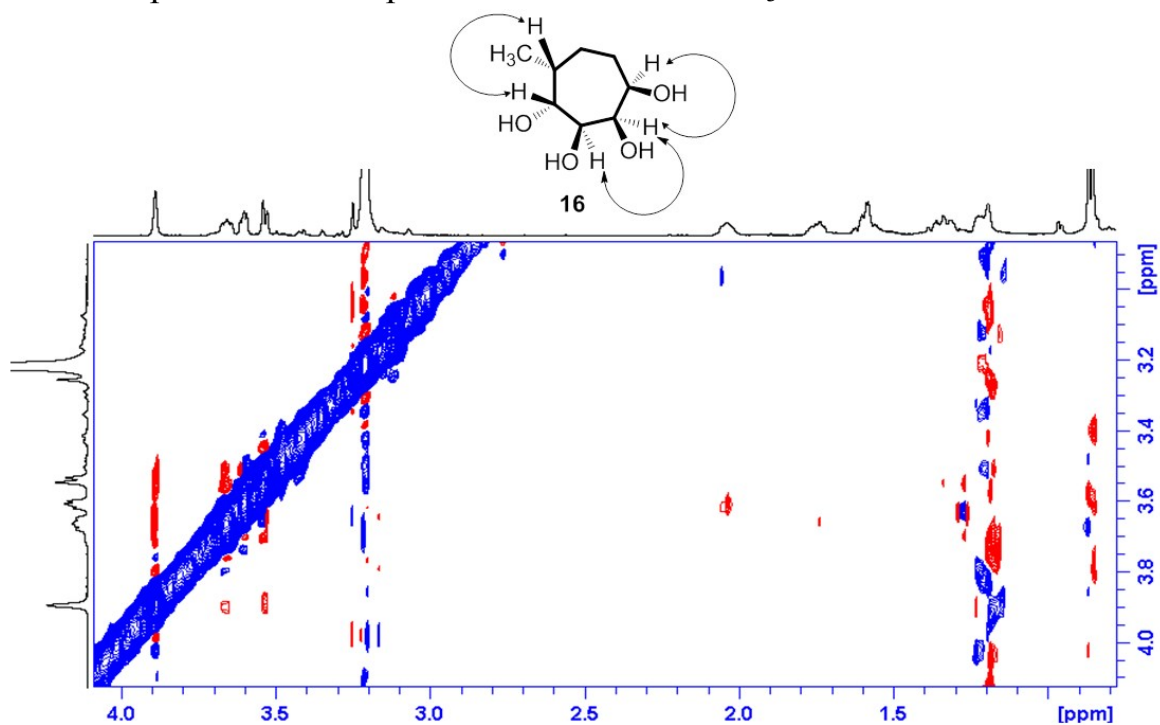

<sup>1</sup>H NMR spectrum of compound **20** recorded in CDCl<sub>3</sub>

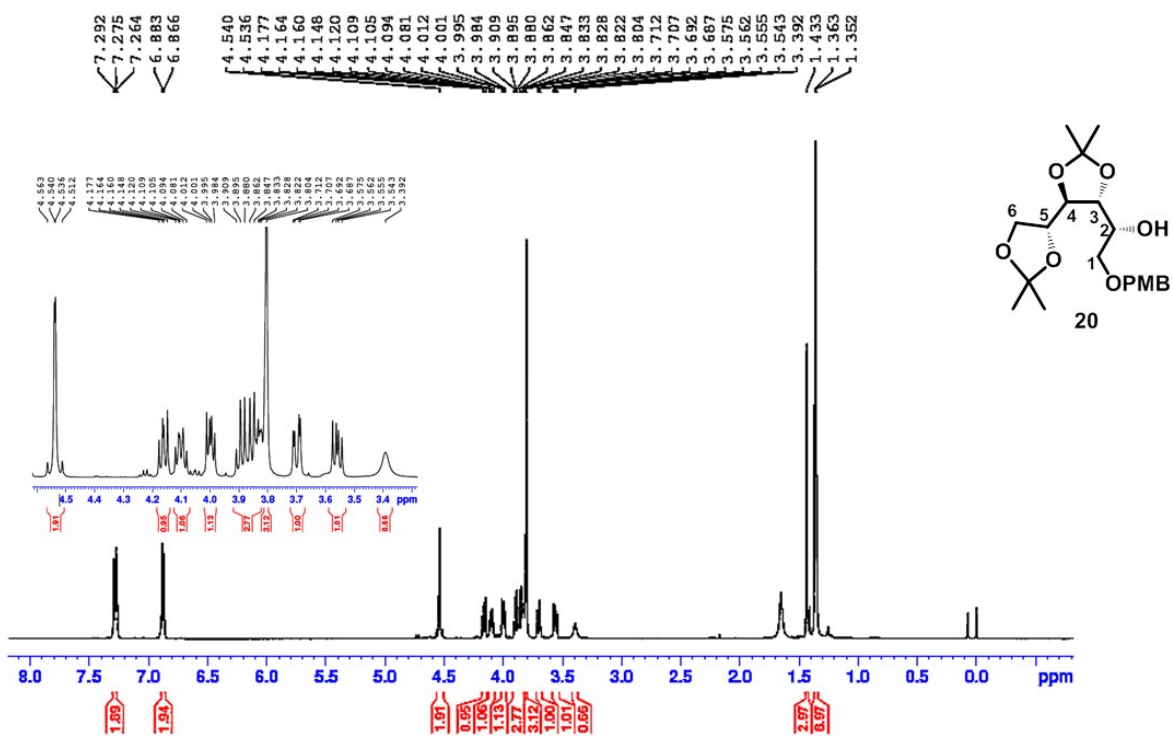

COSY spectrum of compound **20** recorded in CDCl<sub>3</sub>

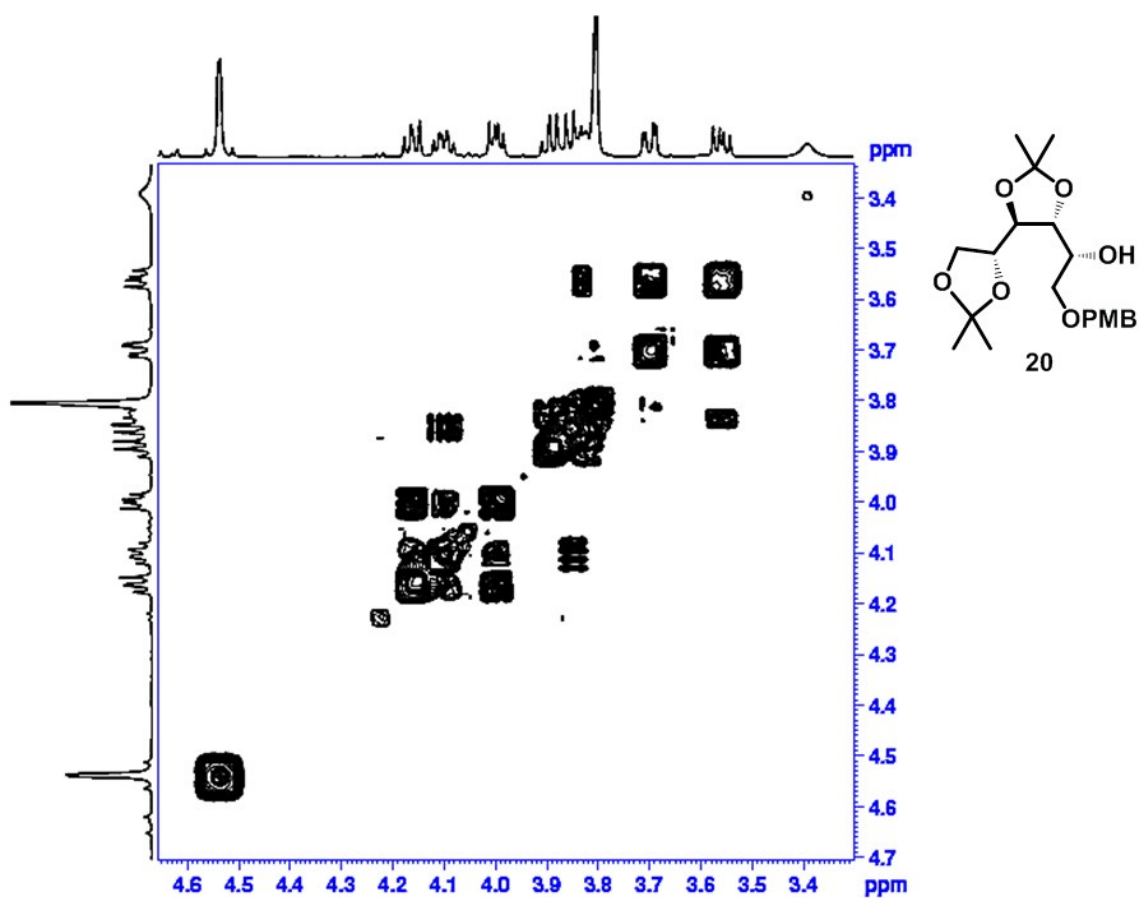

<sup>13</sup>C spectrum of compound **20** recorded in CDCl<sub>3</sub>

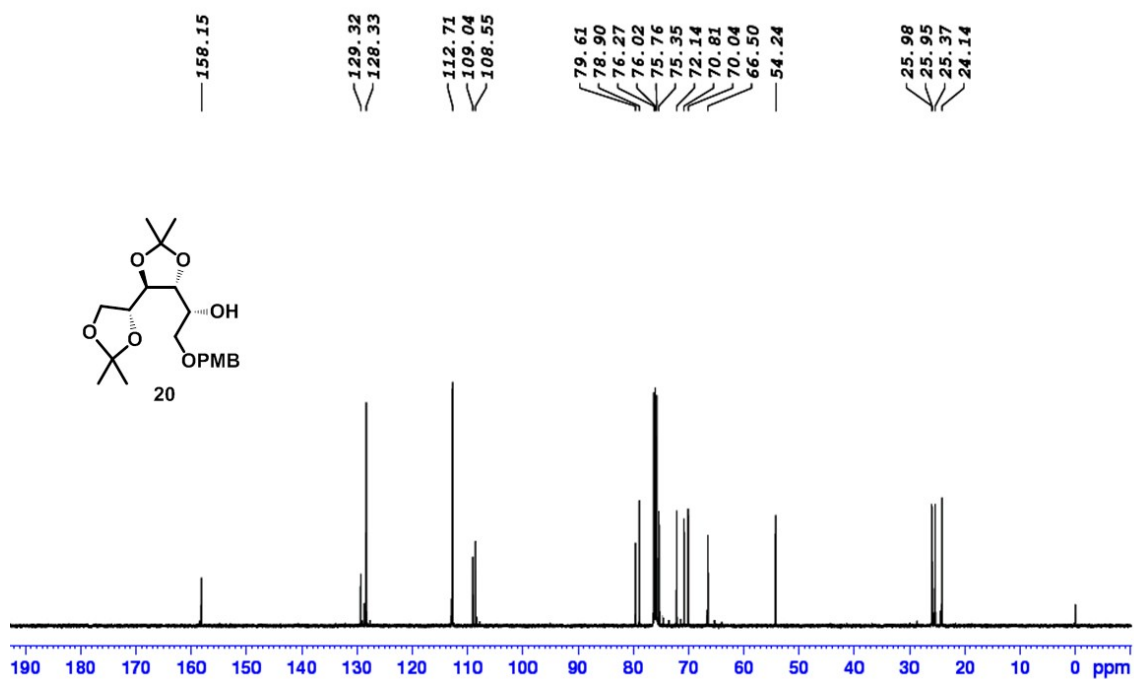

DEPT spectrum of compound **20** recorded in CDCl<sub>3</sub>

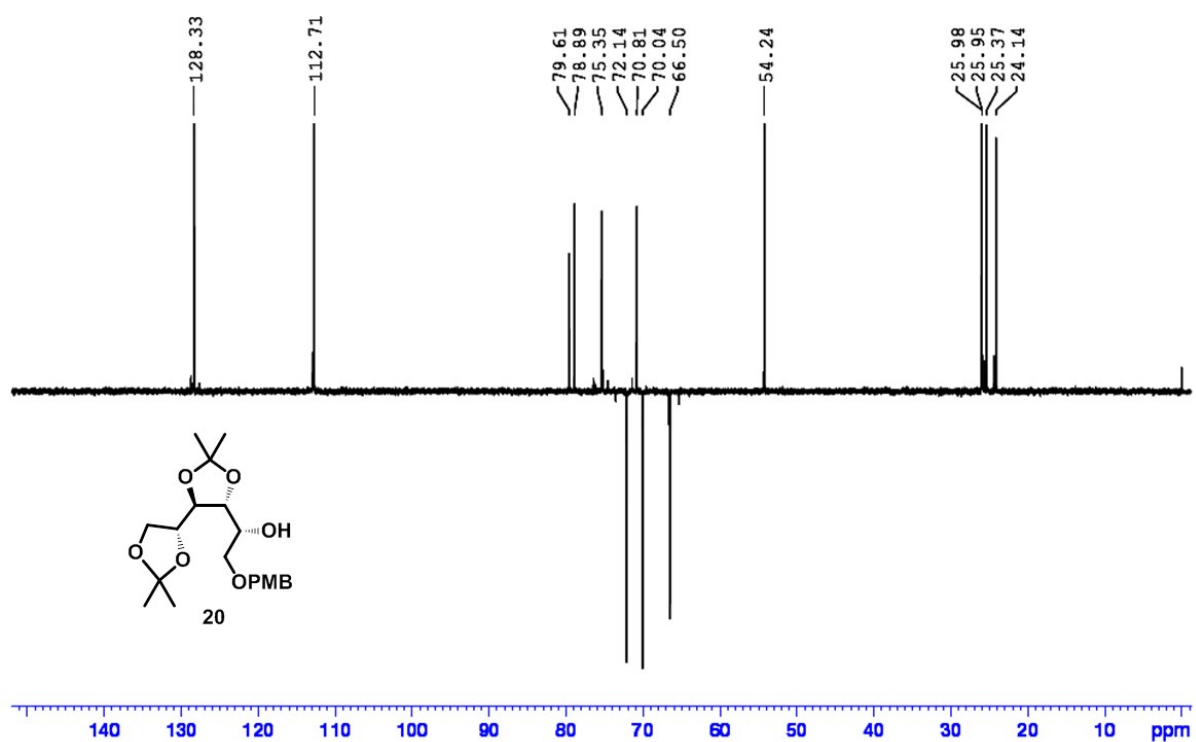

HMQC spectrum of compound **20** recorded in CDCl<sub>3</sub>

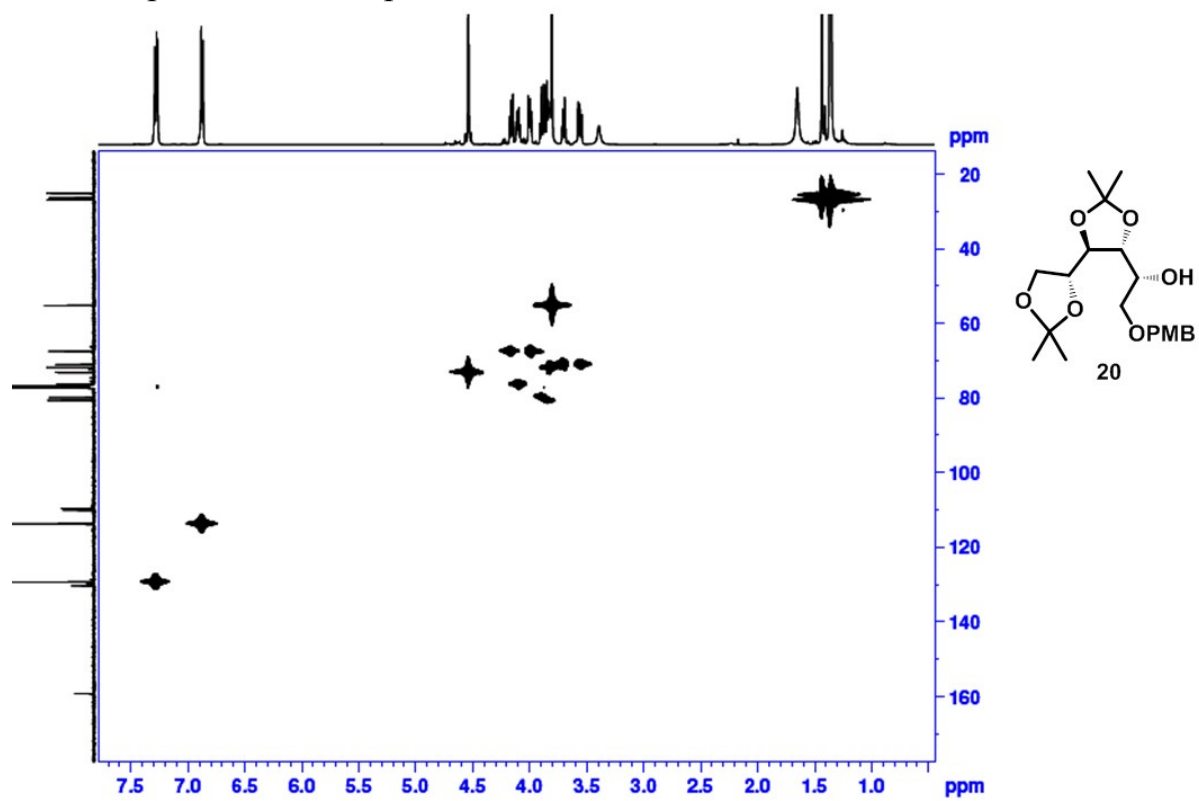

Expanded HMQC spectrum of compound **20** recorded in CDCl<sub>3</sub>

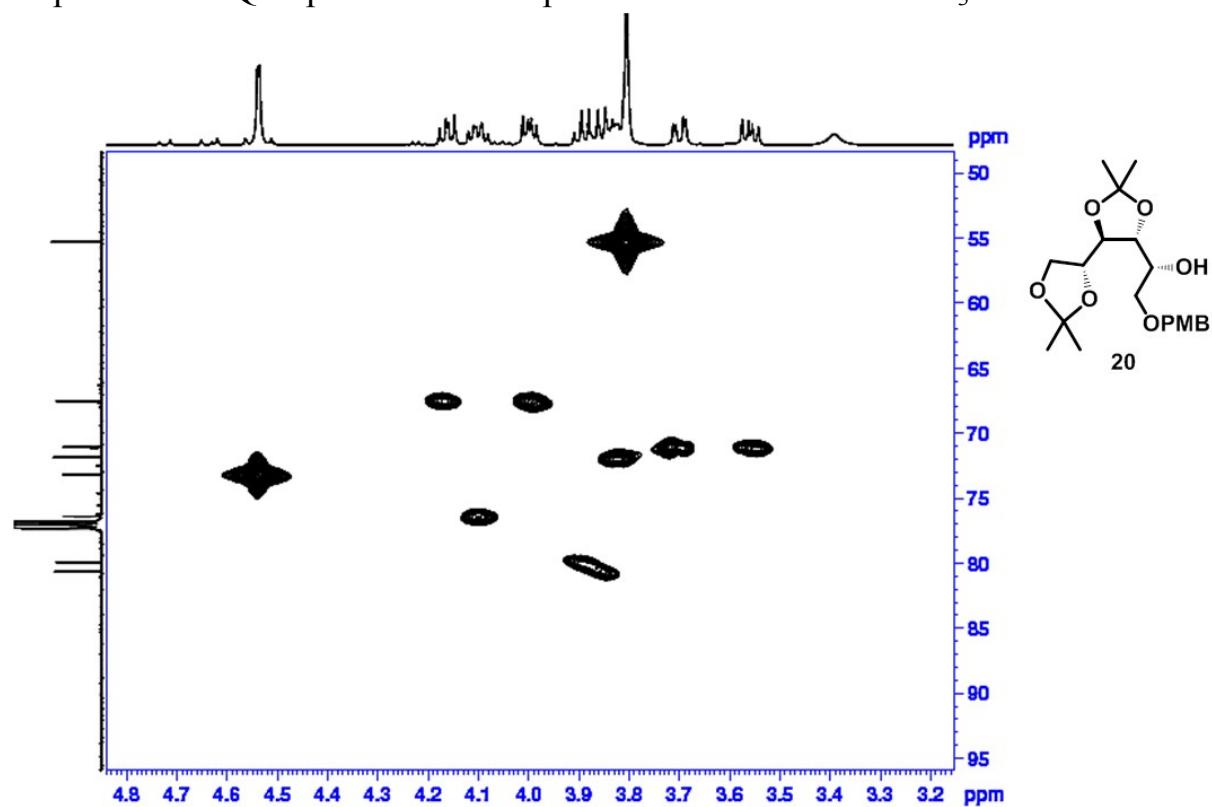

HMBC spectrum of compound **20** recorded in CDCl<sub>3</sub>

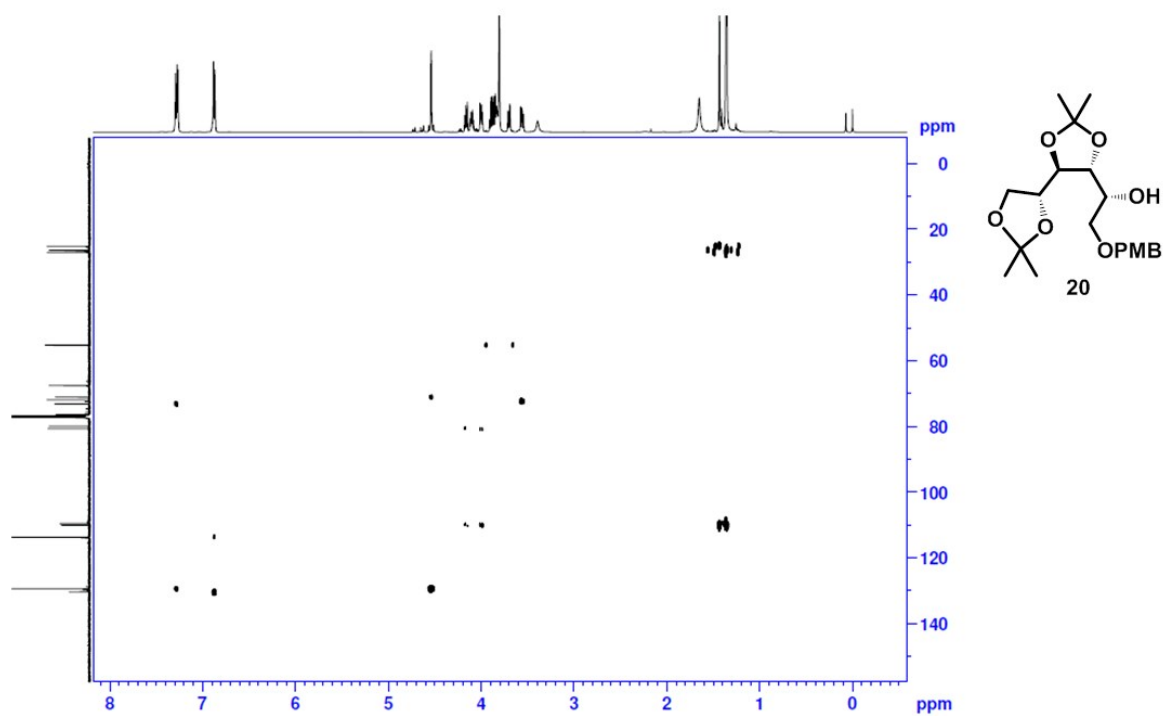



Expanded HMBC spectrum of compound **20** recorded in CDCl<sub>3</sub>

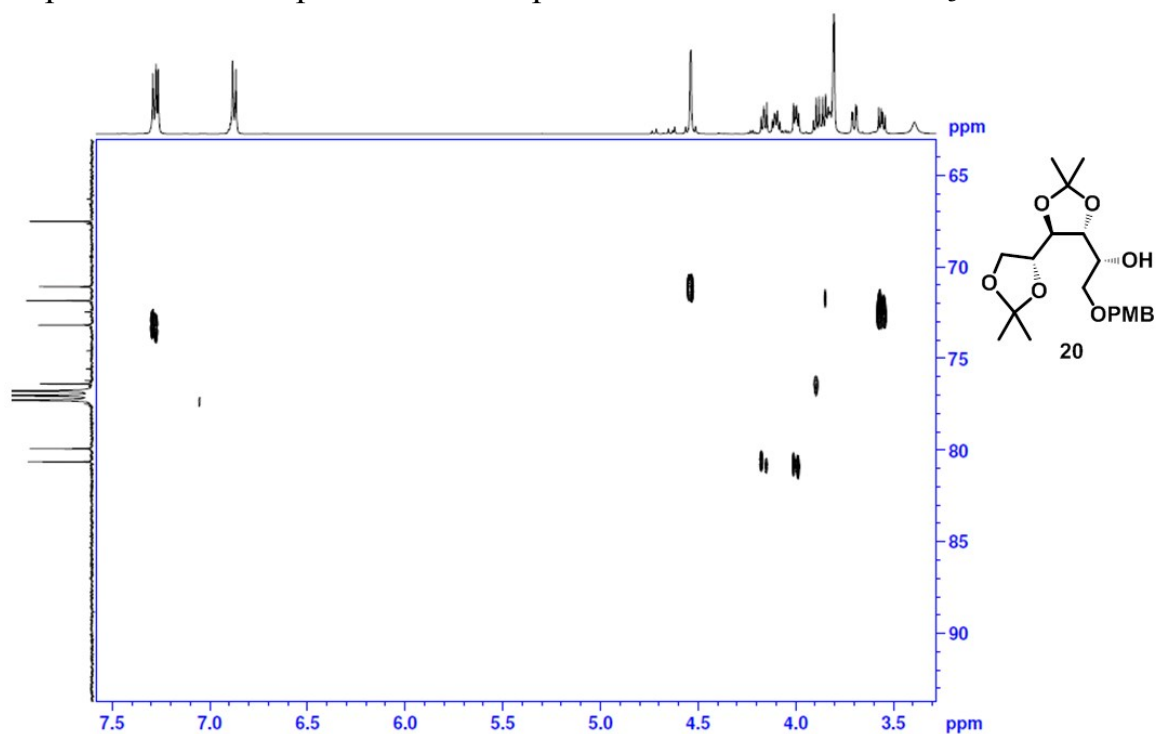

<sup>1</sup>H NMR spectrum of compound **21** recorded in CDCl<sub>3</sub>

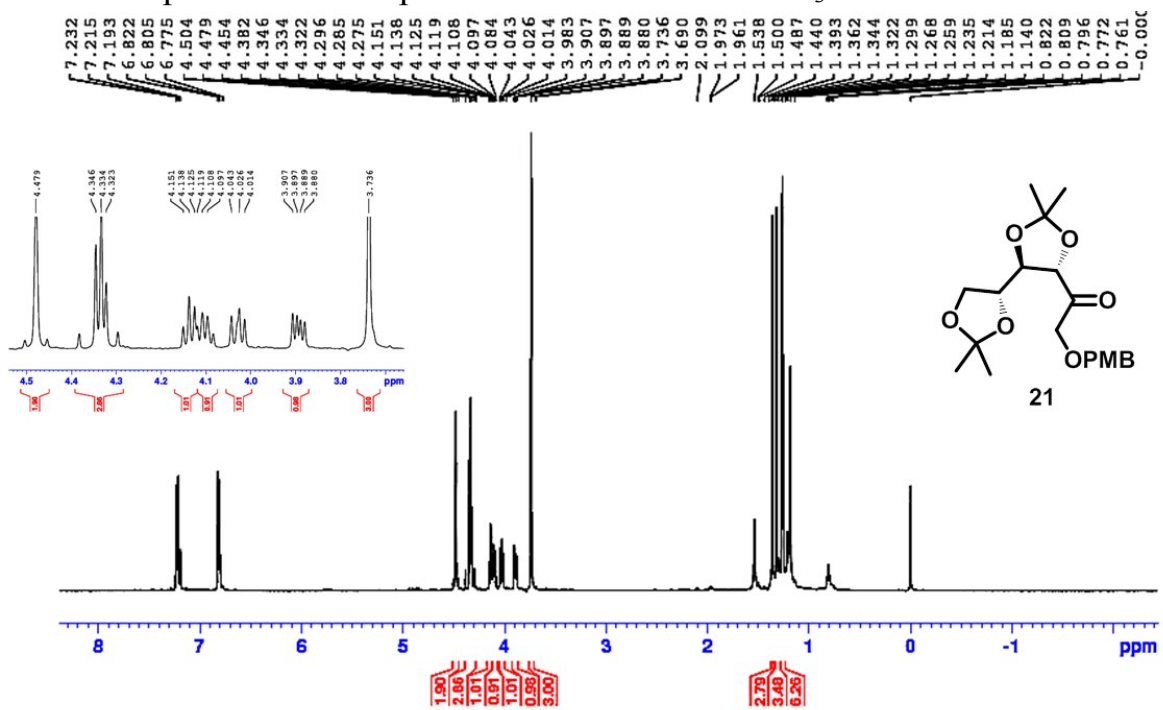

COSY spectrum of compound **21** recorded in CDCl<sub>3</sub>

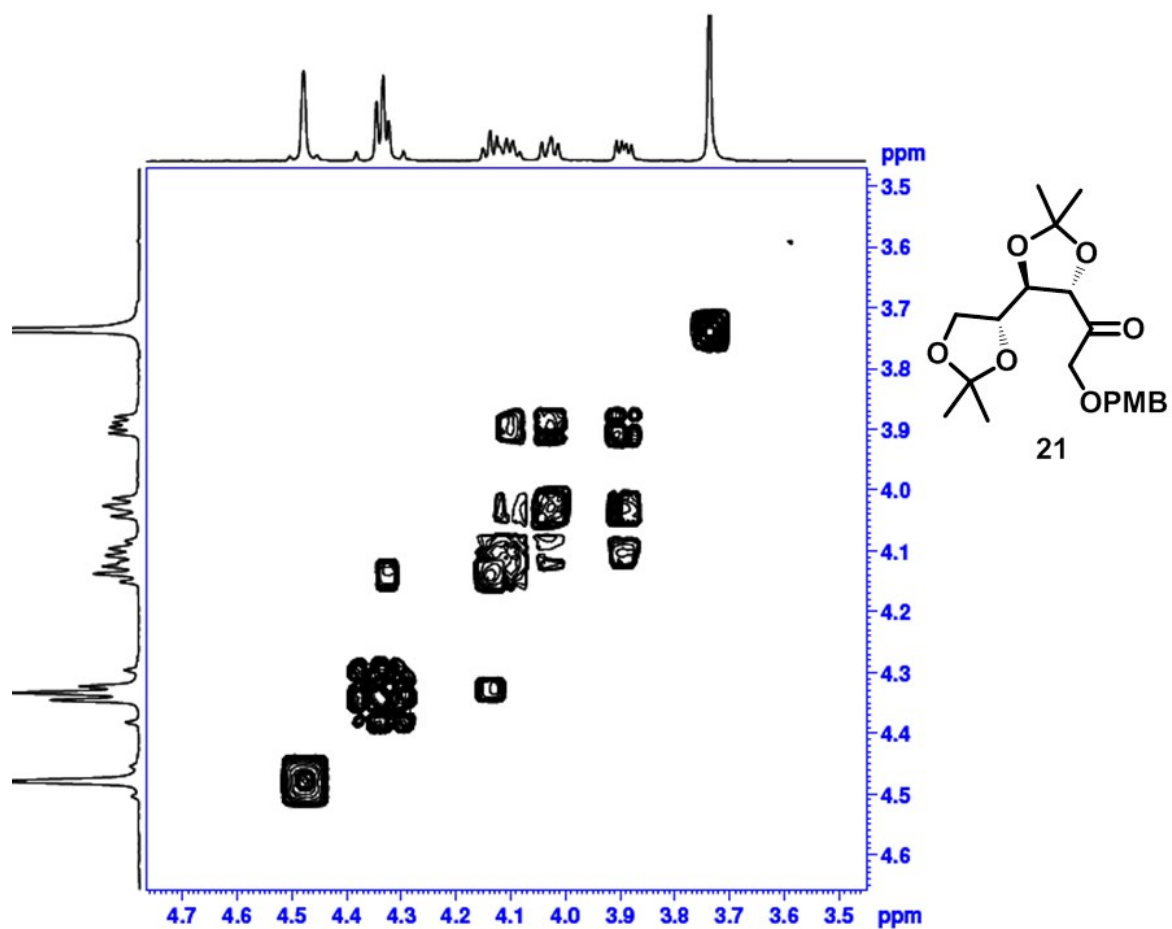

<sup>13</sup>C spectrum of compound **21** recorded in CDCl<sub>3</sub>

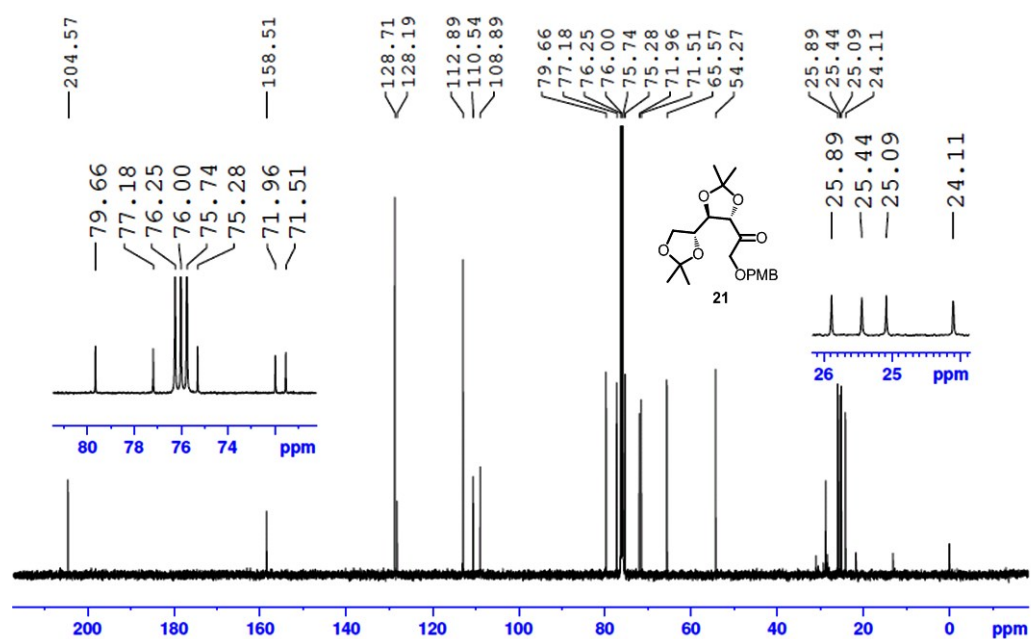

DEPT spectrum of compound **21** recorded in CDCl<sub>3</sub>

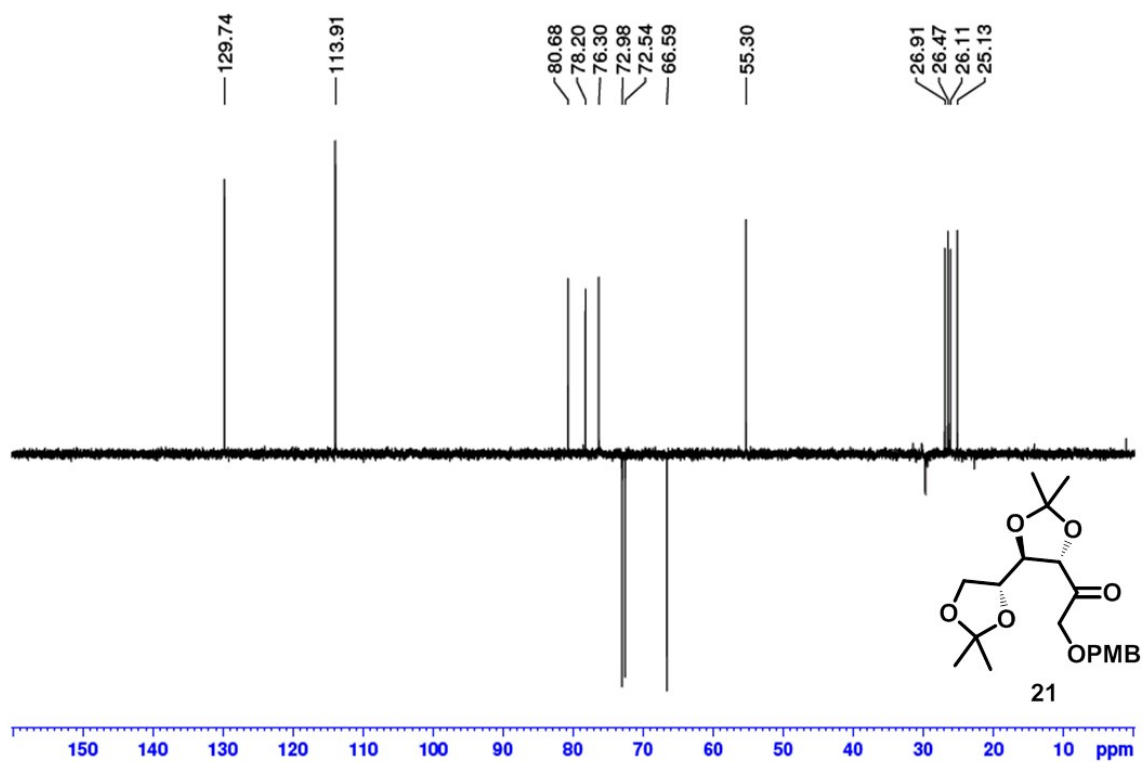

HMQC spectrum of compound **21** recorded in CDCl<sub>3</sub>

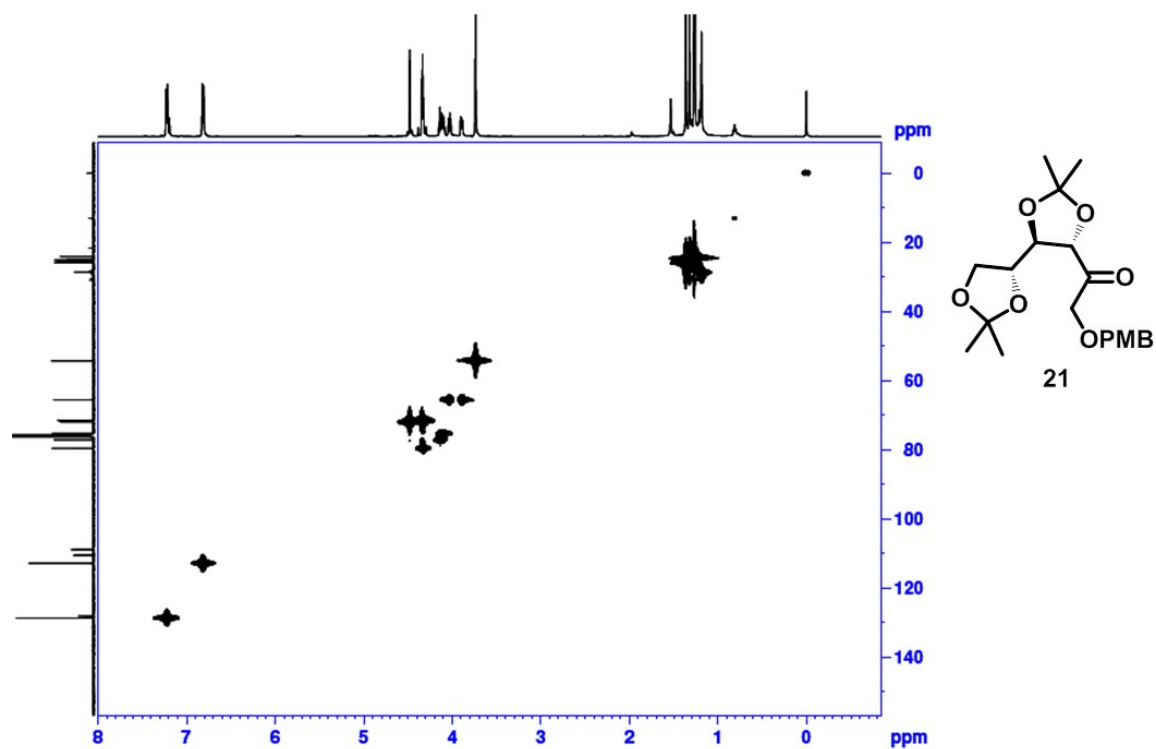

$^1\text{H}$  NMR spectrum of compound **22** recorded in  $\text{CDCl}_3$

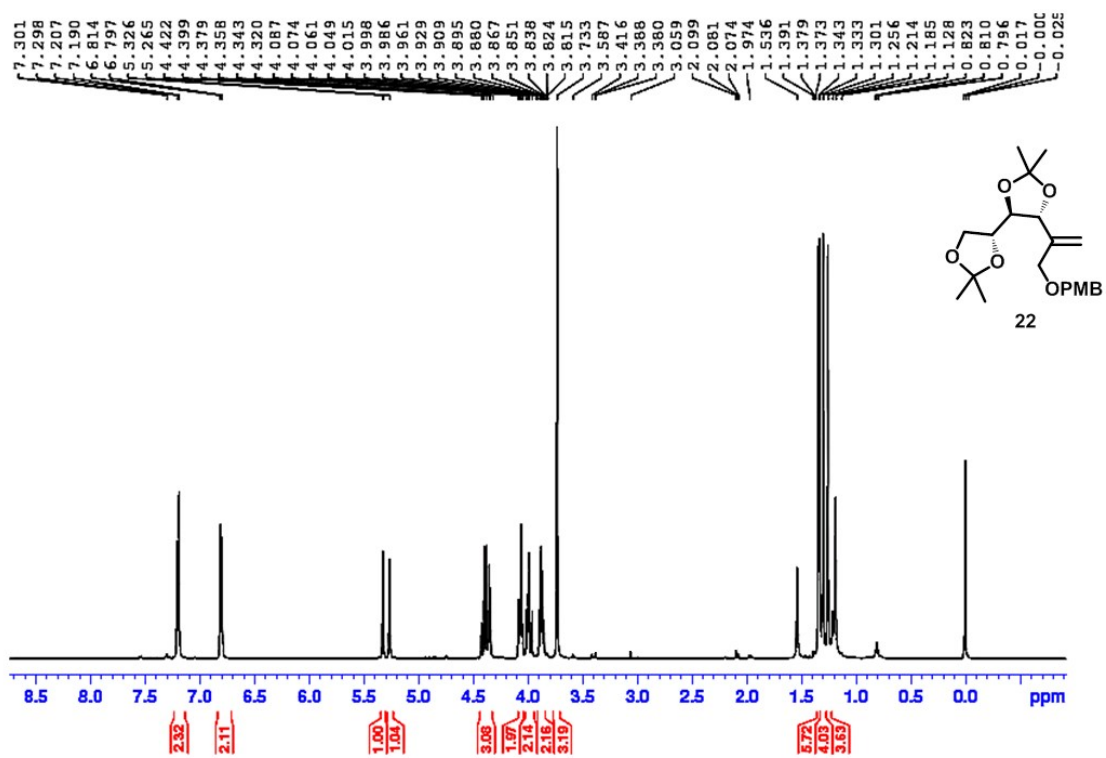

COSY spectrum of compound **22** recorded in  $\text{CDCl}_3$

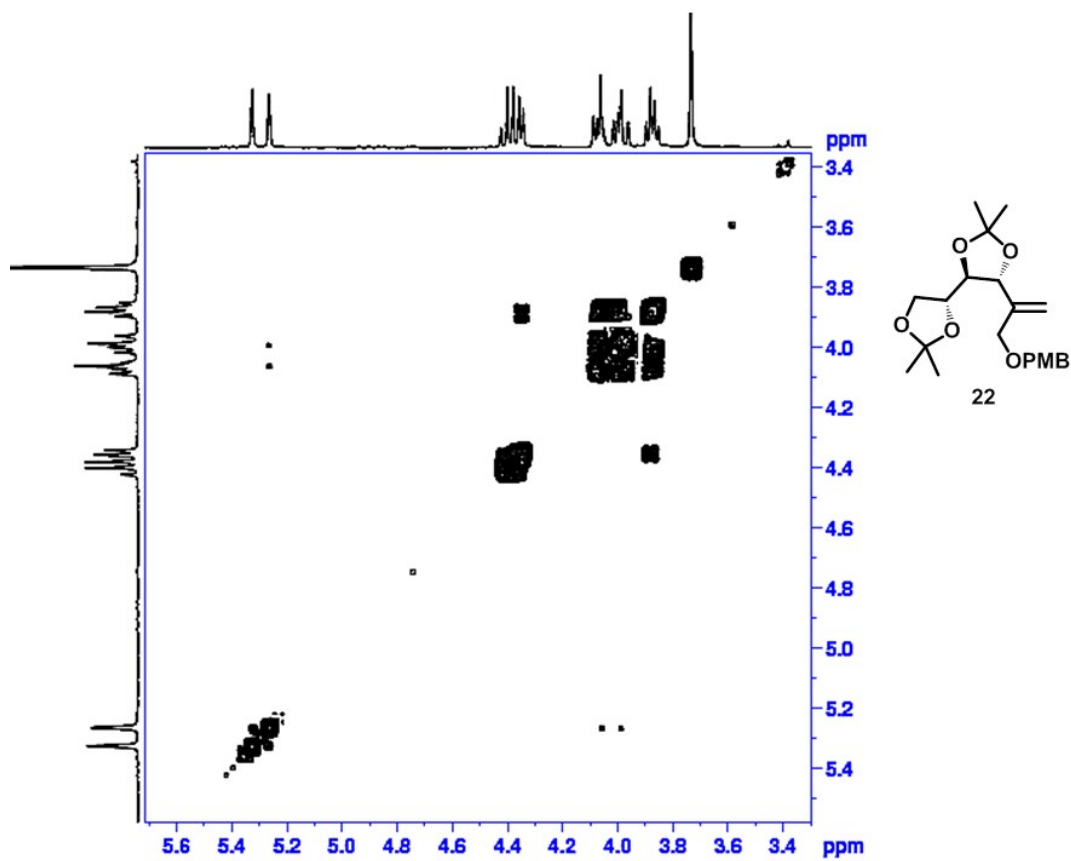



HMQC spectrum of compound **22** recorded in CDCl<sub>3</sub>

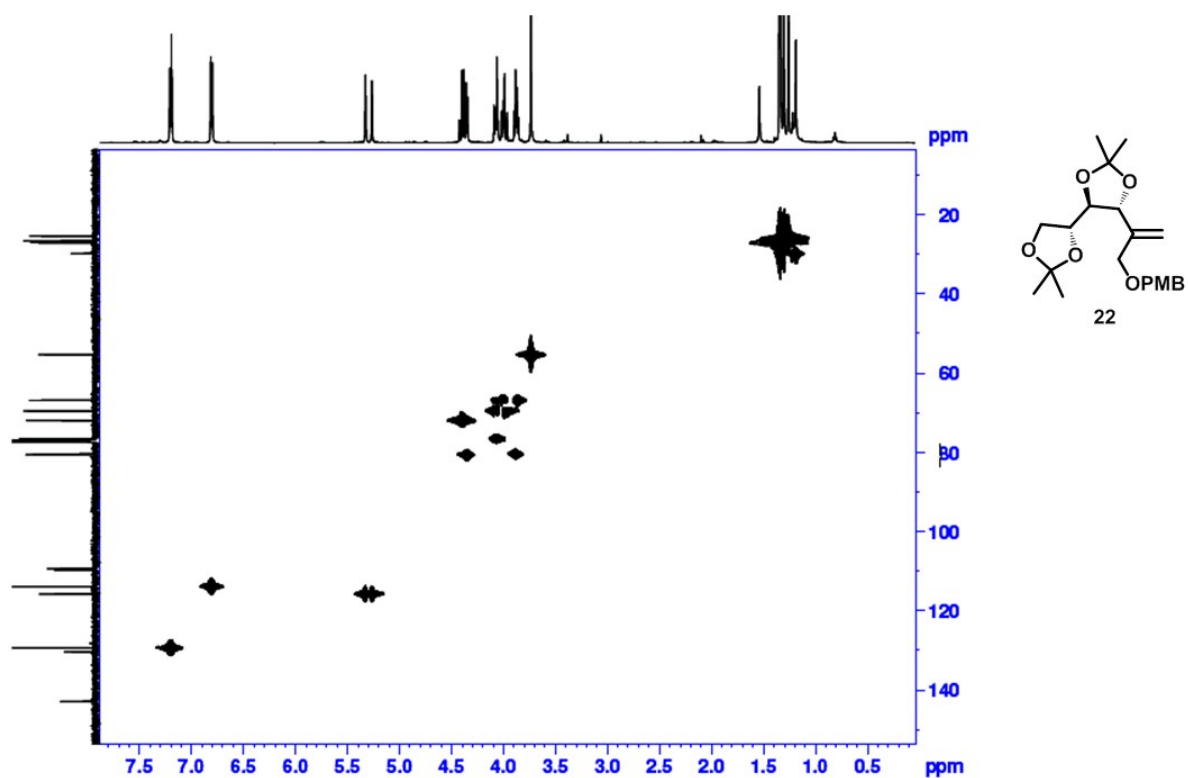

Expanded HMQC spectrum of compound **22** recorded in CDCl<sub>3</sub>

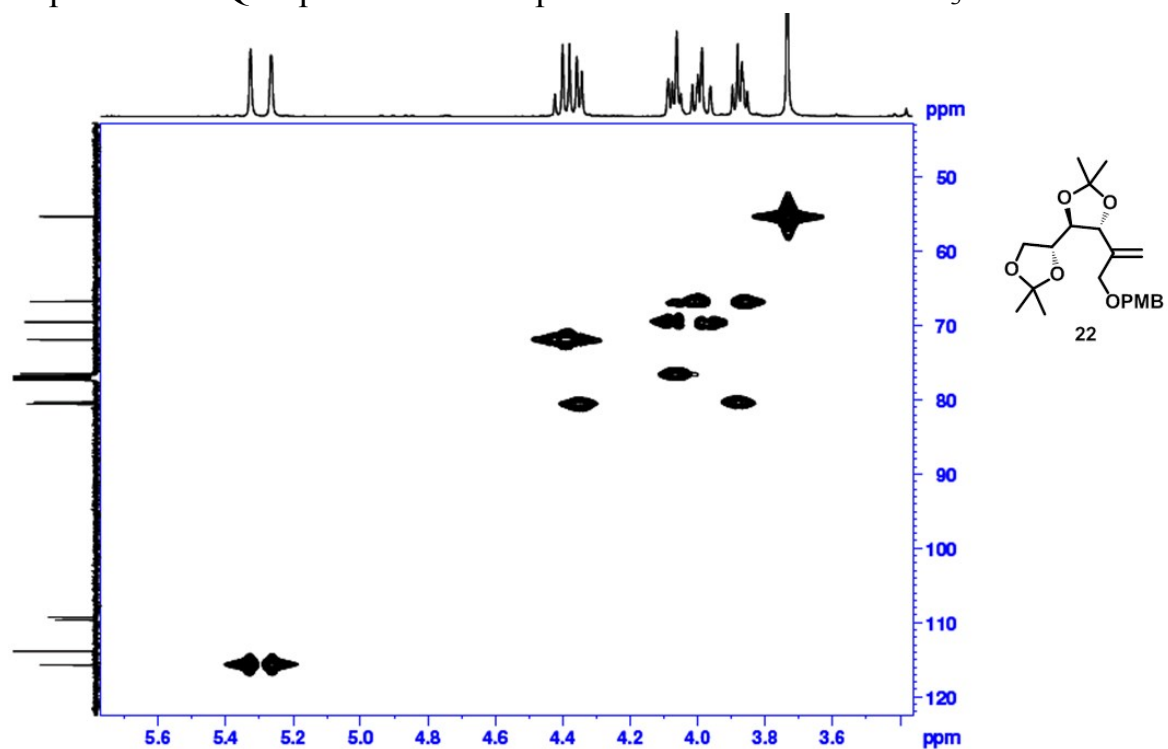

HMBC spectrum of compound **22** recorded in CDCl<sub>3</sub>

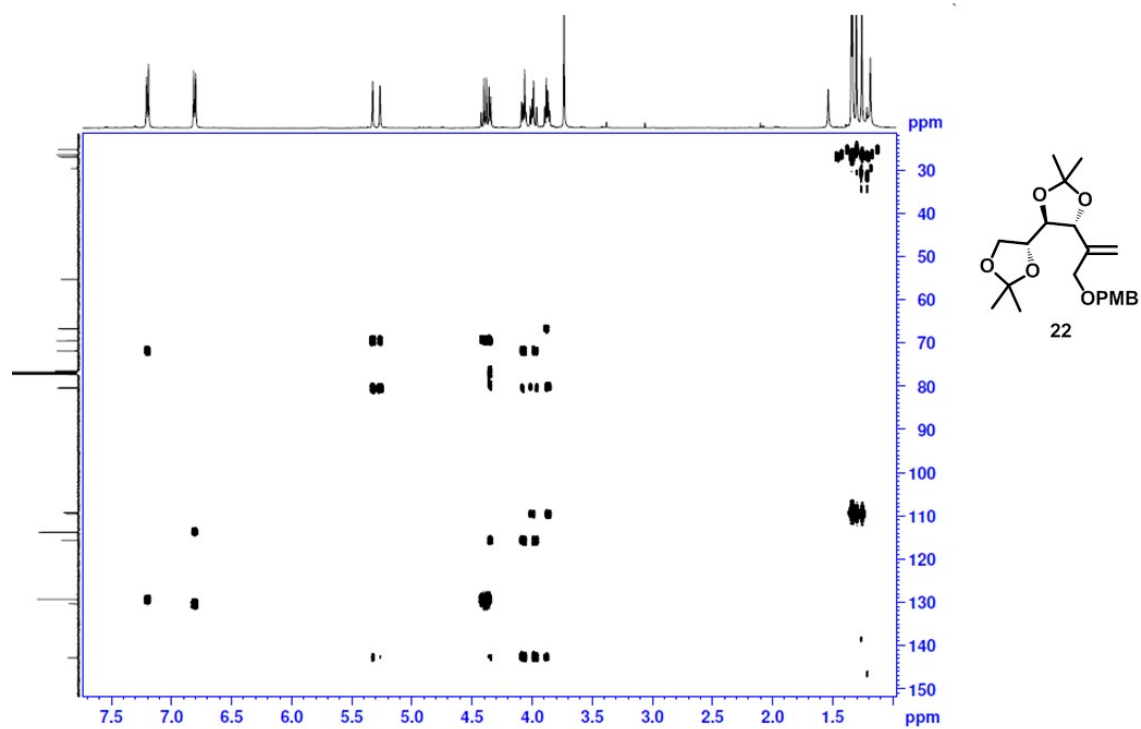

Expanded HMBC spectrum of compound **22** recorded in CDCl<sub>3</sub>

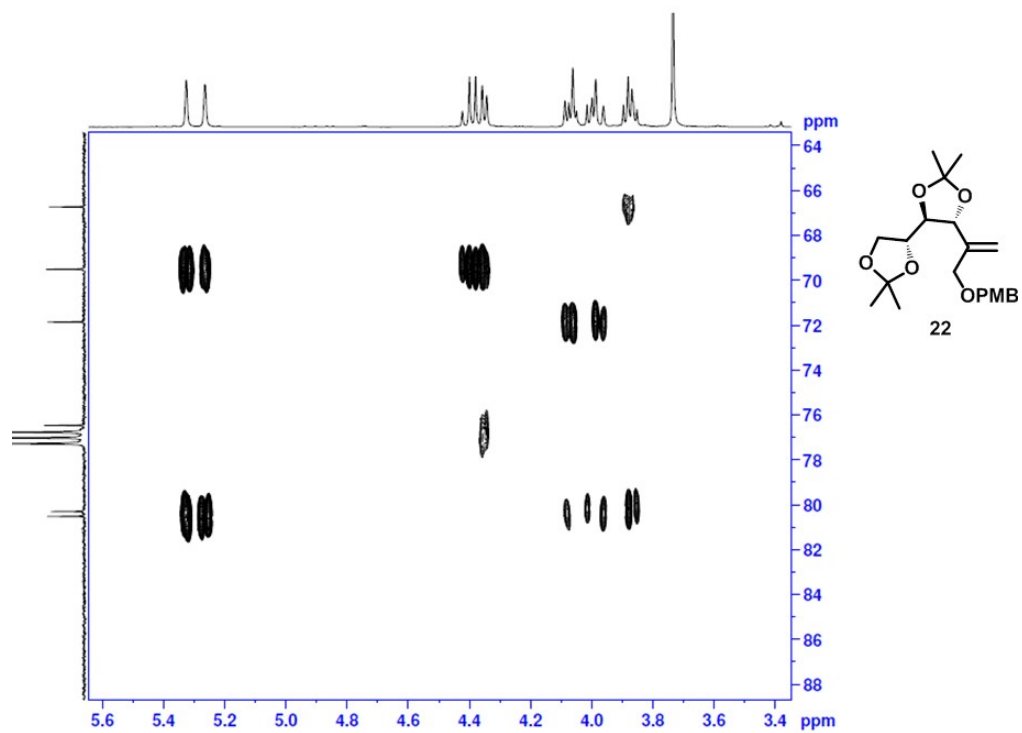

$^1\text{H}$  NMR spectrum of compound **23** recorded in  $\text{CD}_3\text{OD}$

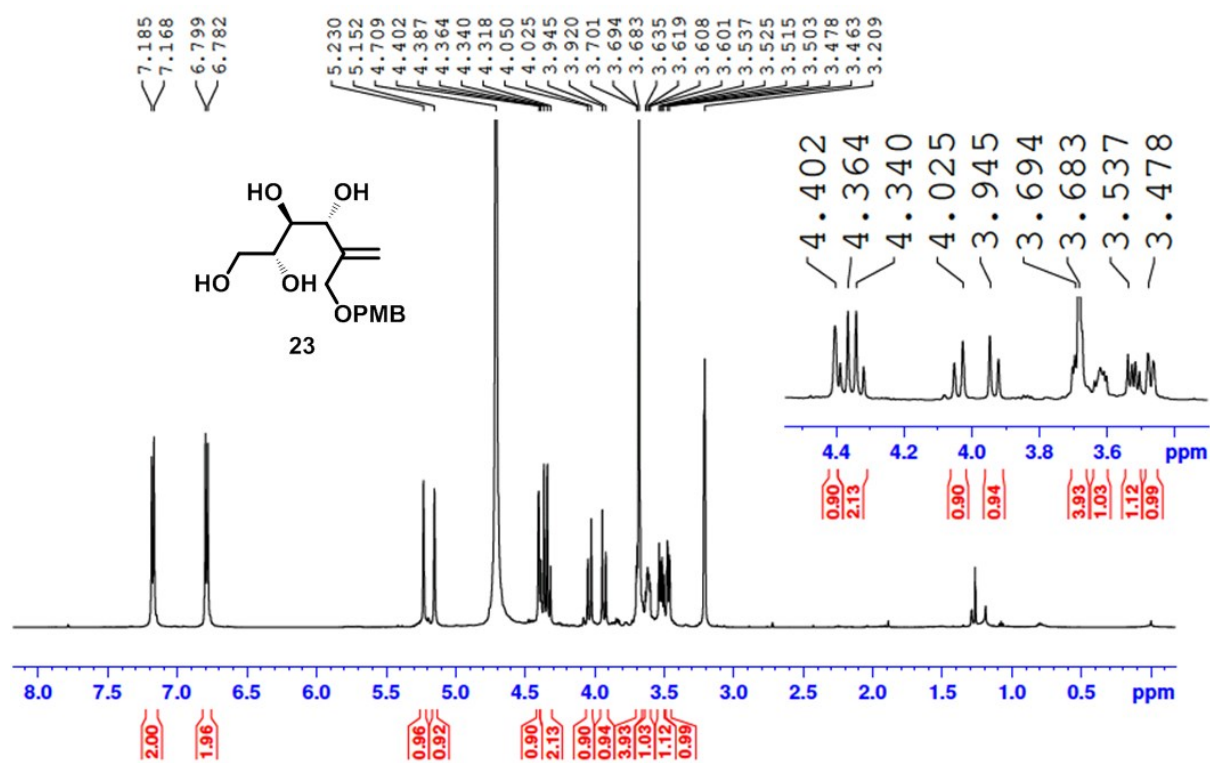

COSY spectrum of compound **23** recorded in  $\text{CD}_3\text{OD}$

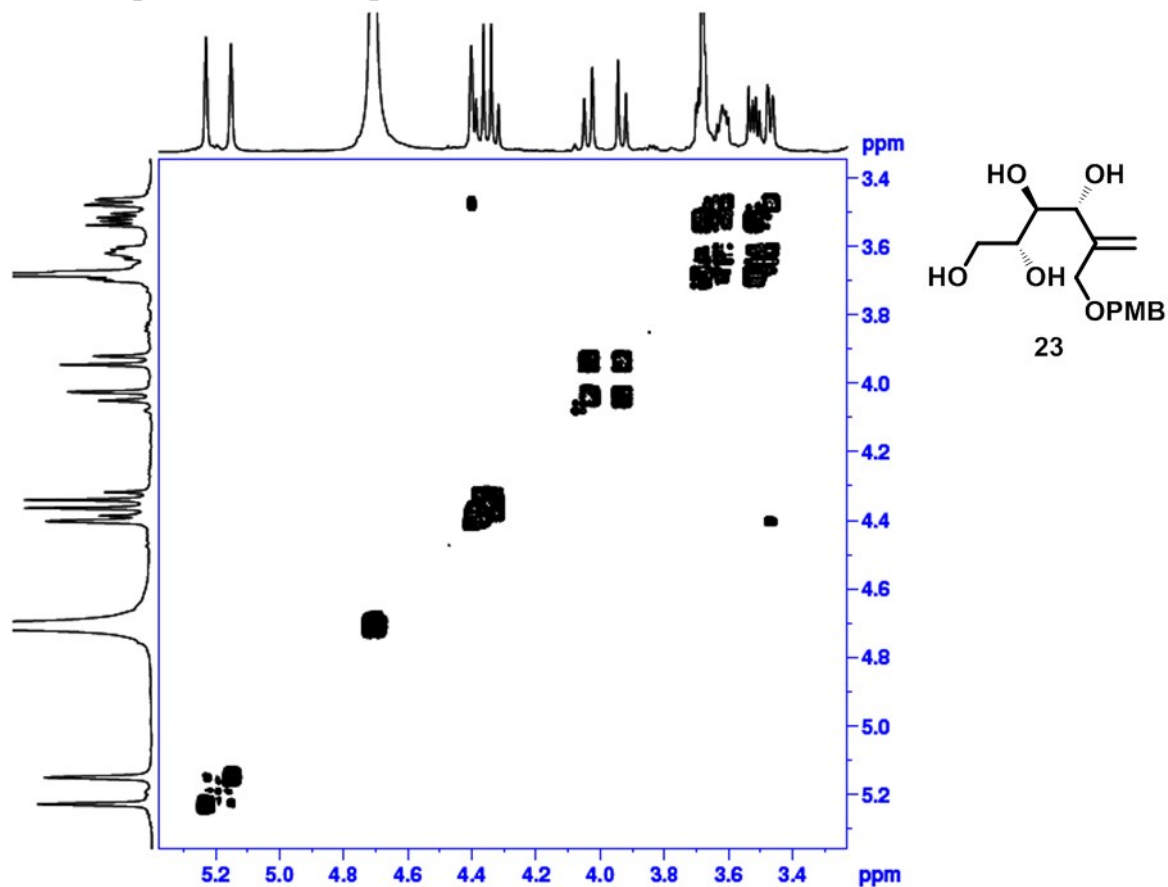



$^{13}\text{C}$  spectrum of compound **23** recorded in  $\text{CD}_3\text{OD}$

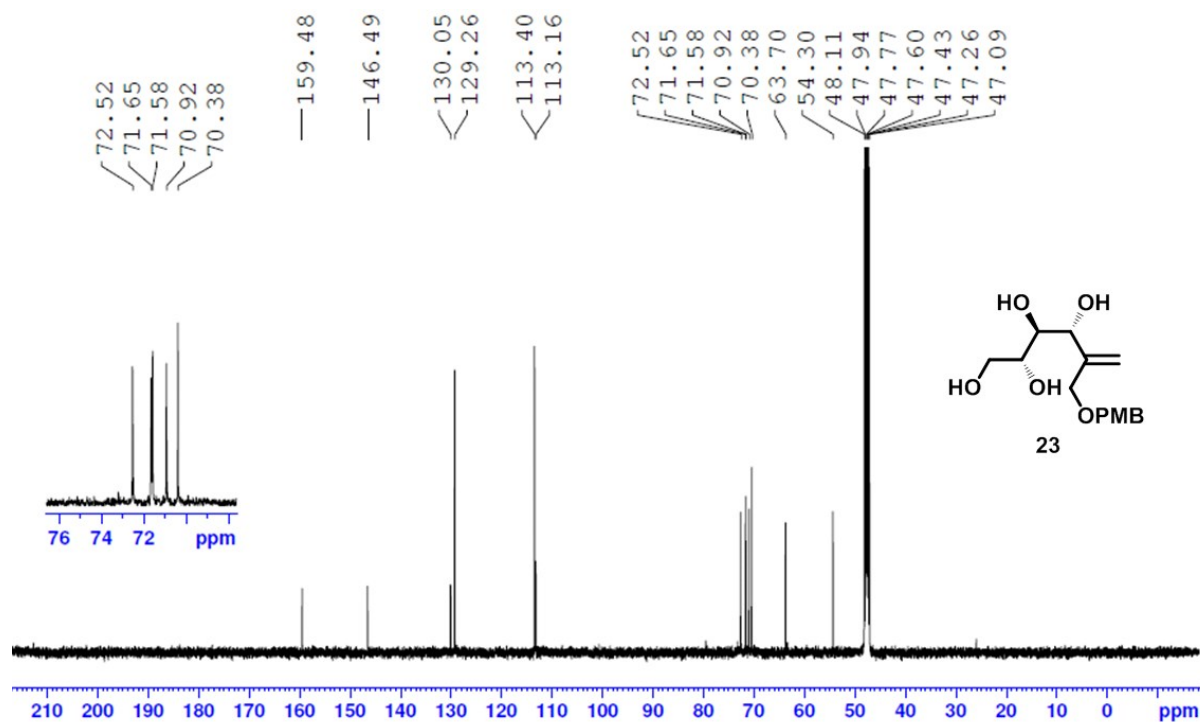

DEPT spectrum of compound **23** recorded in  $\text{CD}_3\text{OD}$

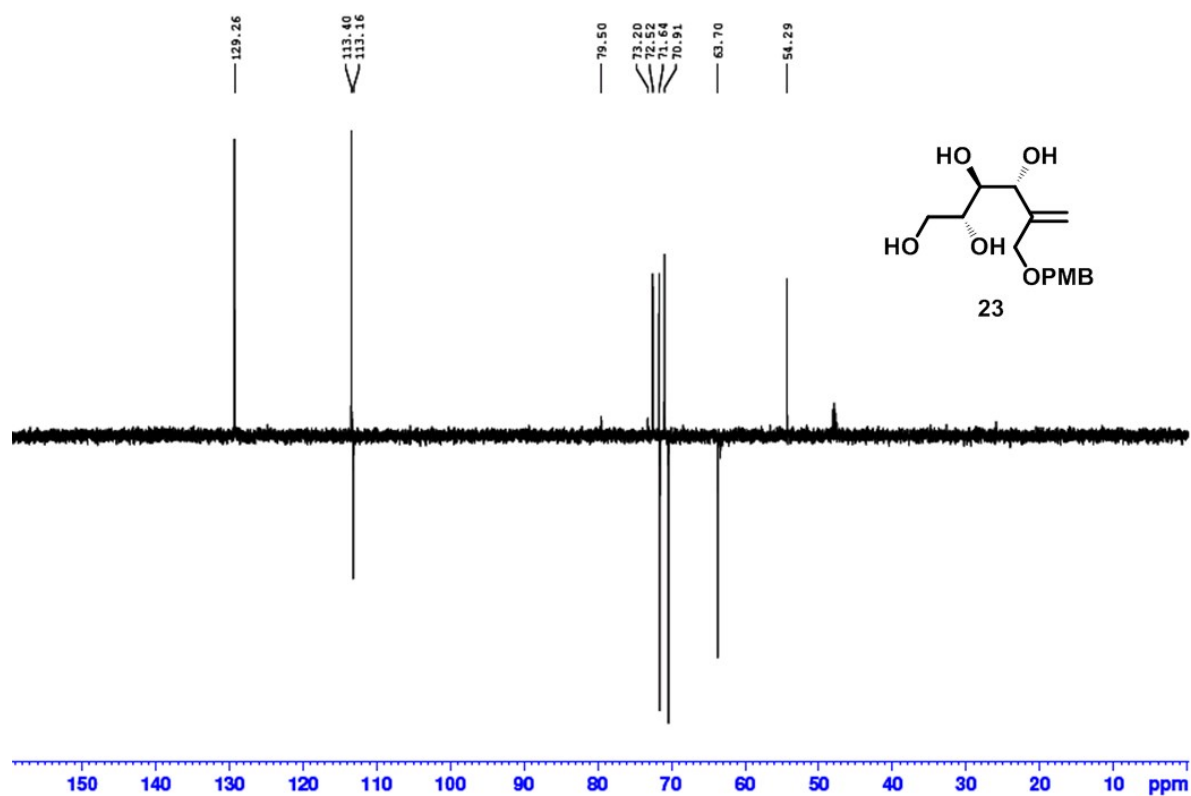

HMQC spectrum of compound **23** recorded in CD<sub>3</sub>OD

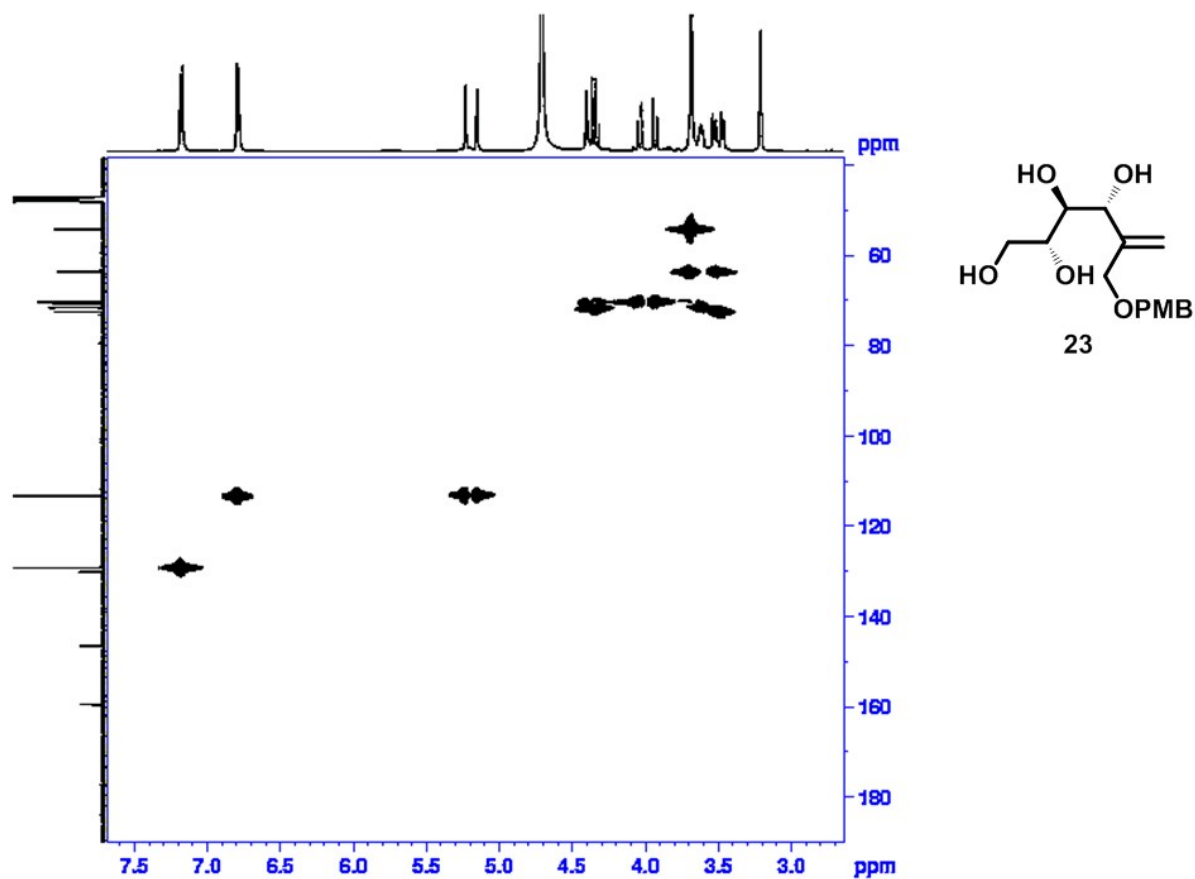

<sup>1</sup>H NMR spectrum of compound **24** recorded in CDCl<sub>3</sub>

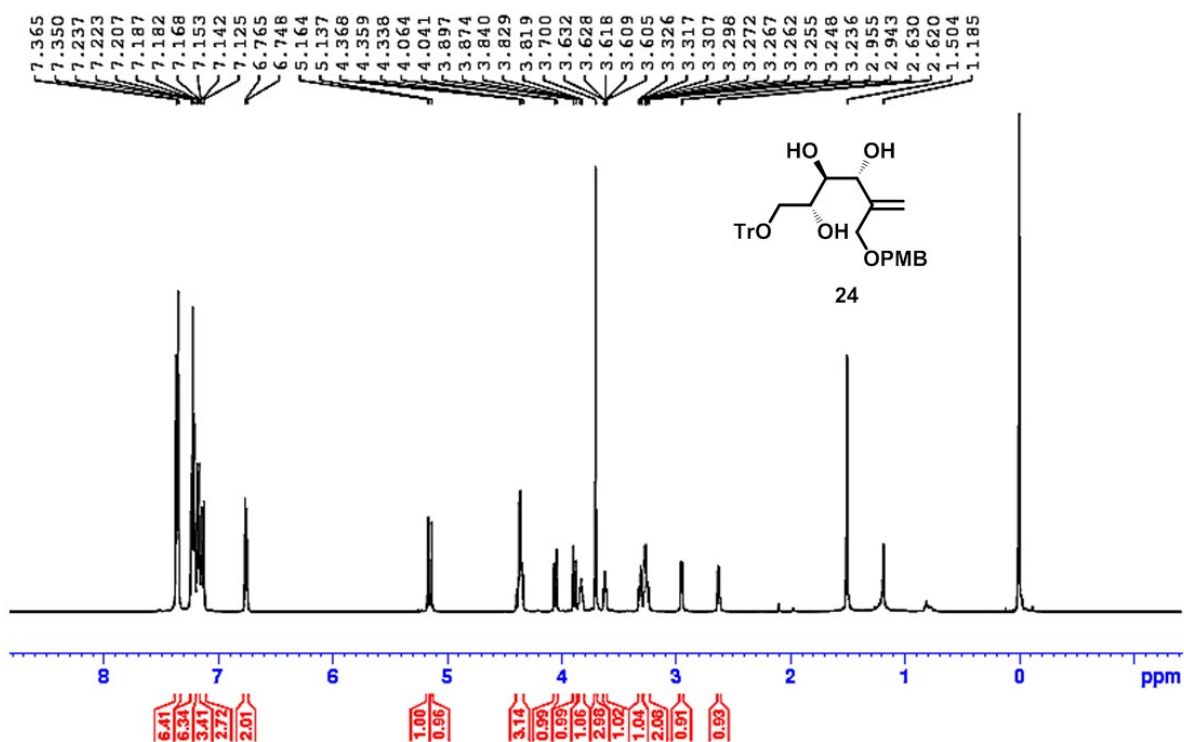

COSY spectrum of compound **24** recorded in CDCl<sub>3</sub>

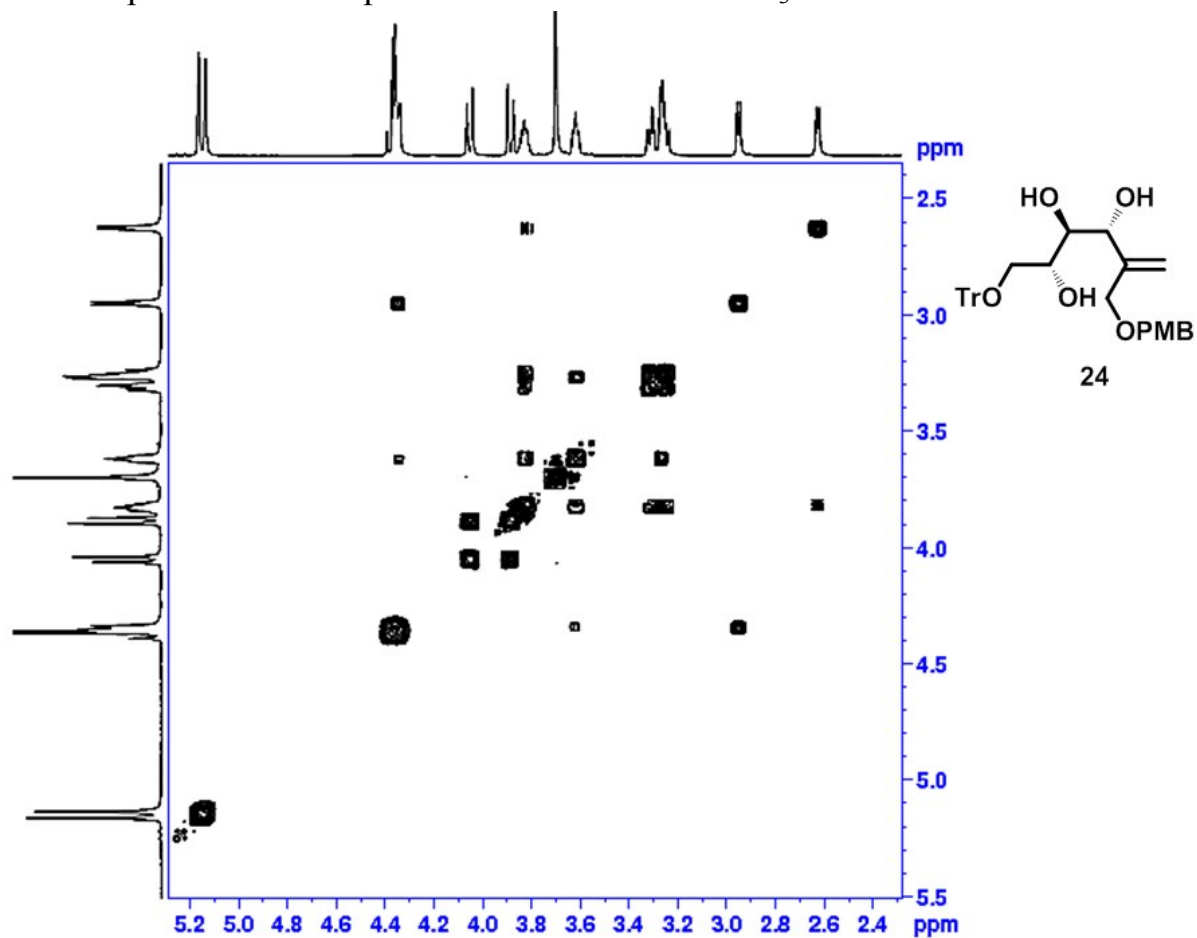

<sup>13</sup>C spectrum of compound **24** recorded in CDCl<sub>3</sub>

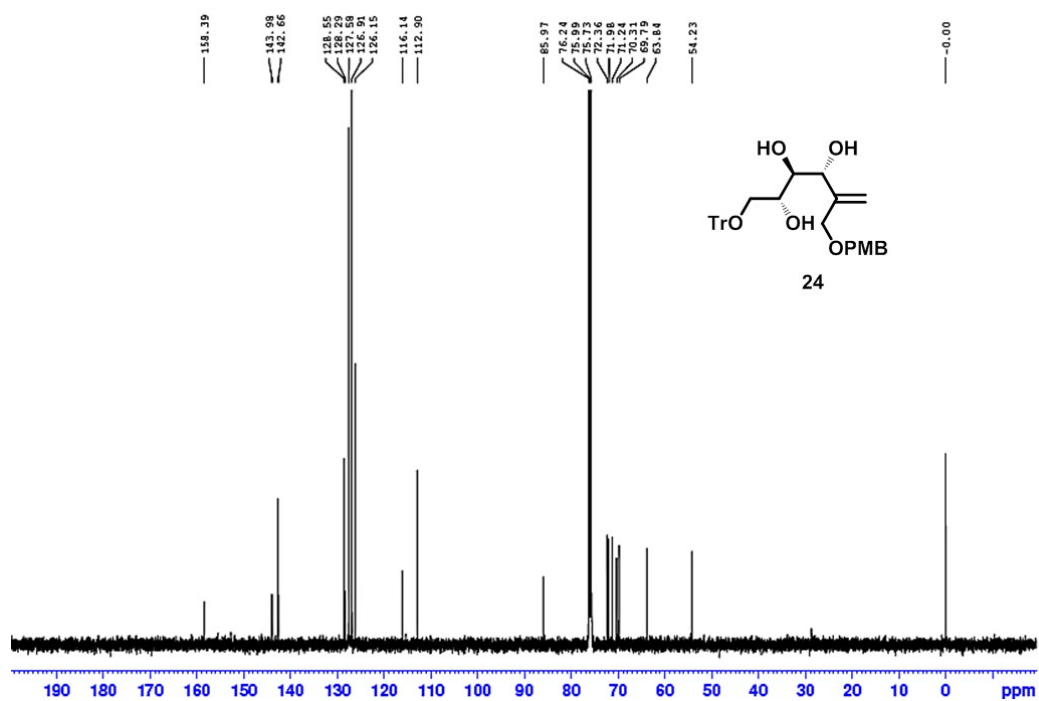

DEPT spectrum of compound **24** recorded in CDCl<sub>3</sub>

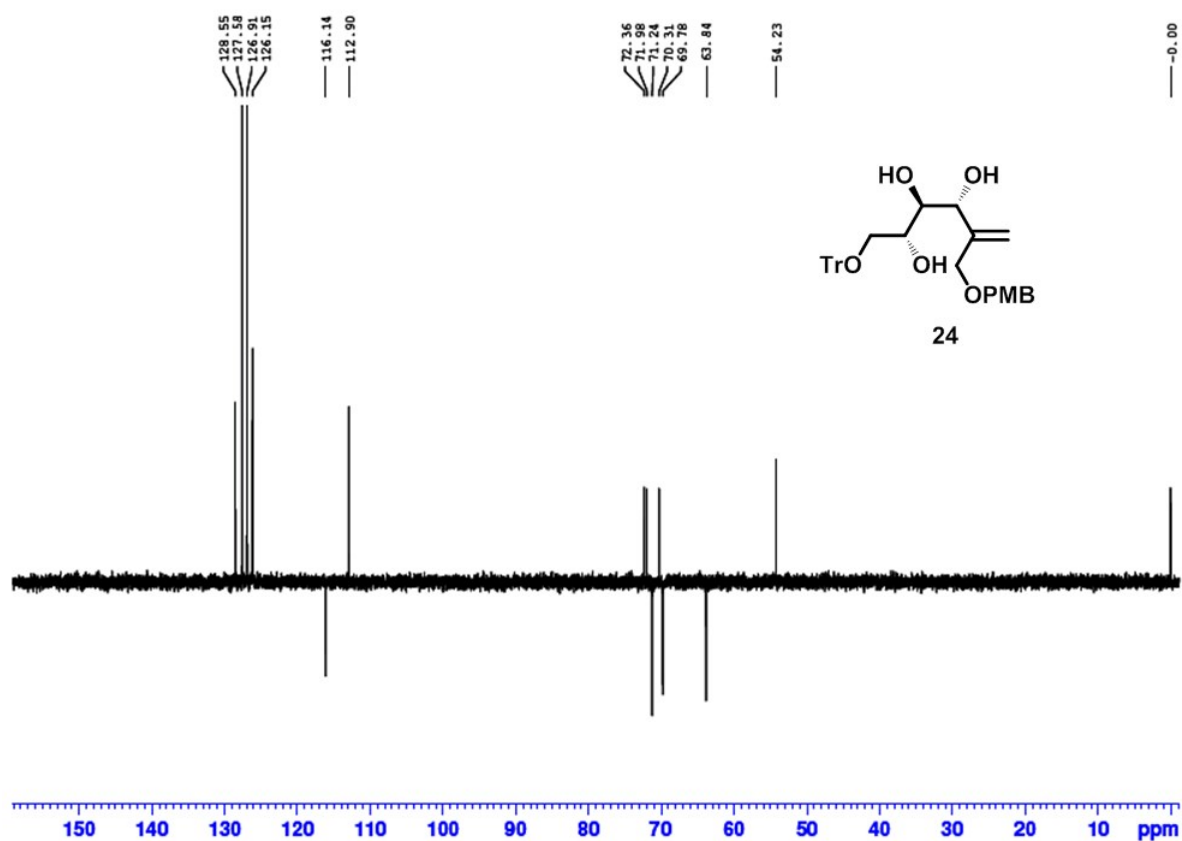

HMQC spectrum of compound **24** recorded in CDCl<sub>3</sub>

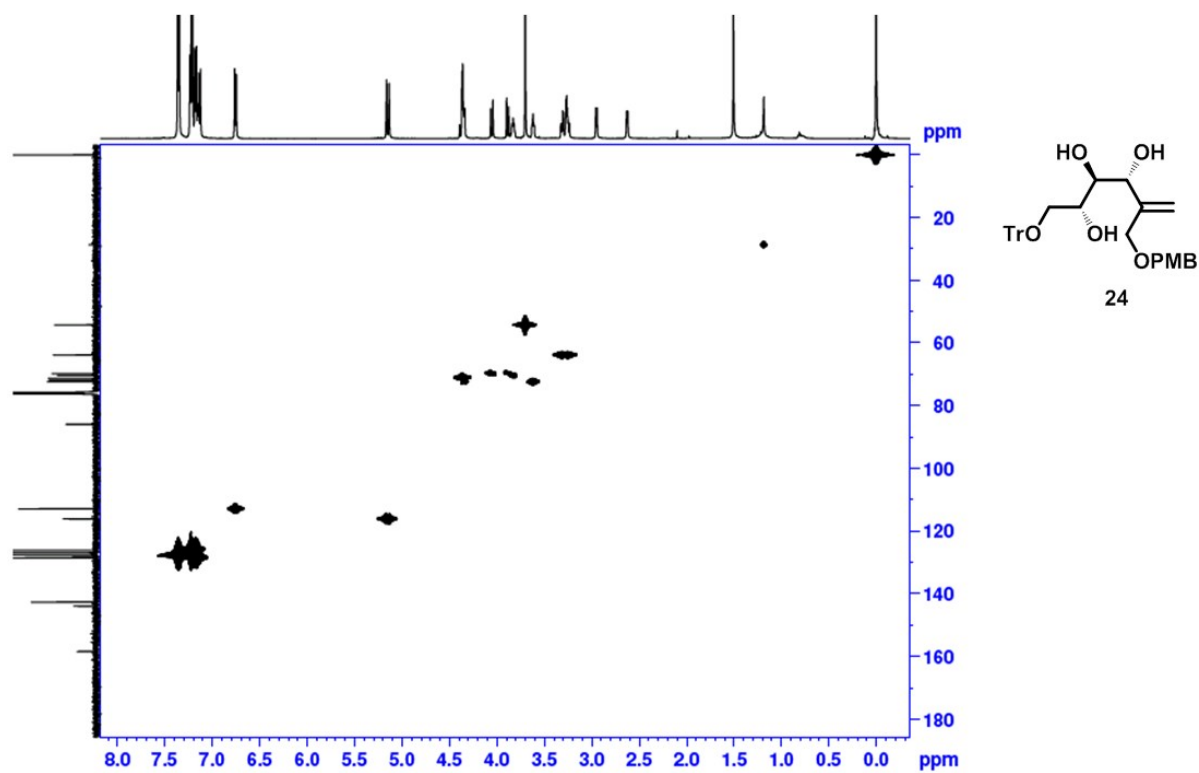

HMBC spectrum of compound **24** recorded in CDCl<sub>3</sub>

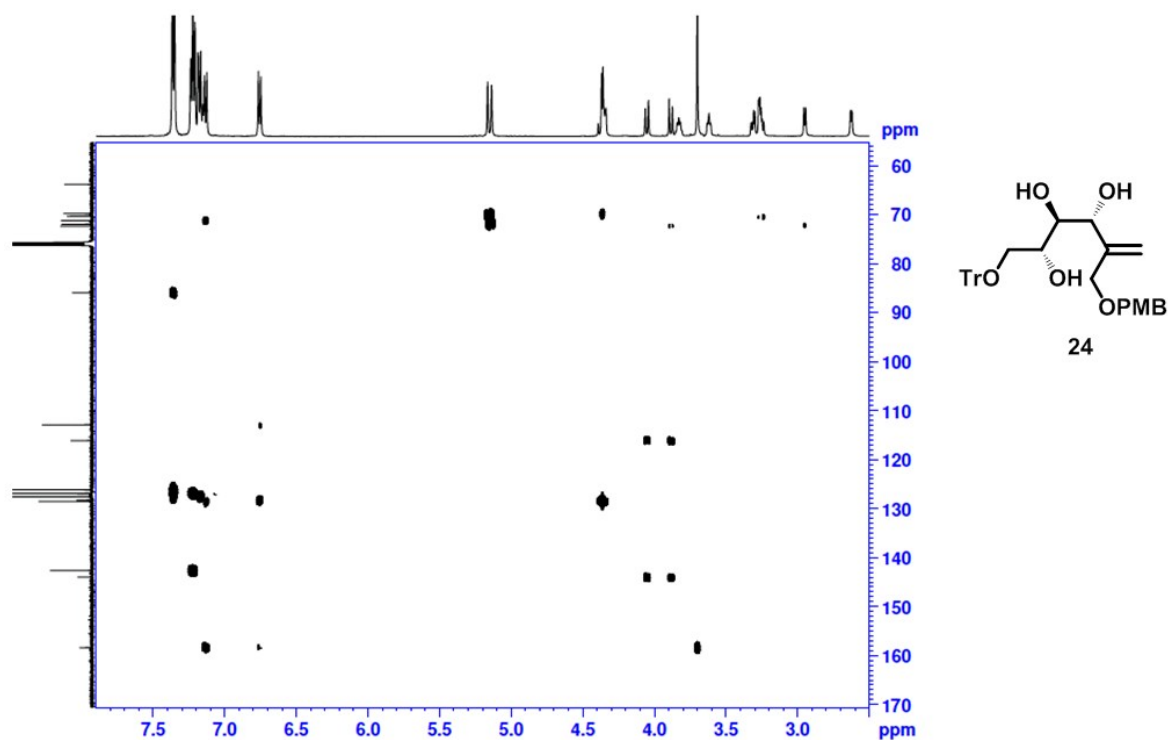

<sup>1</sup>H NMR spectrum of compound **25** recorded in CDCl<sub>3</sub>

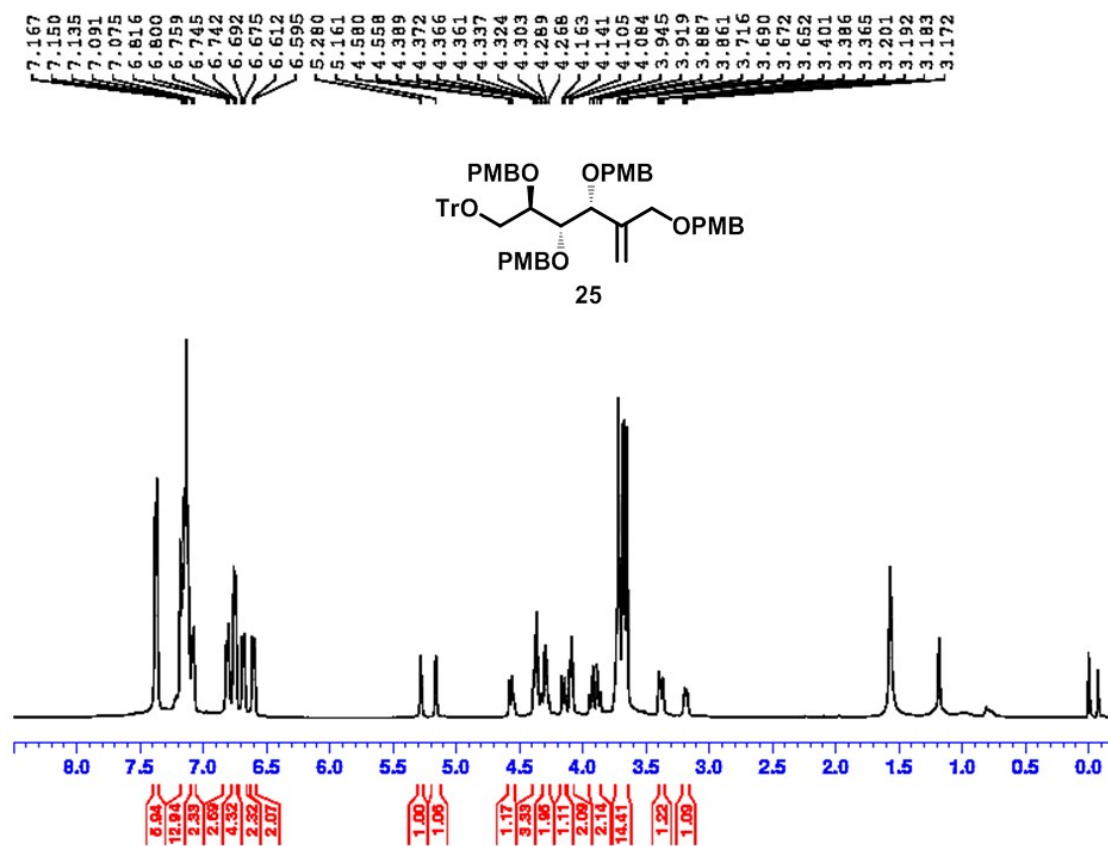

COSY spectrum of compound **25** recorded in CDCl<sub>3</sub>

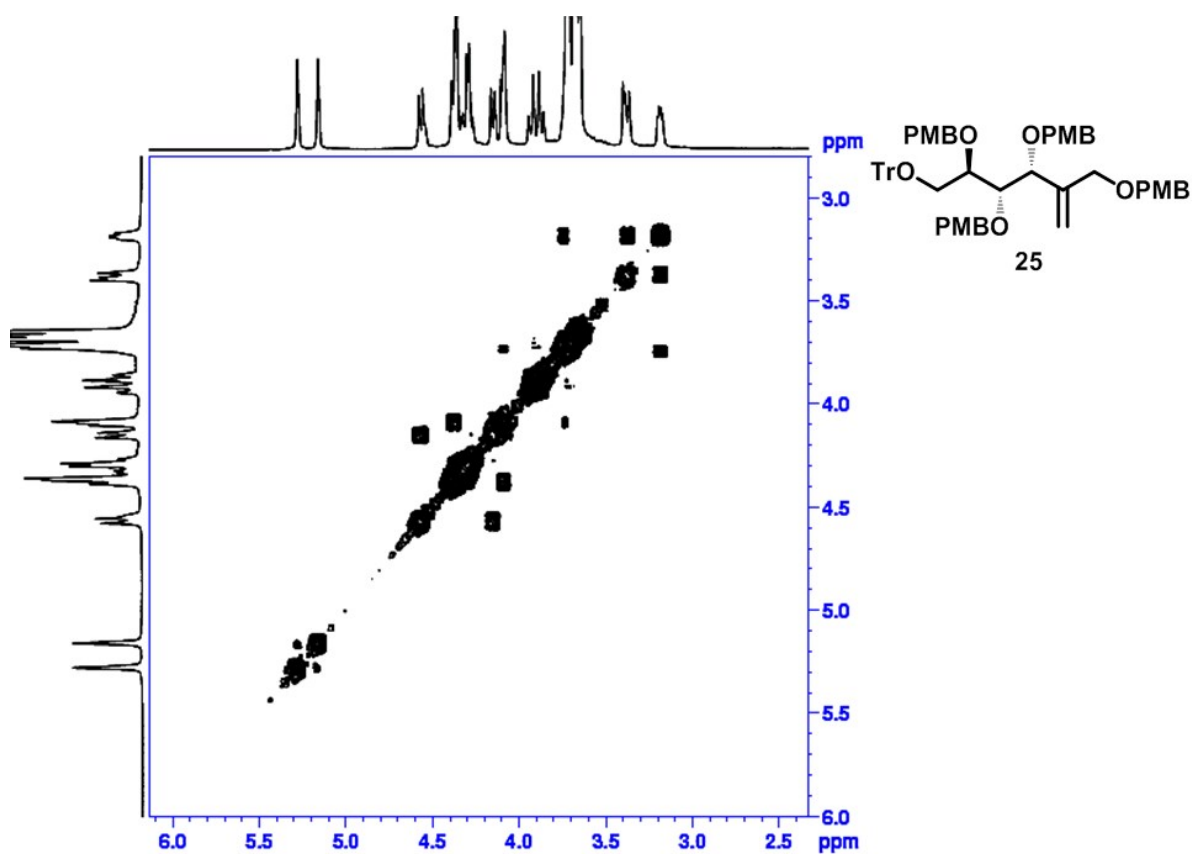

<sup>13</sup>C NMR spectrum of compound **25** recorded in CDCl<sub>3</sub>

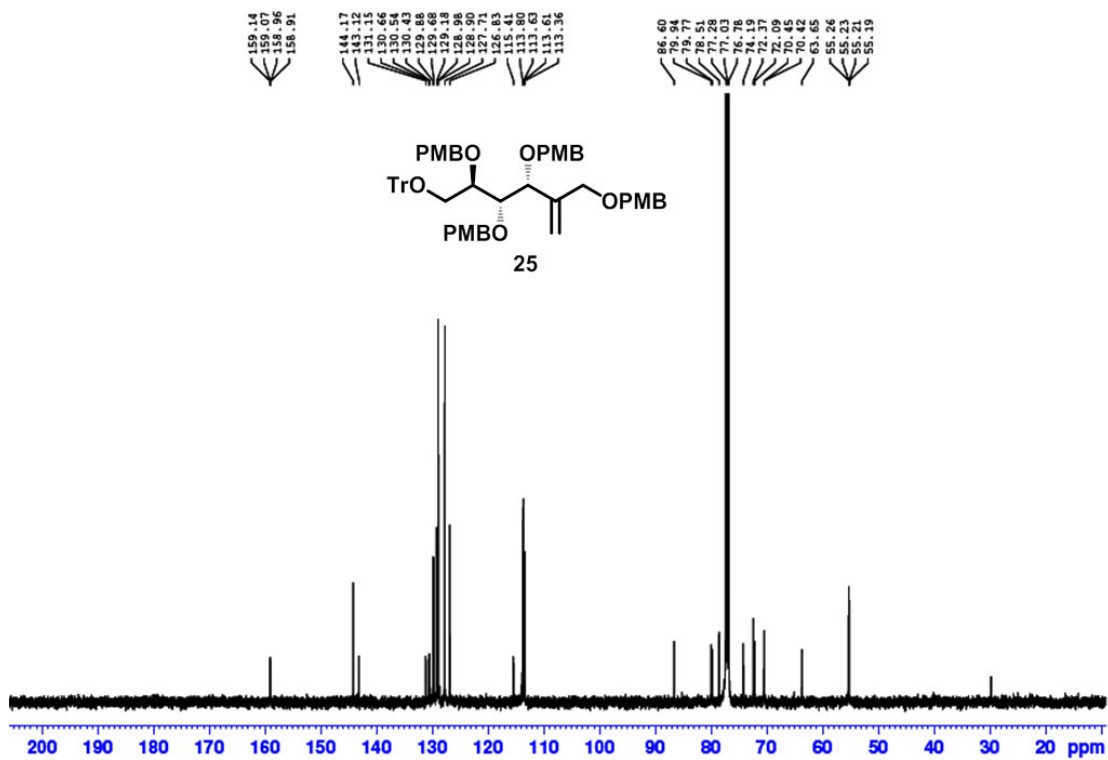

DEPT spectrum of compound **25** recorded in CDCl<sub>3</sub>

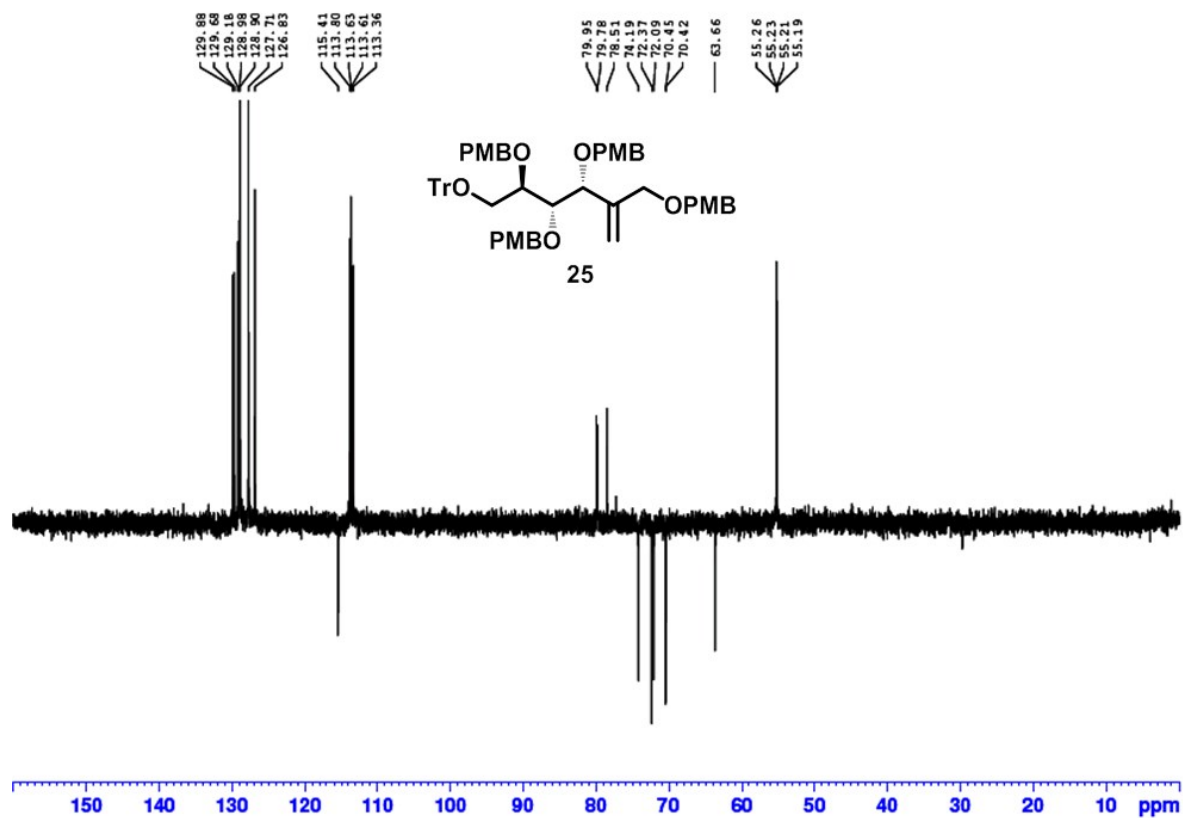

HMQC spectrum of compound **25** recorded in CDCl<sub>3</sub>

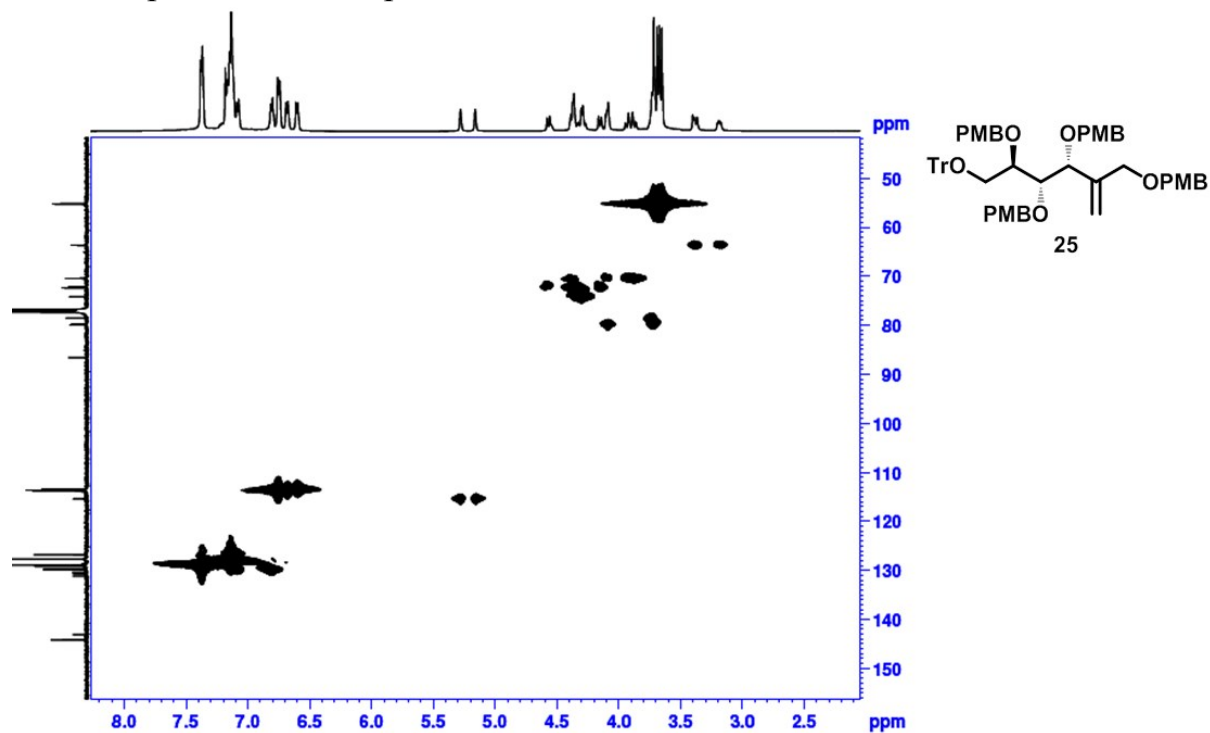

HMBC spectrum of compound **25** recorded in CDCl<sub>3</sub>

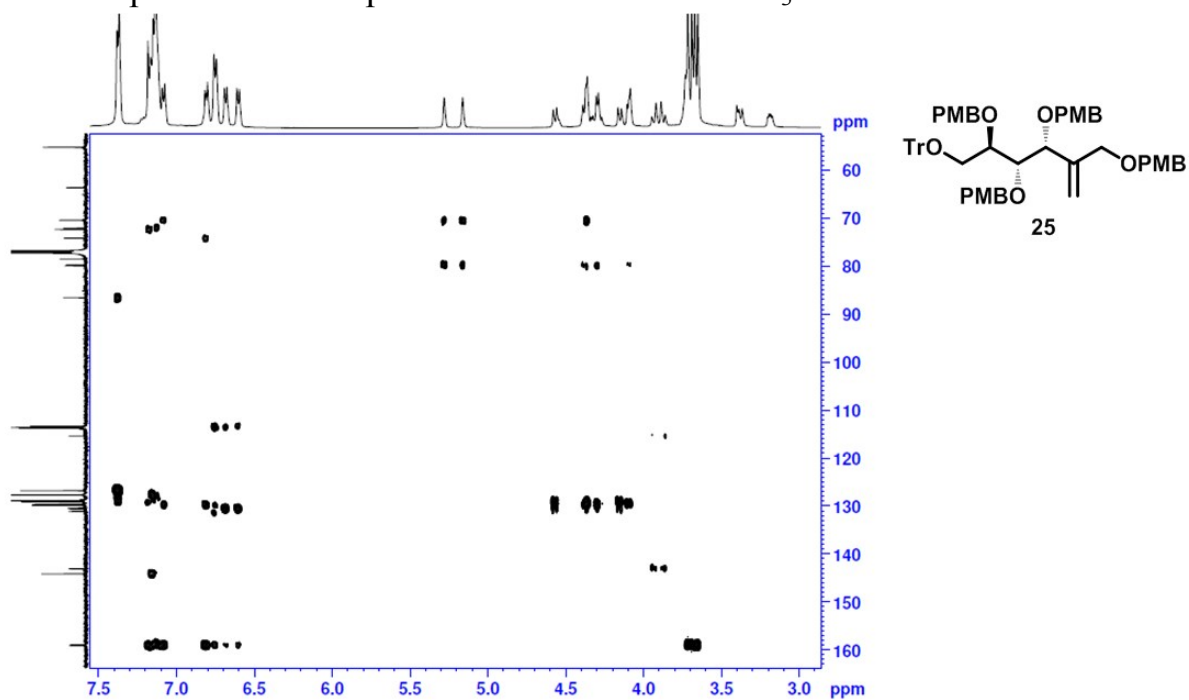

Expanded HMBC spectrum of compound **25** recorded in CDCl<sub>3</sub>

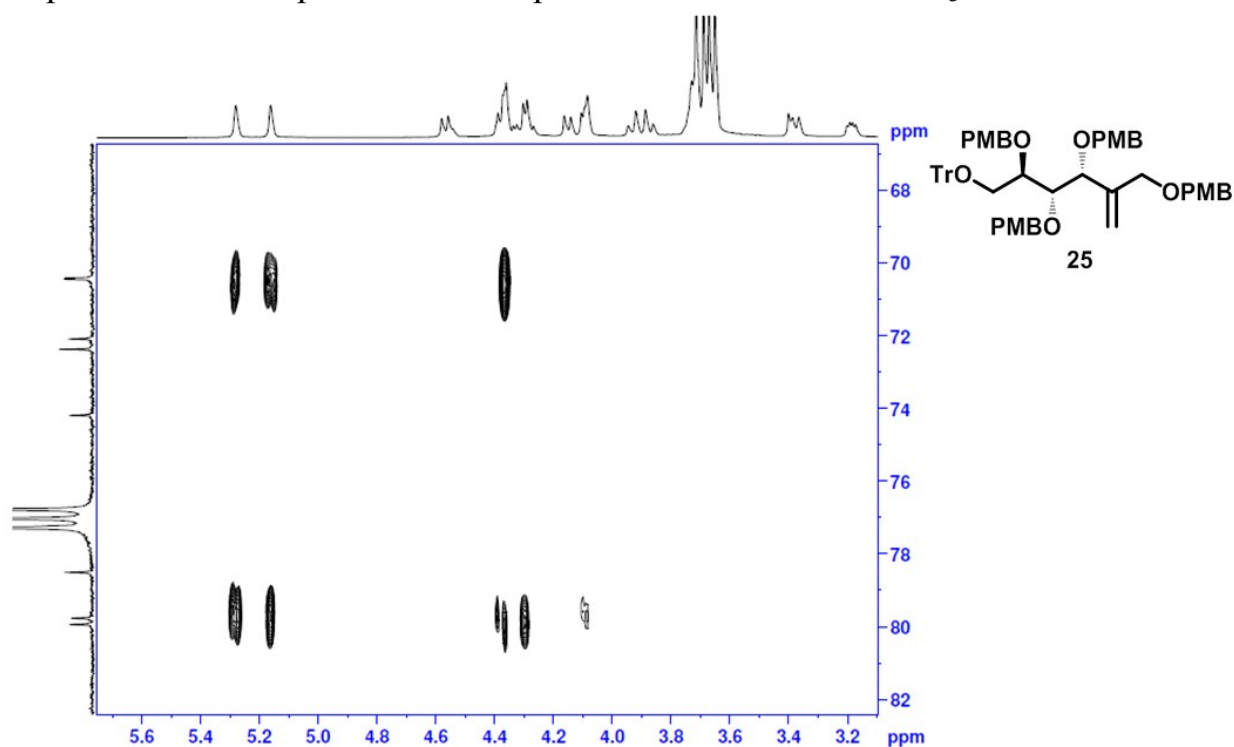



$^1\text{H}$  NMR spectrum of compound **26** recorded in  $\text{CDCl}_3$

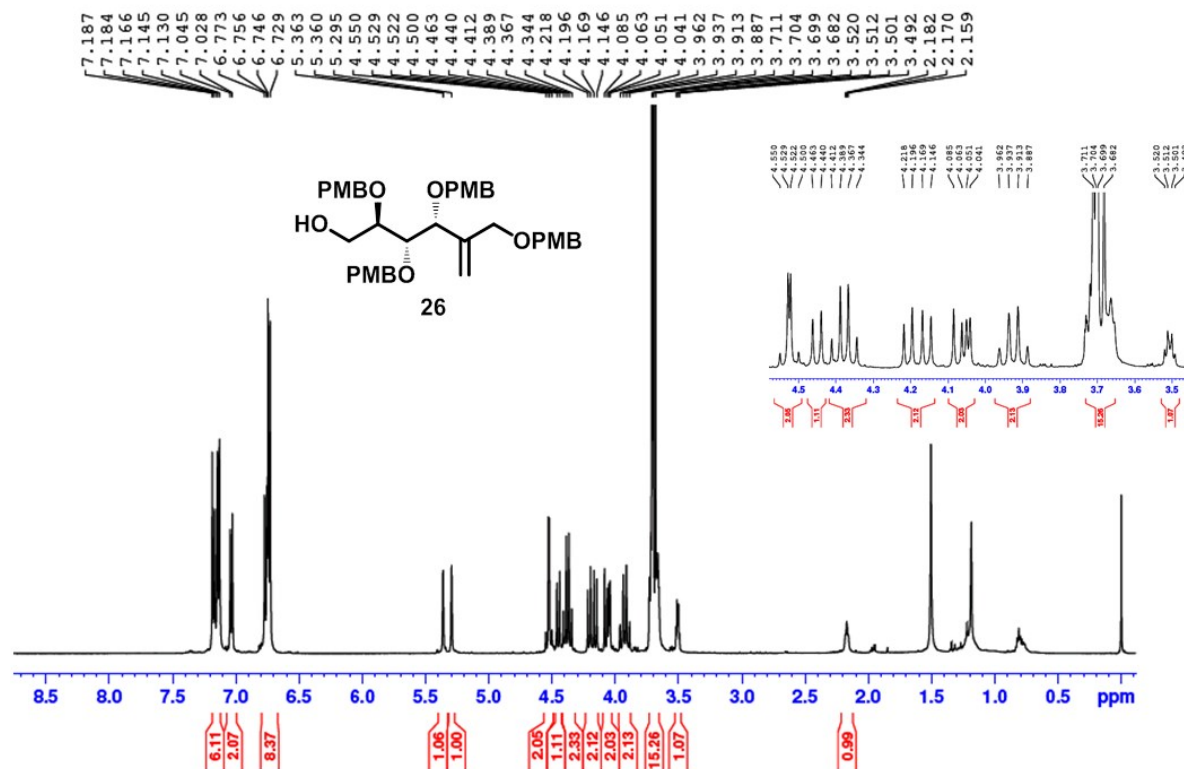

COSY spectrum of compound **26** recorded in  $\text{CDCl}_3$

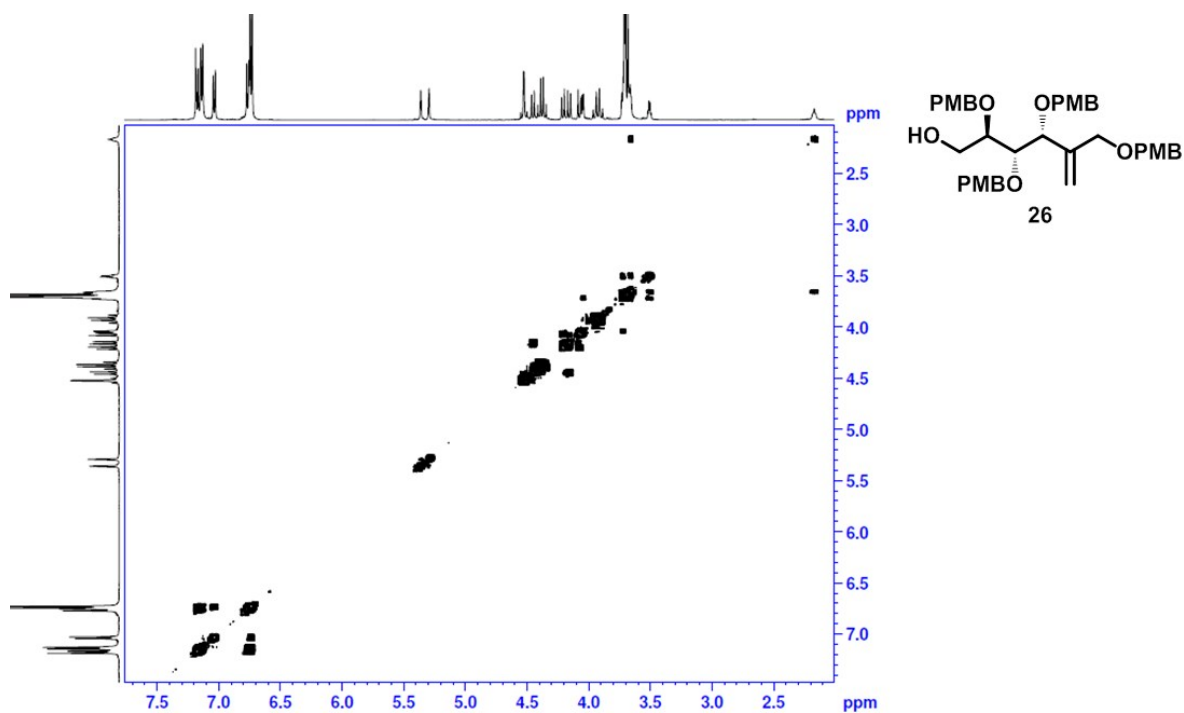

Expanded COSY spectrum of compound **26** recorded in CDCl<sub>3</sub>

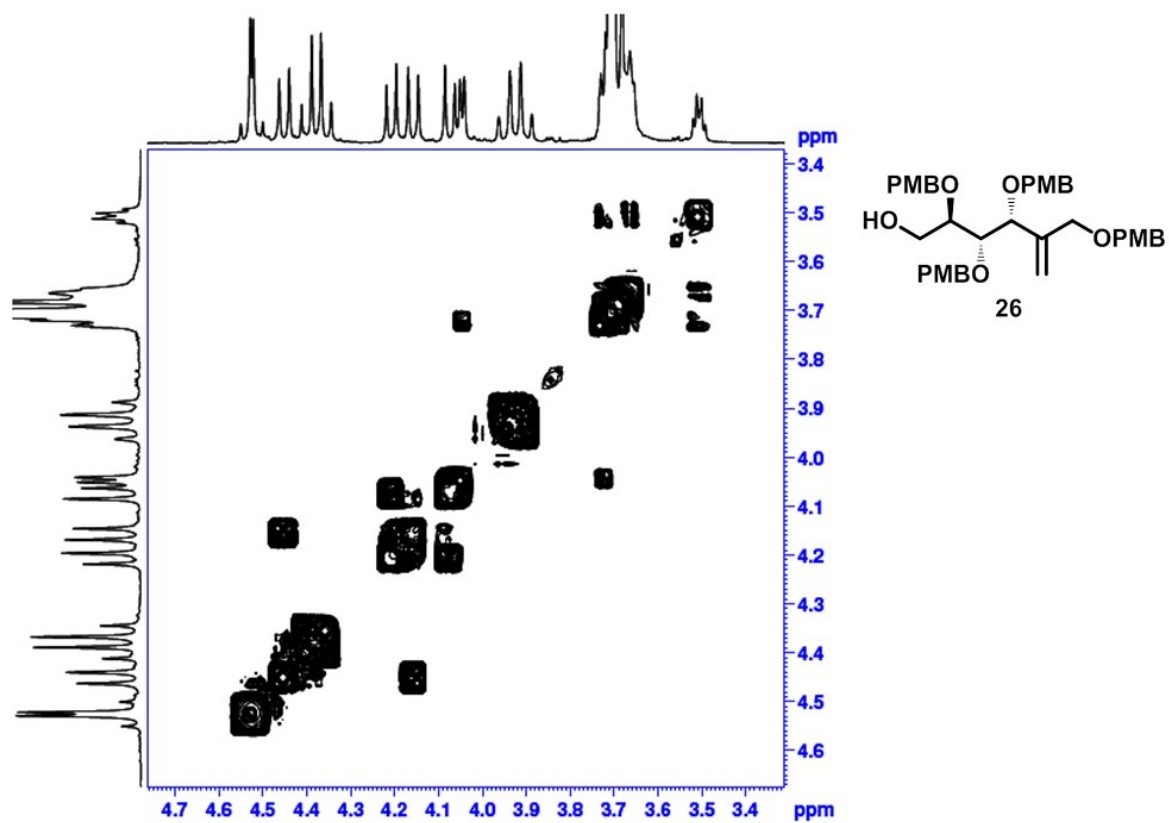

<sup>13</sup>C spectrum of compound **26** recorded in CDCl<sub>3</sub>

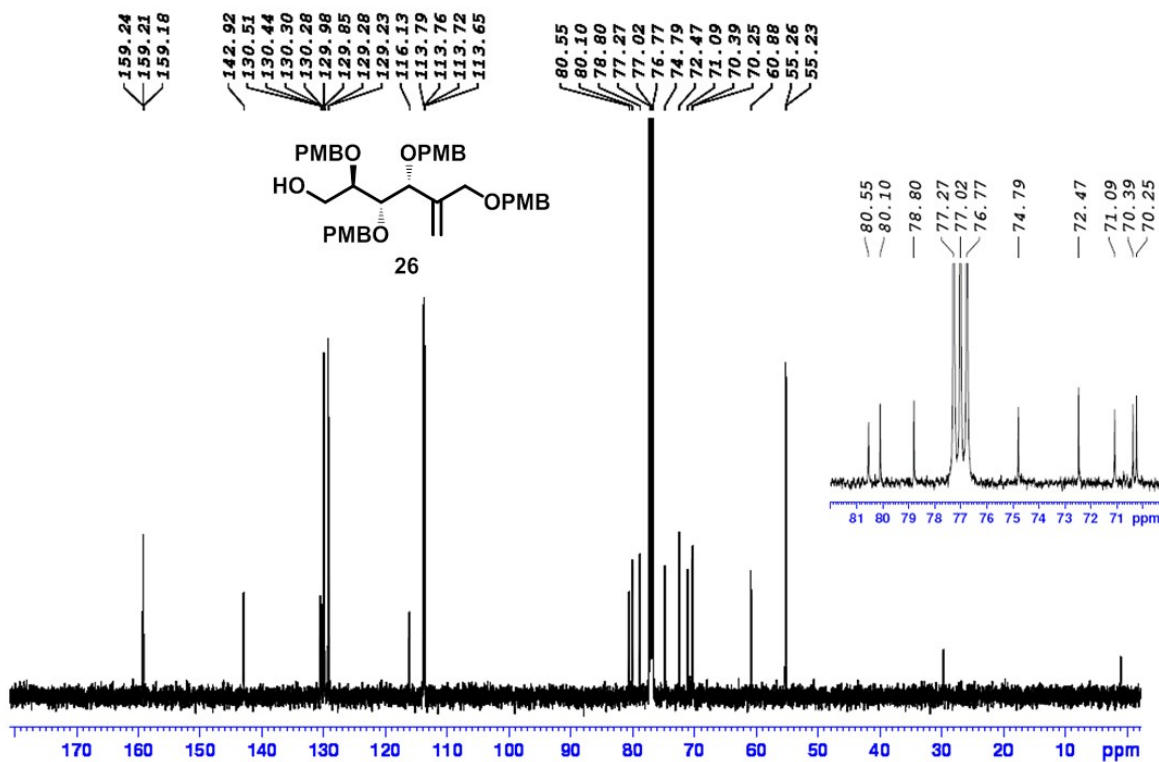

DEPT spectrum of compound **26** recorded in CDCl<sub>3</sub>

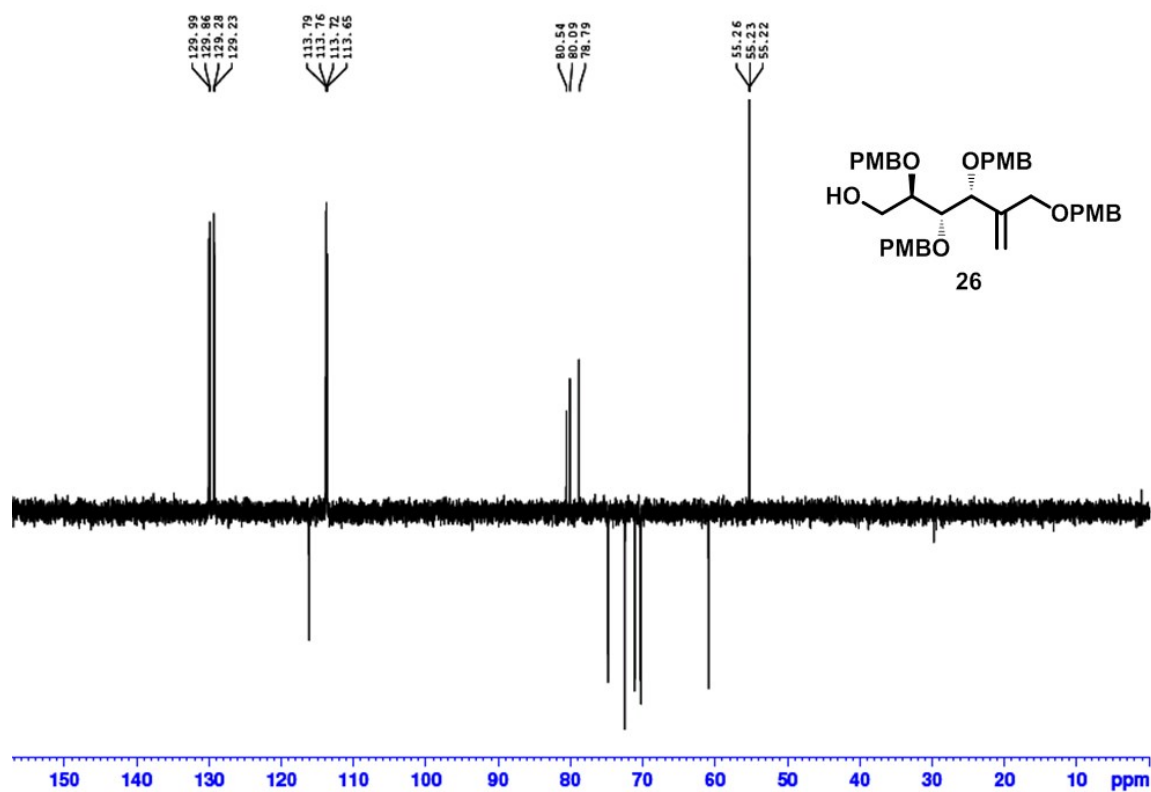

HMQC spectrum of compound **26** recorded in CDCl<sub>3</sub>

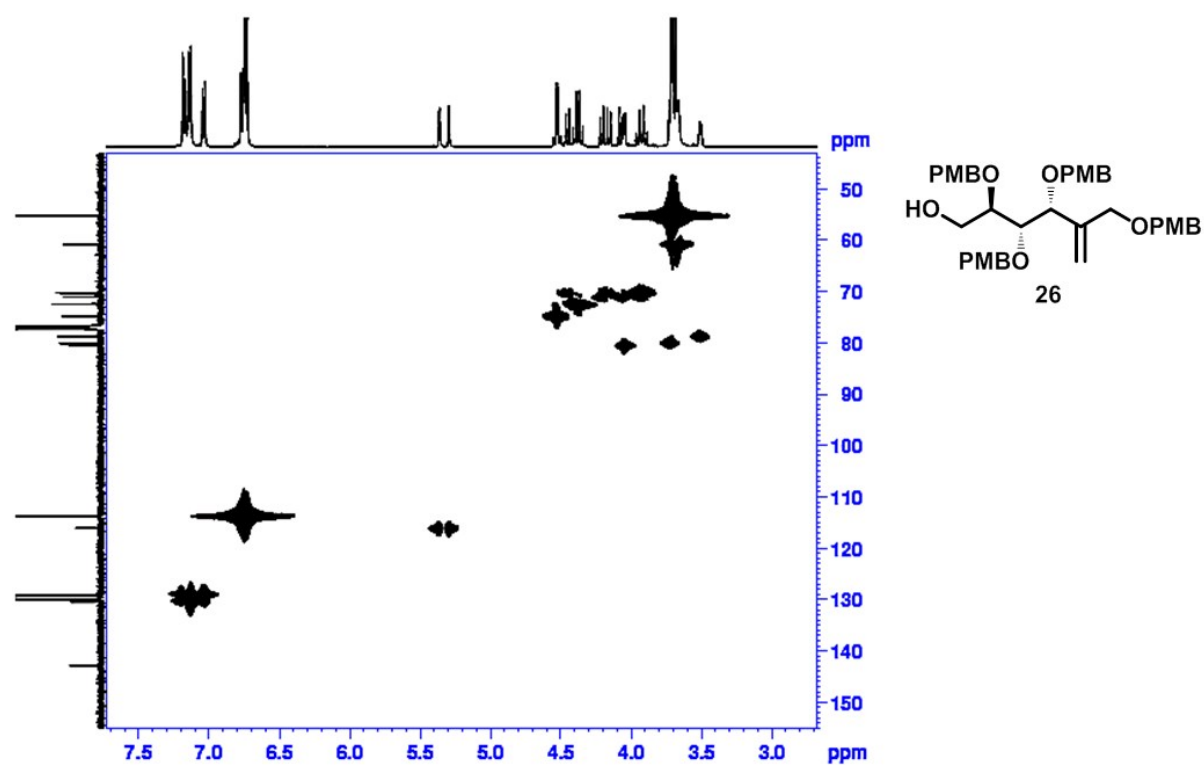

Expanded spectrum of compound **26** recorded in CDCl<sub>3</sub>

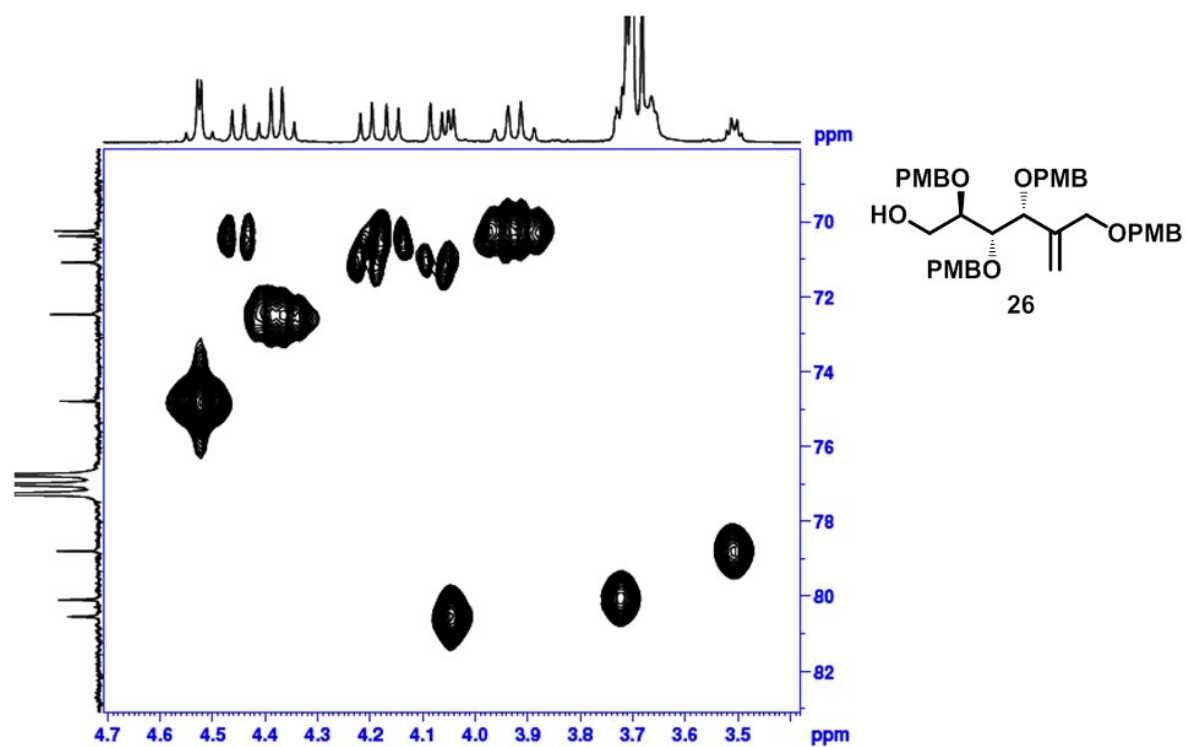

HMBC spectrum of compound **26** recorded in CDCl<sub>3</sub>

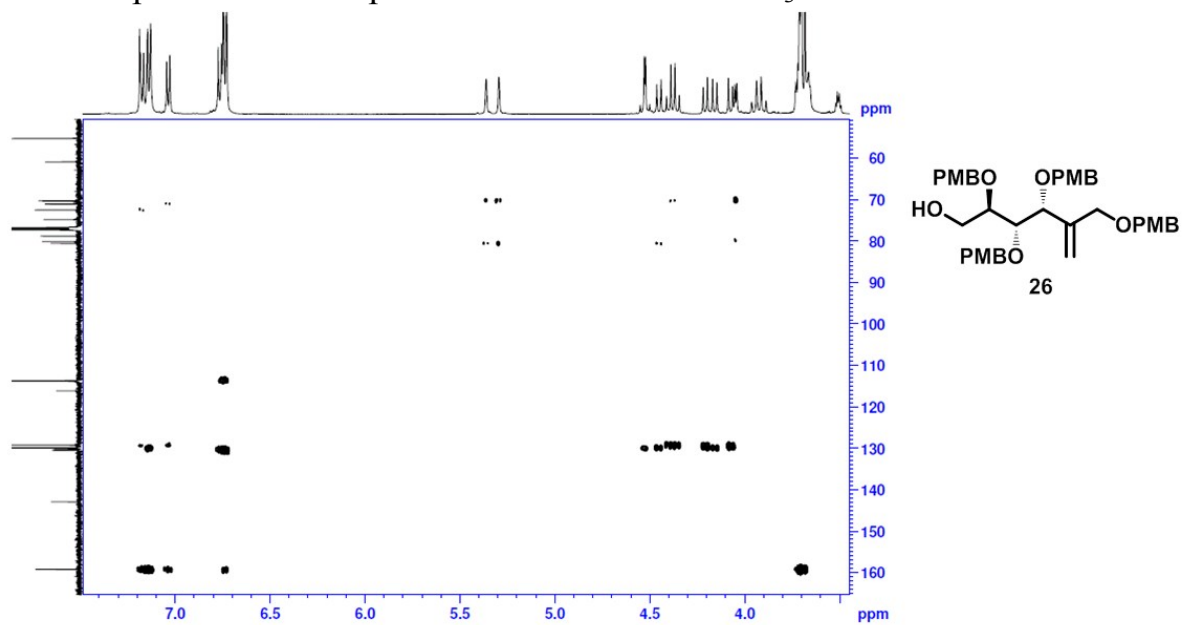

Expanded HMBC spectrum of compound **26** recorded in CDCl<sub>3</sub>

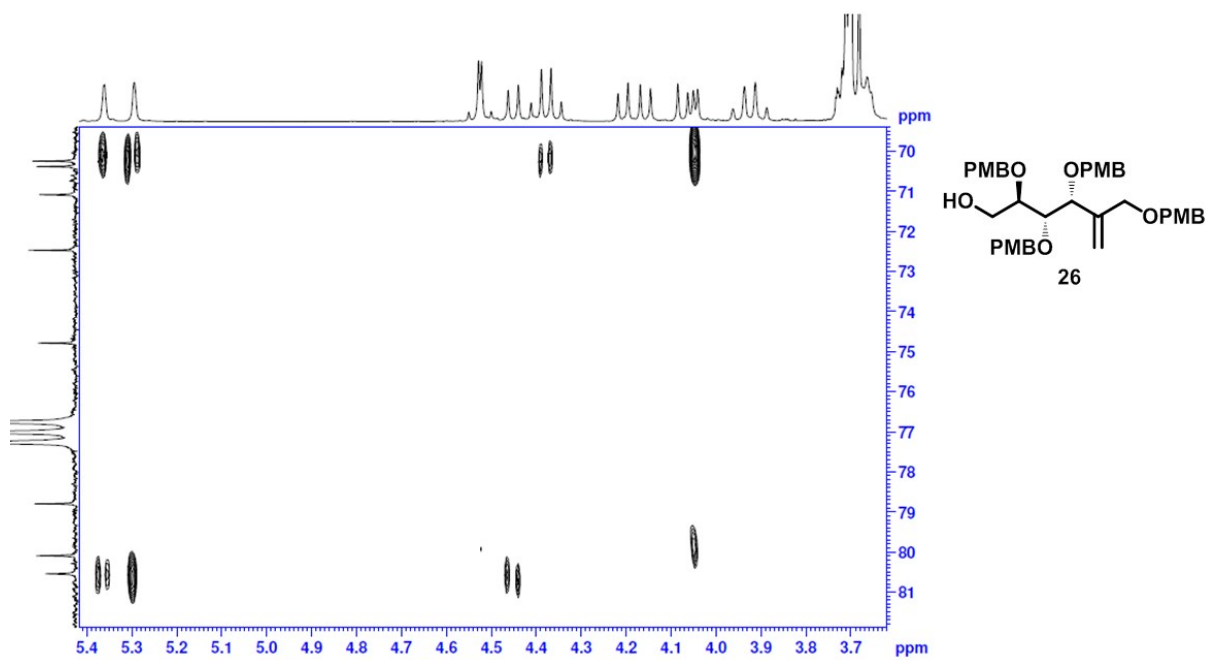

<sup>1</sup>H NMR spectrum of compound **27** recorded in CDCl<sub>3</sub>

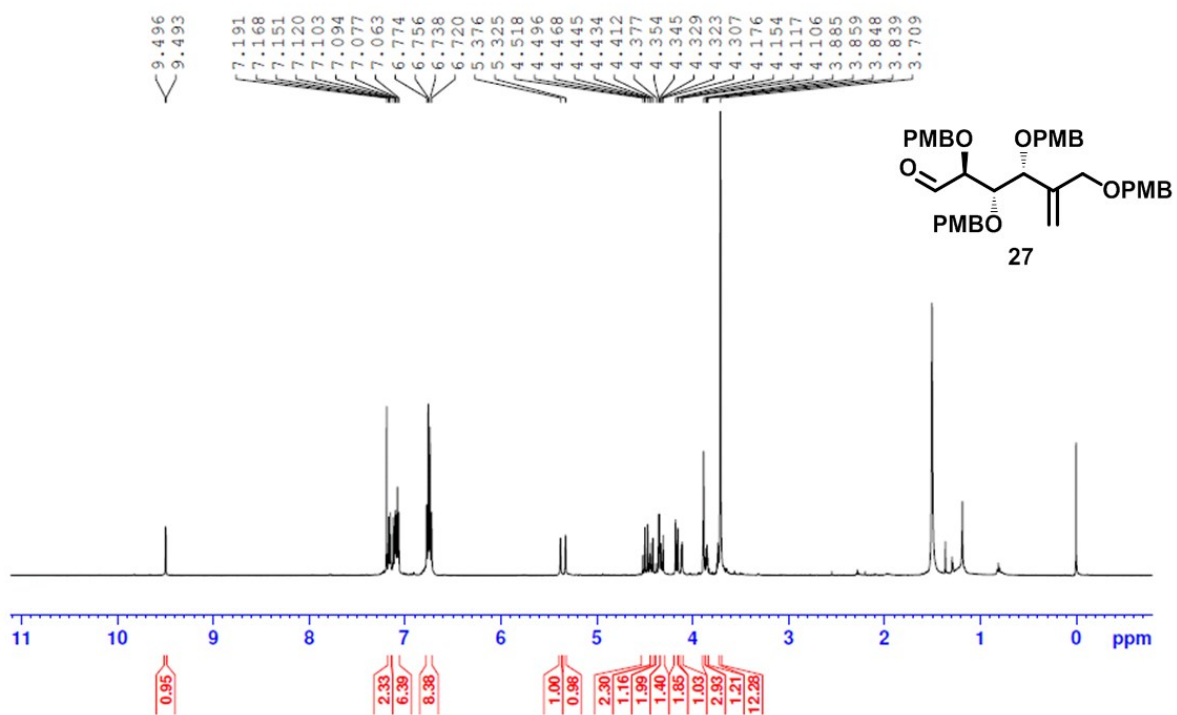

COSY spectrum of compound **27** recorded in CDCl<sub>3</sub>

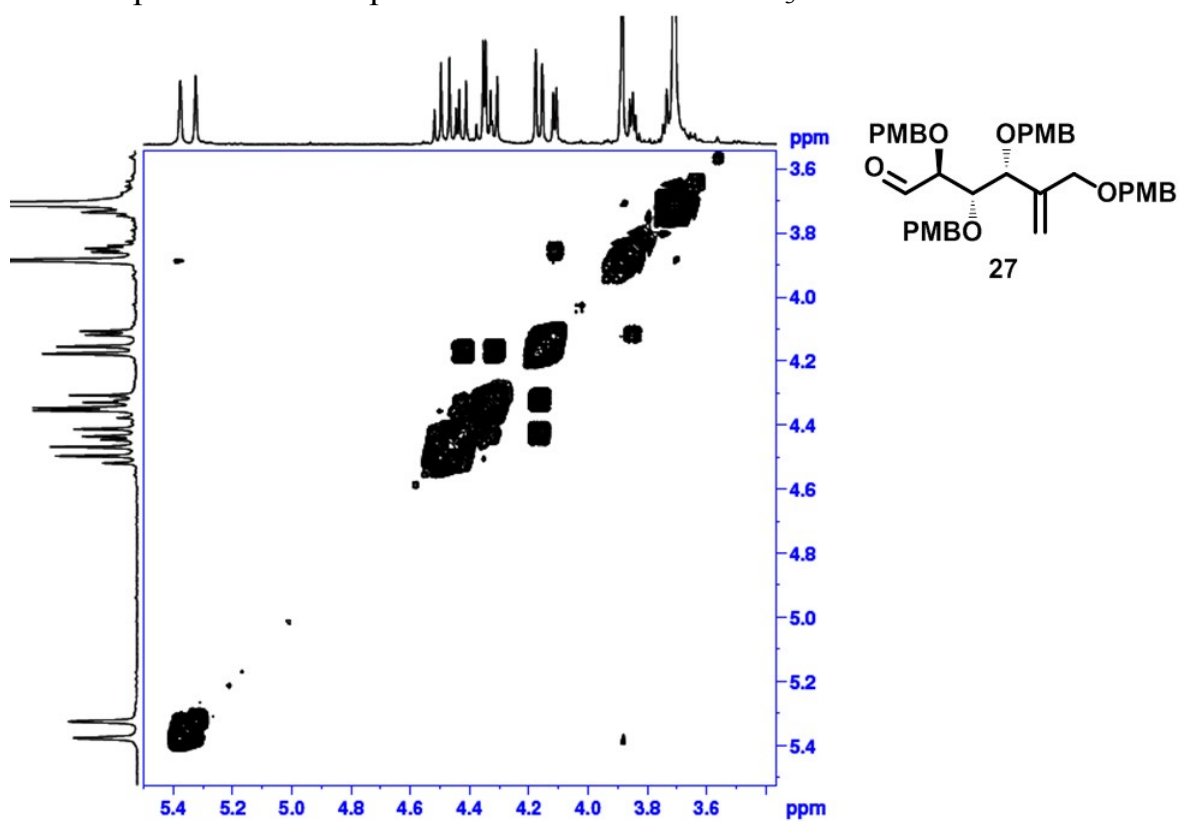

<sup>13</sup>C NMR spectrum of compound **27** recorded in CDCl<sub>3</sub>

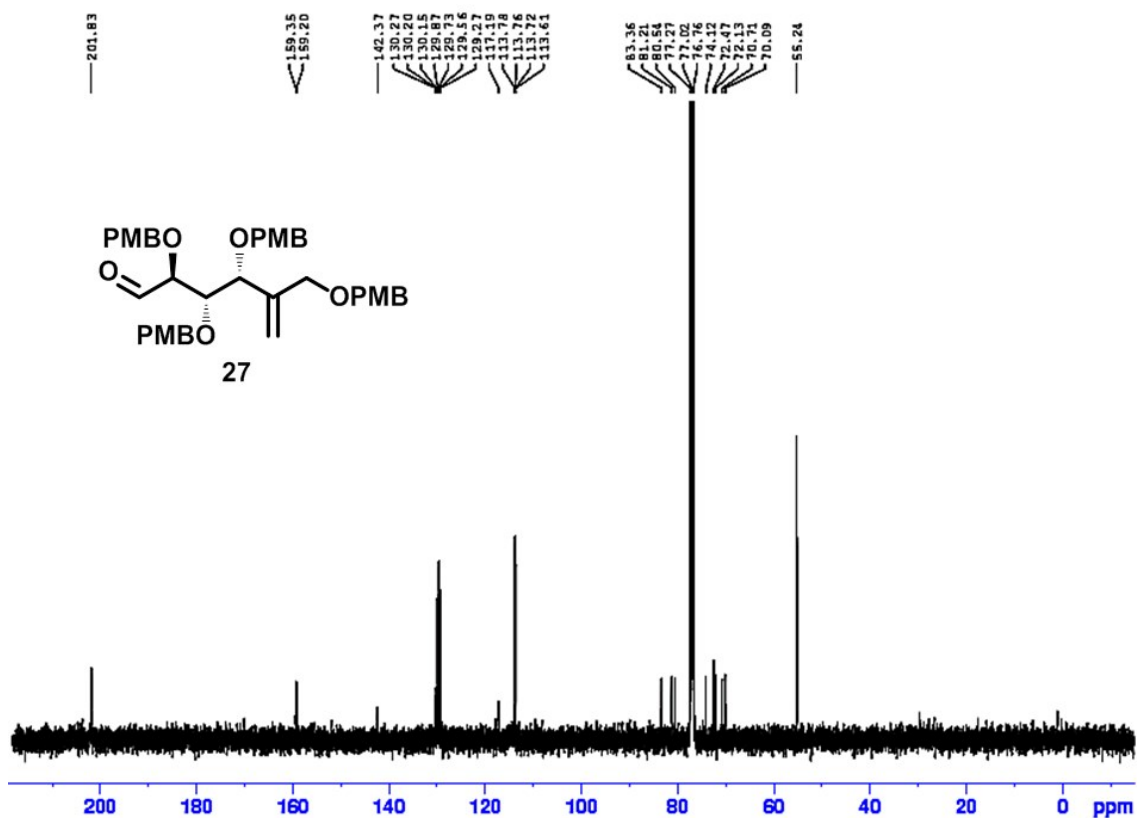

DEPT spectrum of compound **27** recorded in CDCl<sub>3</sub>

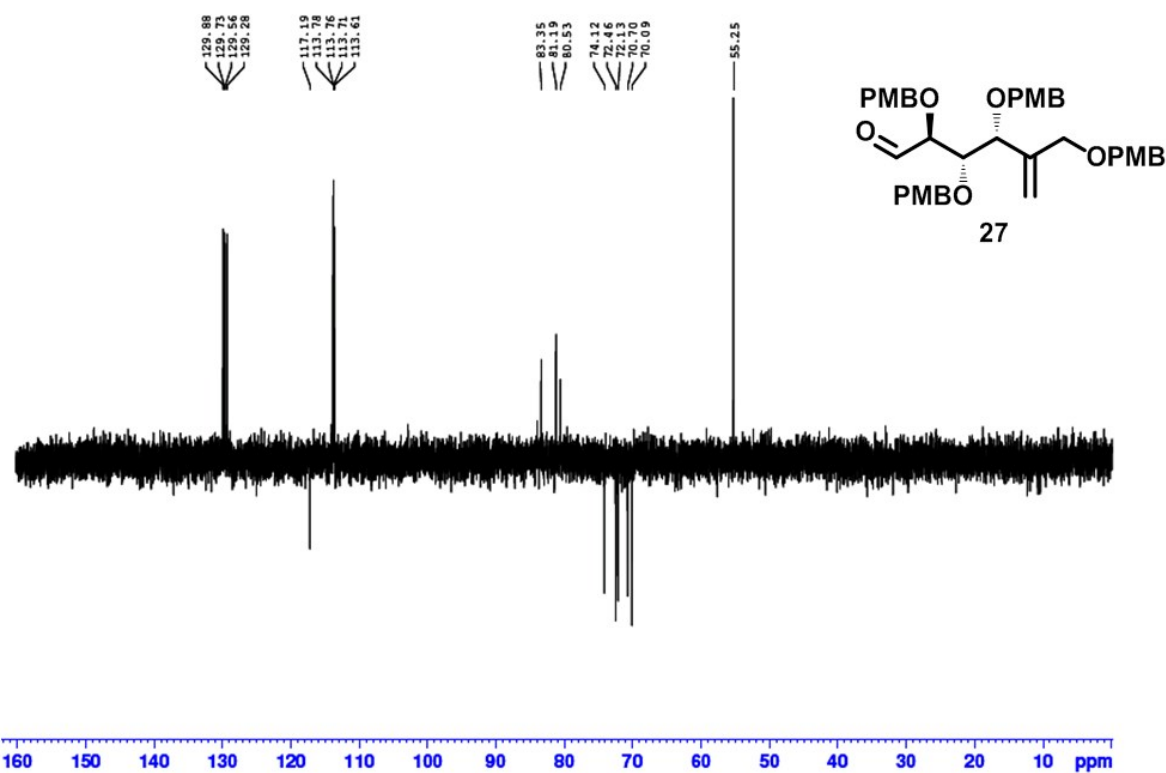

HMQC spectrum of compound **27** recorded in CDCl<sub>3</sub>

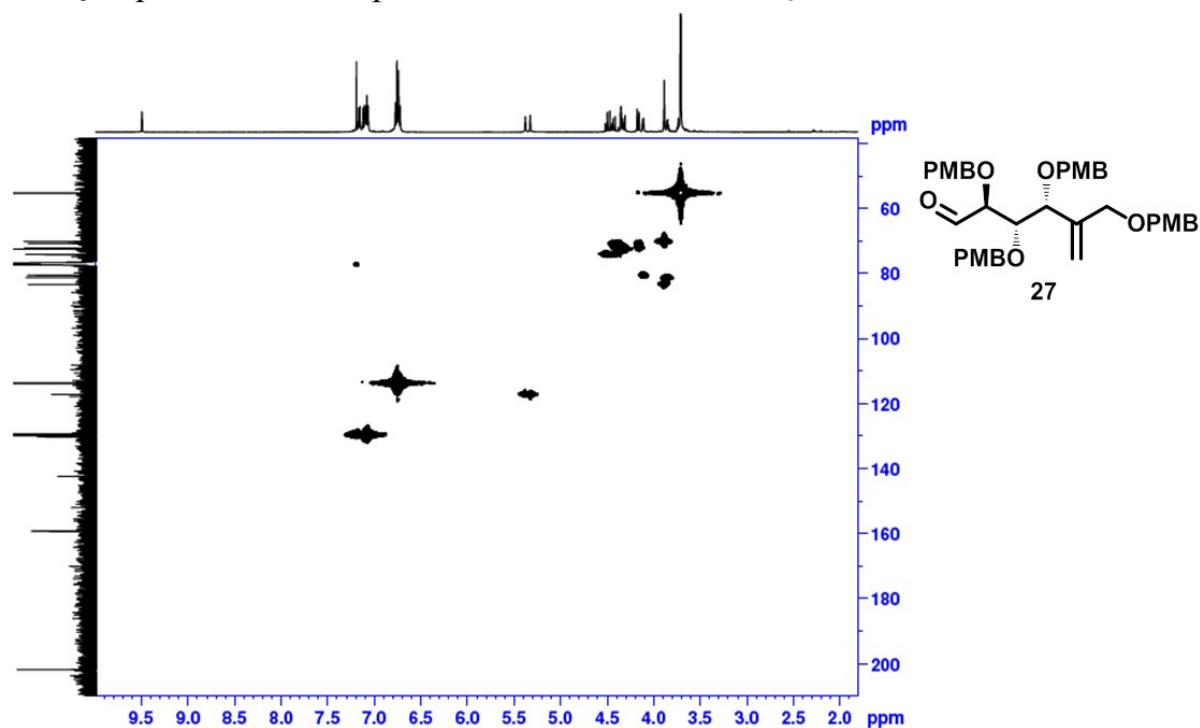

Expanded HMQC spectrum of compound **27** recorded in CDCl<sub>3</sub>

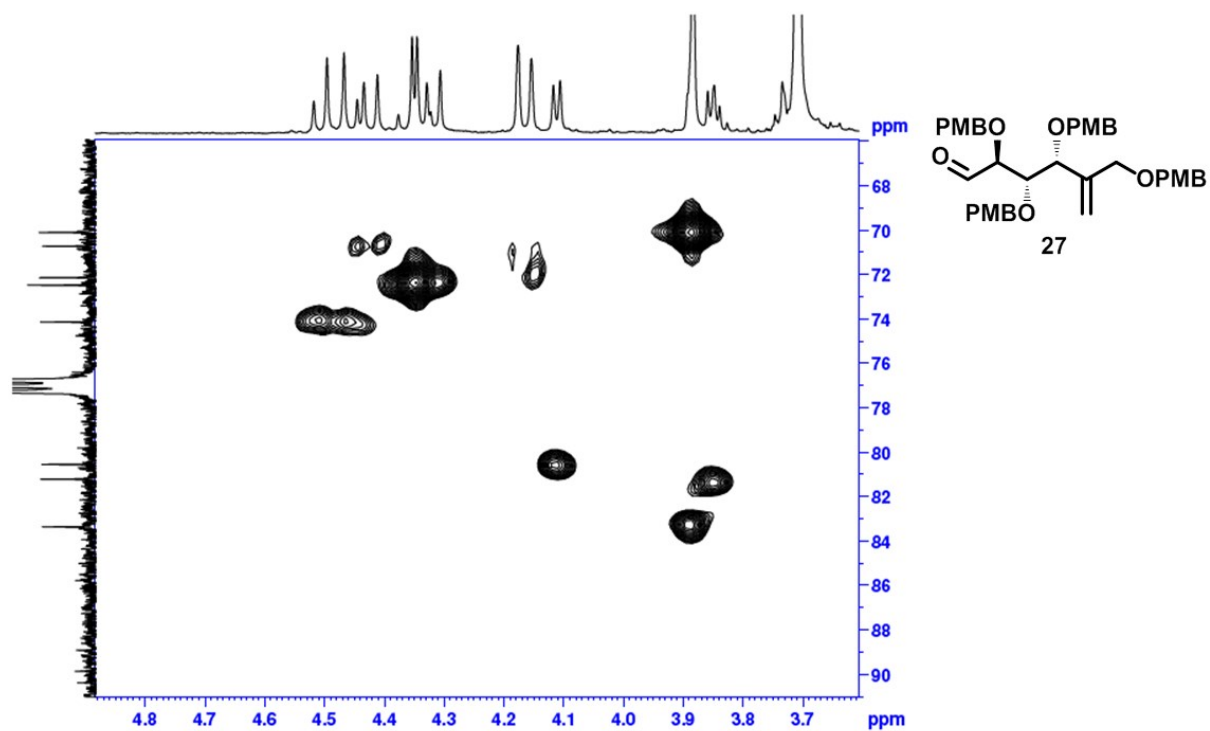

HMBC spectrum of compound **27** recorded in CDCl<sub>3</sub>

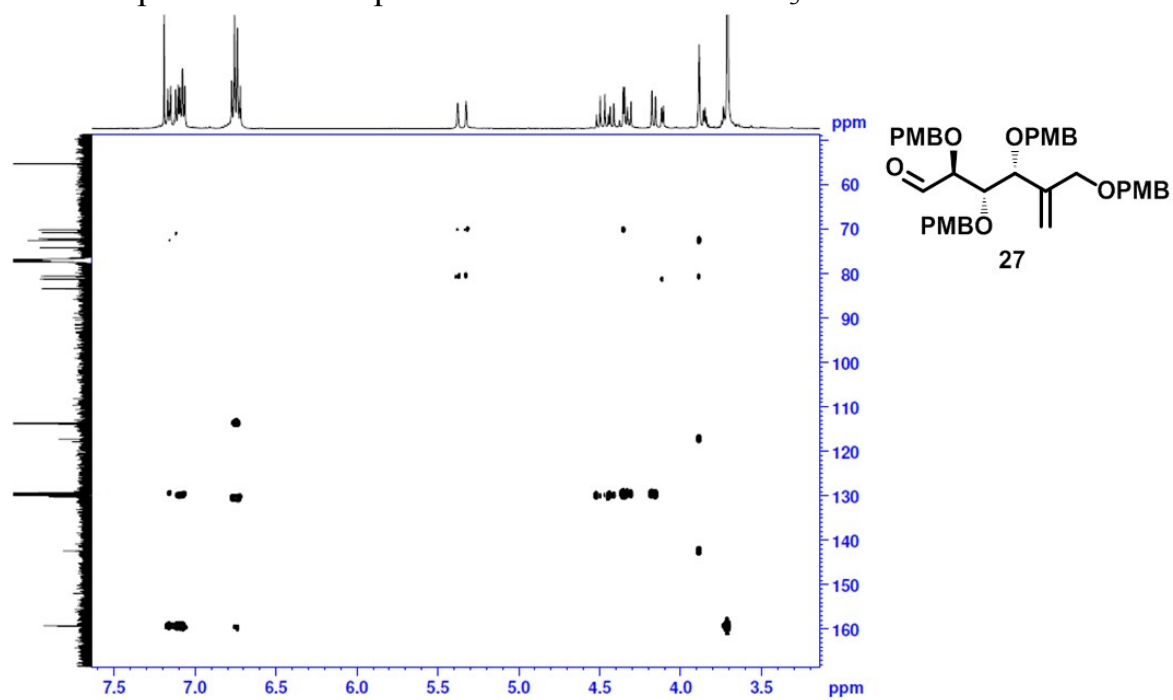



Expanded HMBC spectrum of compound **27** recorded in  $\text{CDCl}_3$

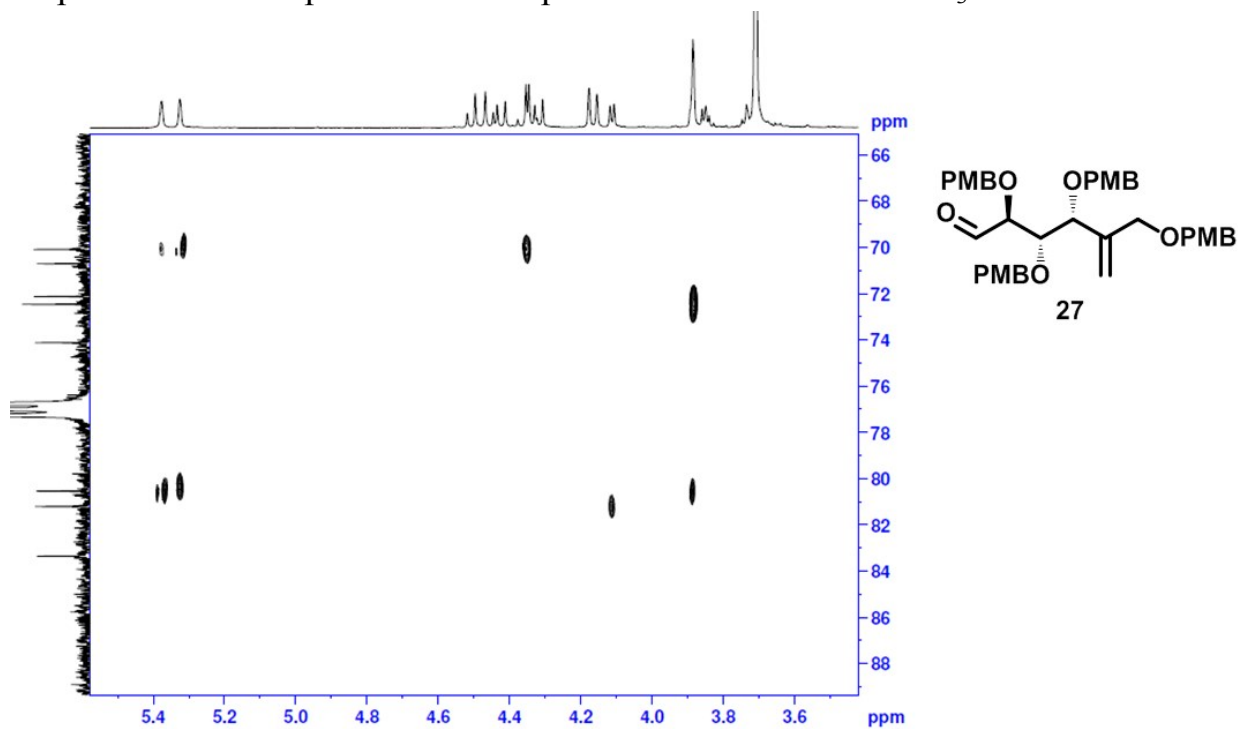

$^1\text{H}$  spectrum of the mixture of diastereomers **28** recorded in  $\text{CDCl}_3$

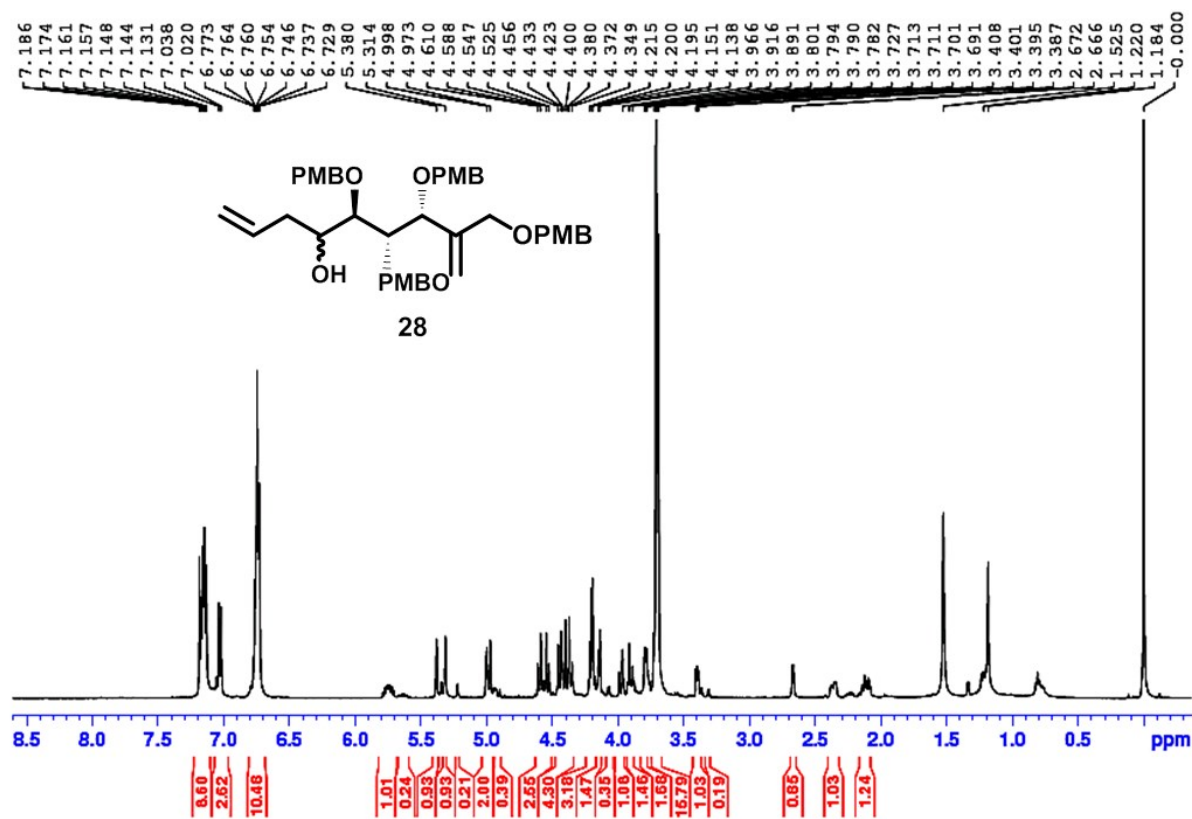

$^1\text{H}$  spectrum of the mixture of diastereomers **29** recorded in  $\text{CDCl}_3$

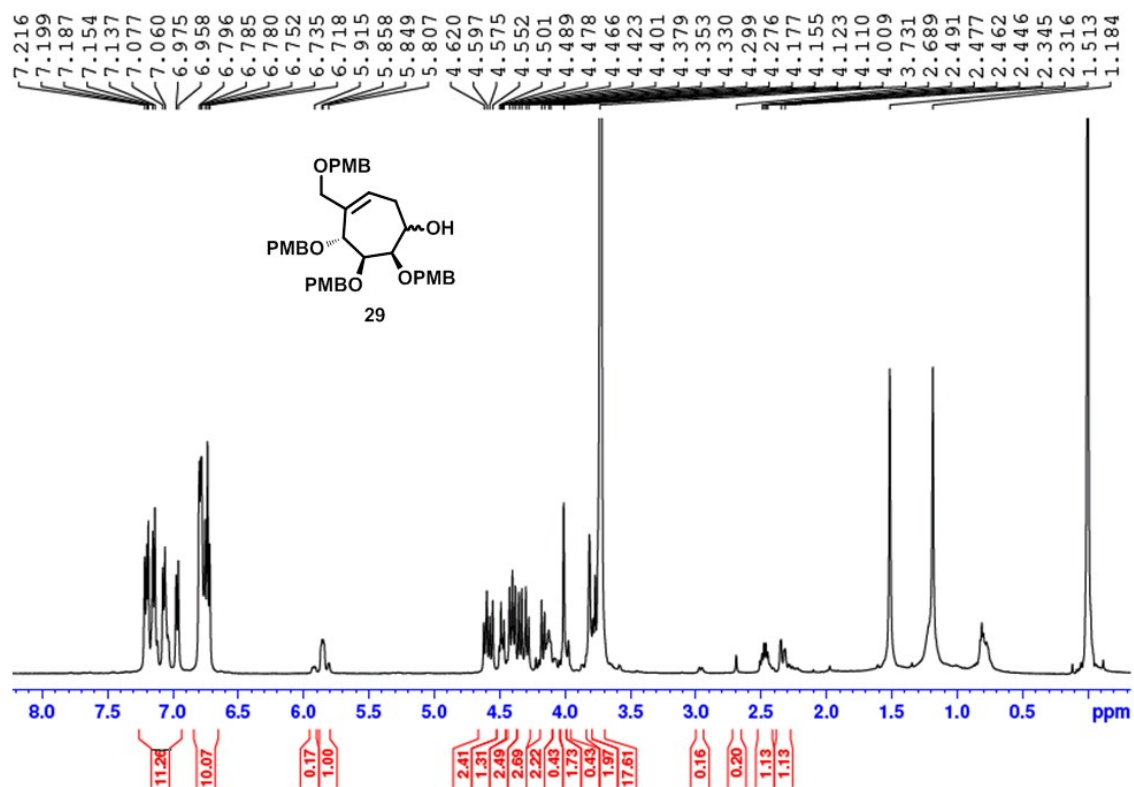

$^1\text{H}$  spectrum of cyclic ketone **30** recorded in  $\text{CDCl}_3$

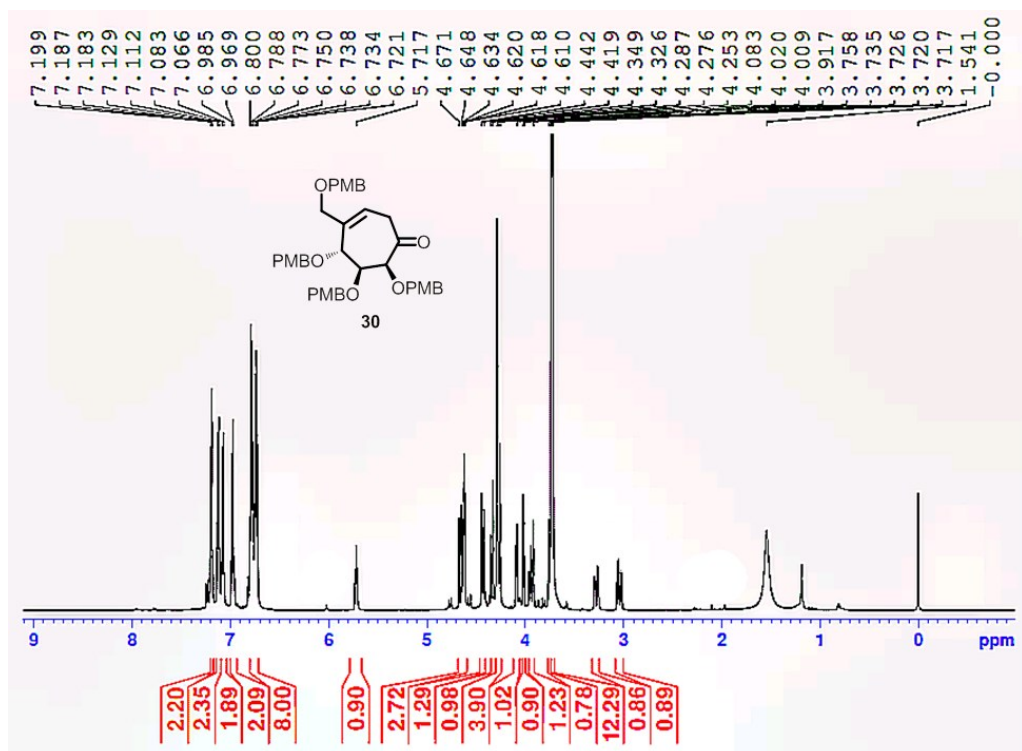

COSY spectrum of cyclic ketone **30** recorded in CDCl<sub>3</sub>

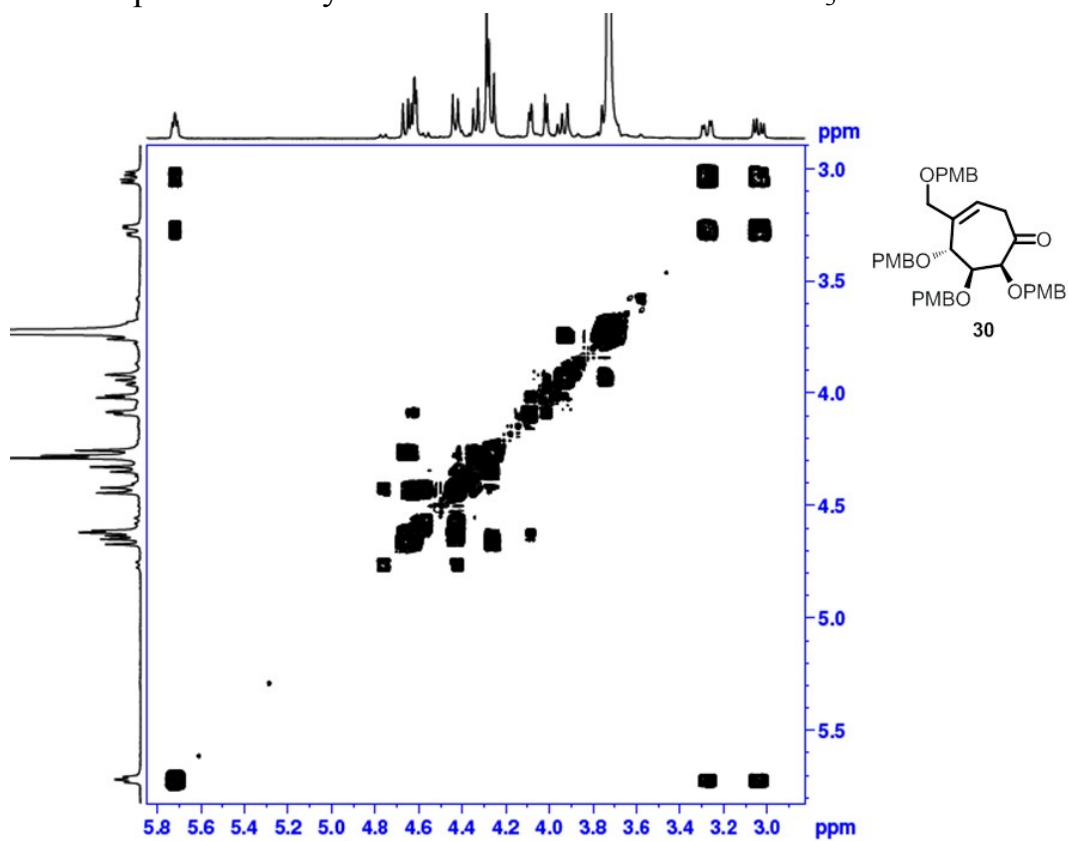

<sup>13</sup>C NMR spectrum of cyclic ketone **30** recorded in CDCl<sub>3</sub>

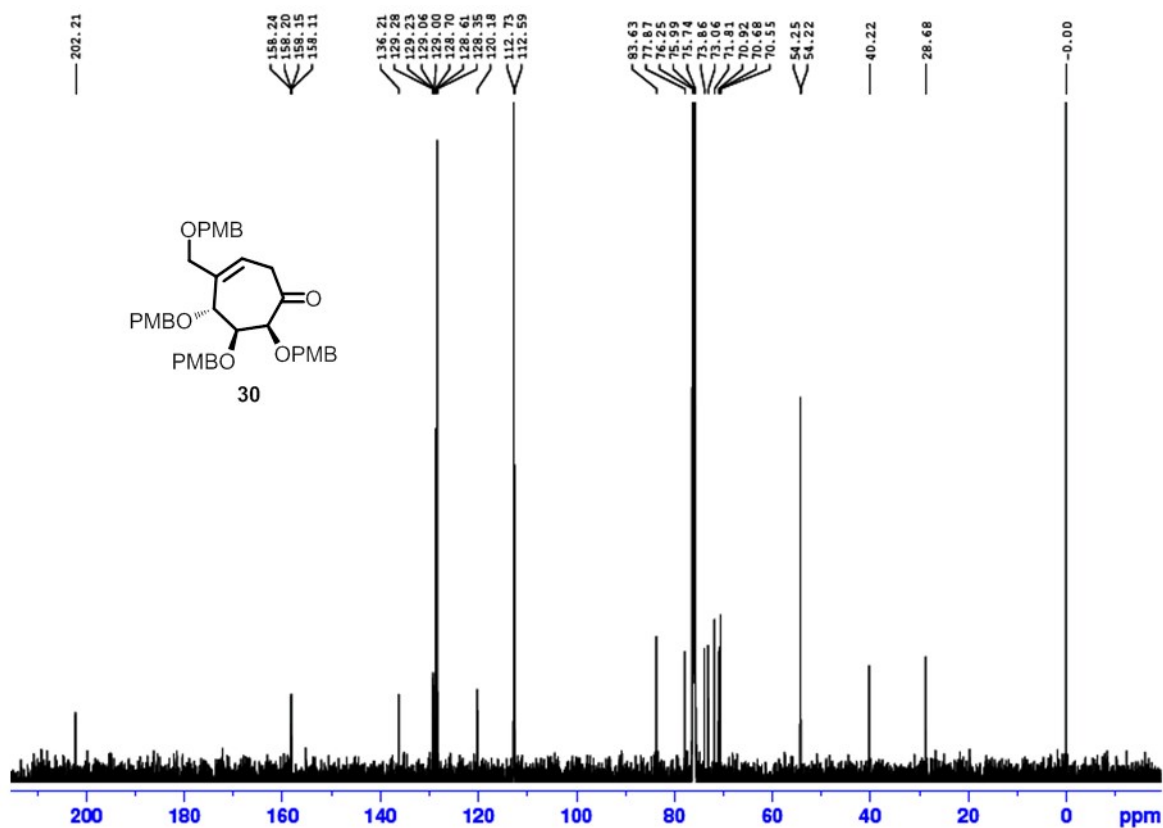

DEPT spectrum of cyclic ketone **30** recorded in CDCl<sub>3</sub>

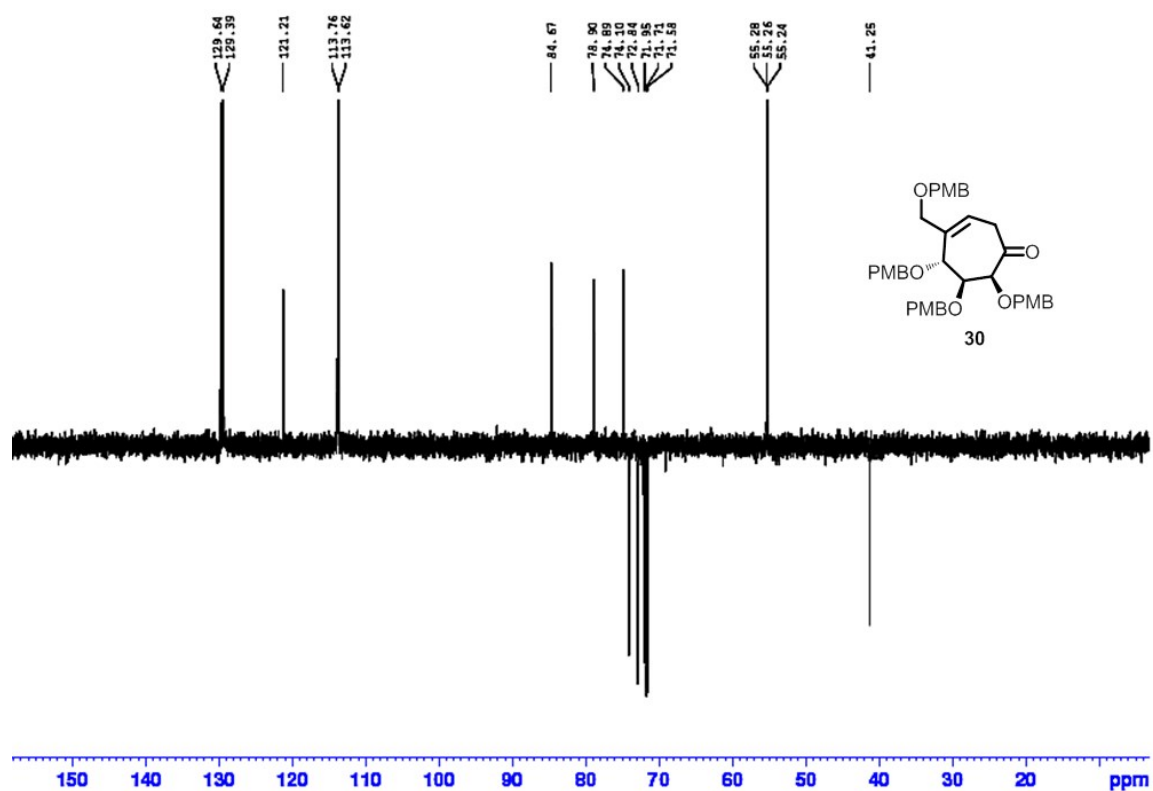

HMQC spectrum of cyclic ketone **30** recorded in CDCl<sub>3</sub>

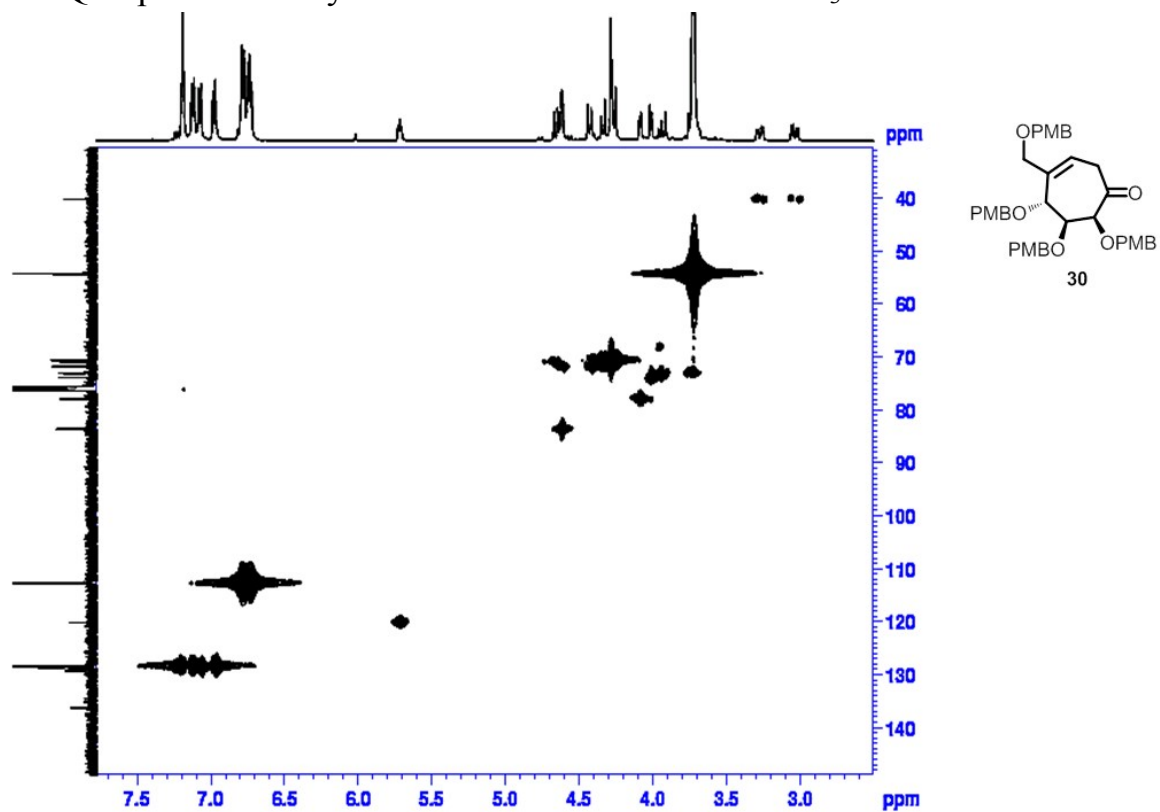

Expanded HMQC spectrum of cyclic ketone **30** recorded in CDCl<sub>3</sub>

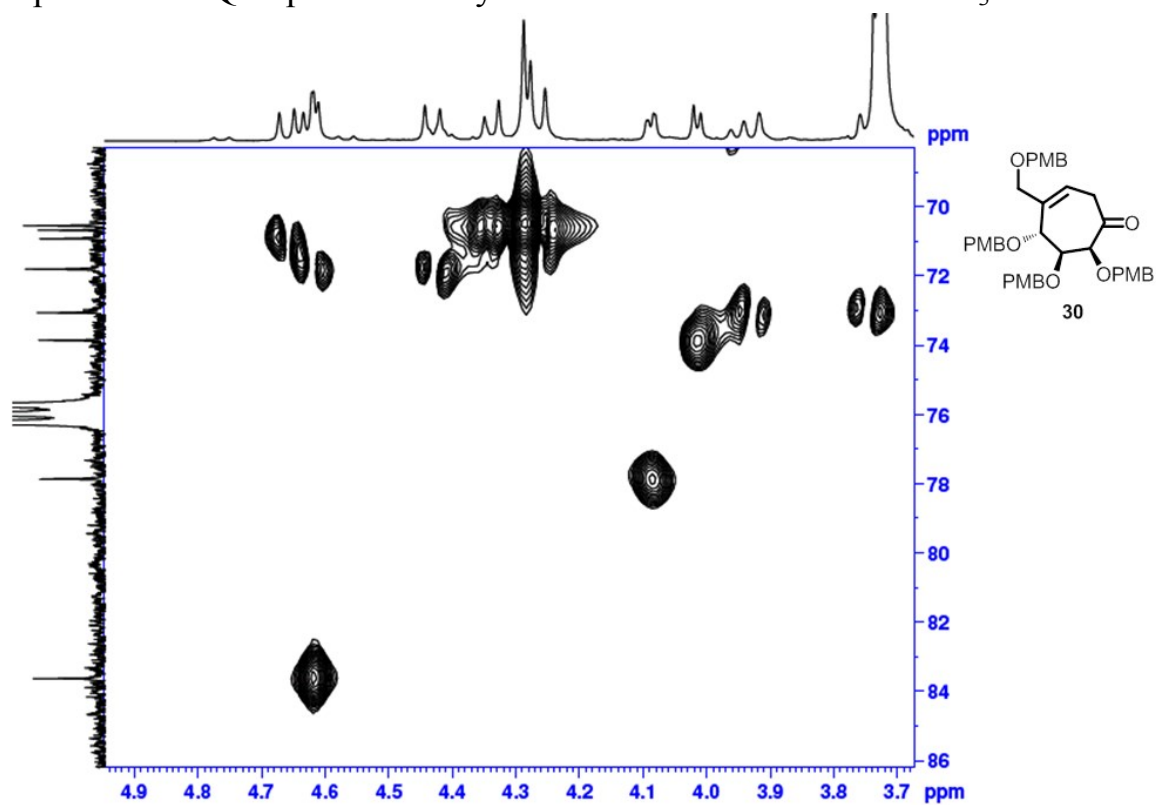

<sup>1</sup>H NMR spectrum of compound **4** recorded in CD<sub>3</sub>OD

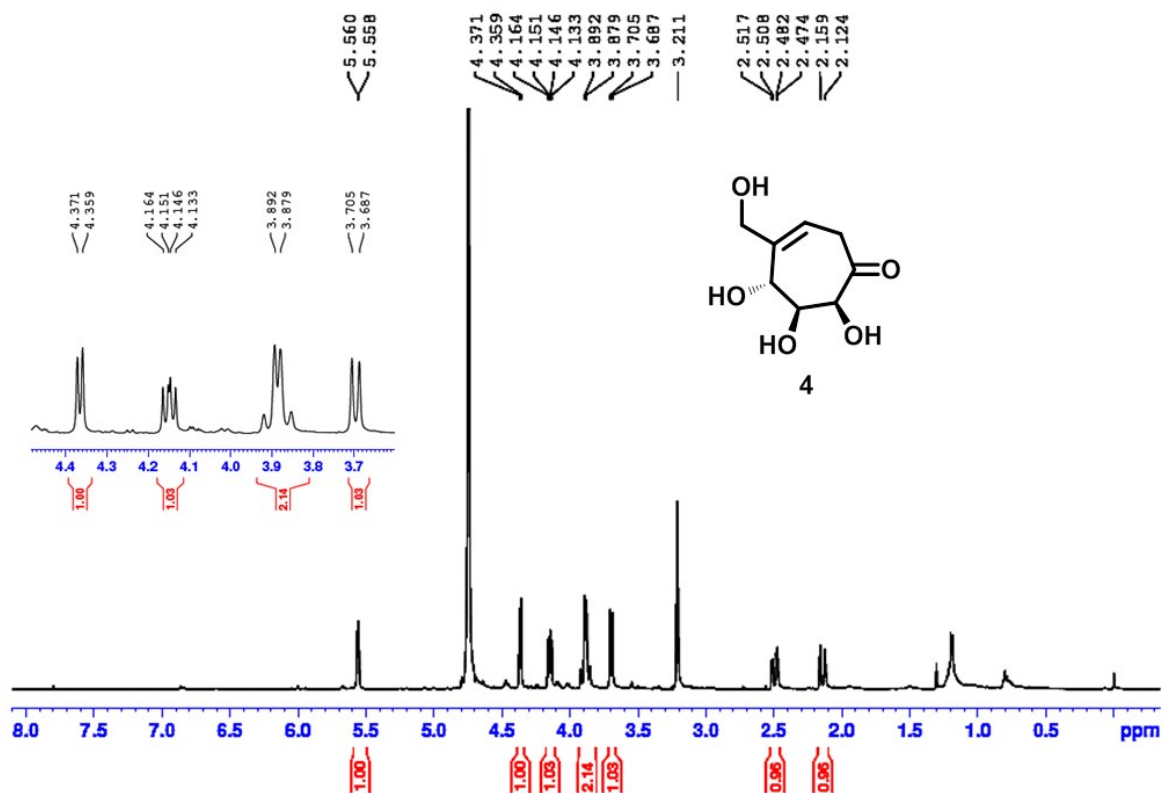

COSY spectrum of compound **4** recorded in CD<sub>3</sub>OD

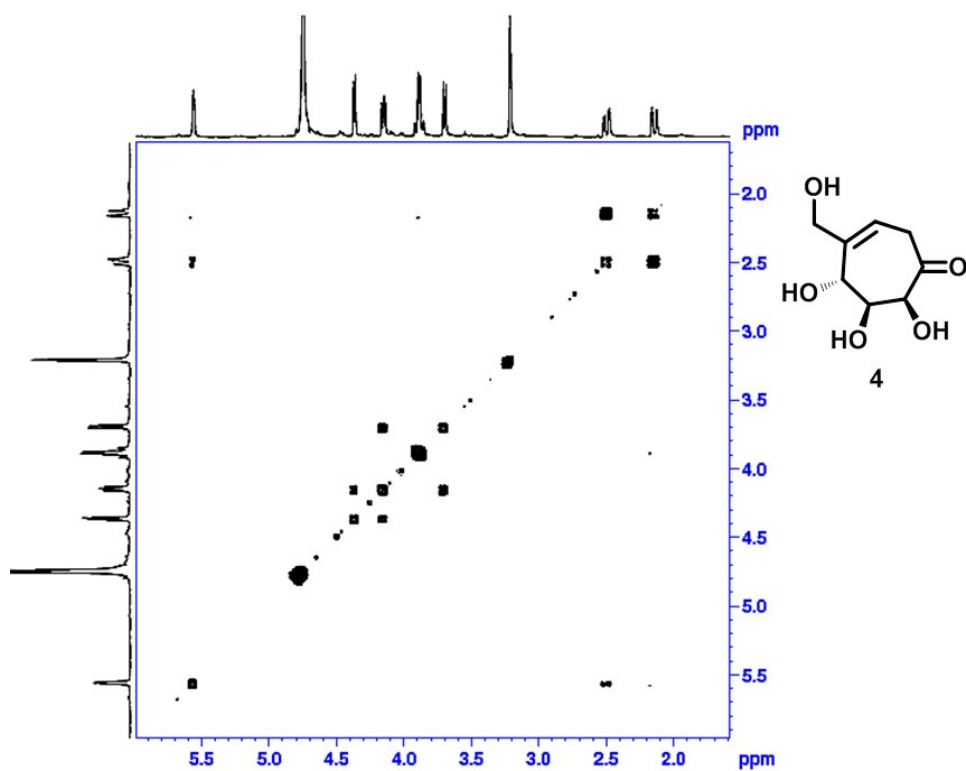

<sup>13</sup>C NMR spectrum of compound **4** recorded in CD<sub>3</sub>OD

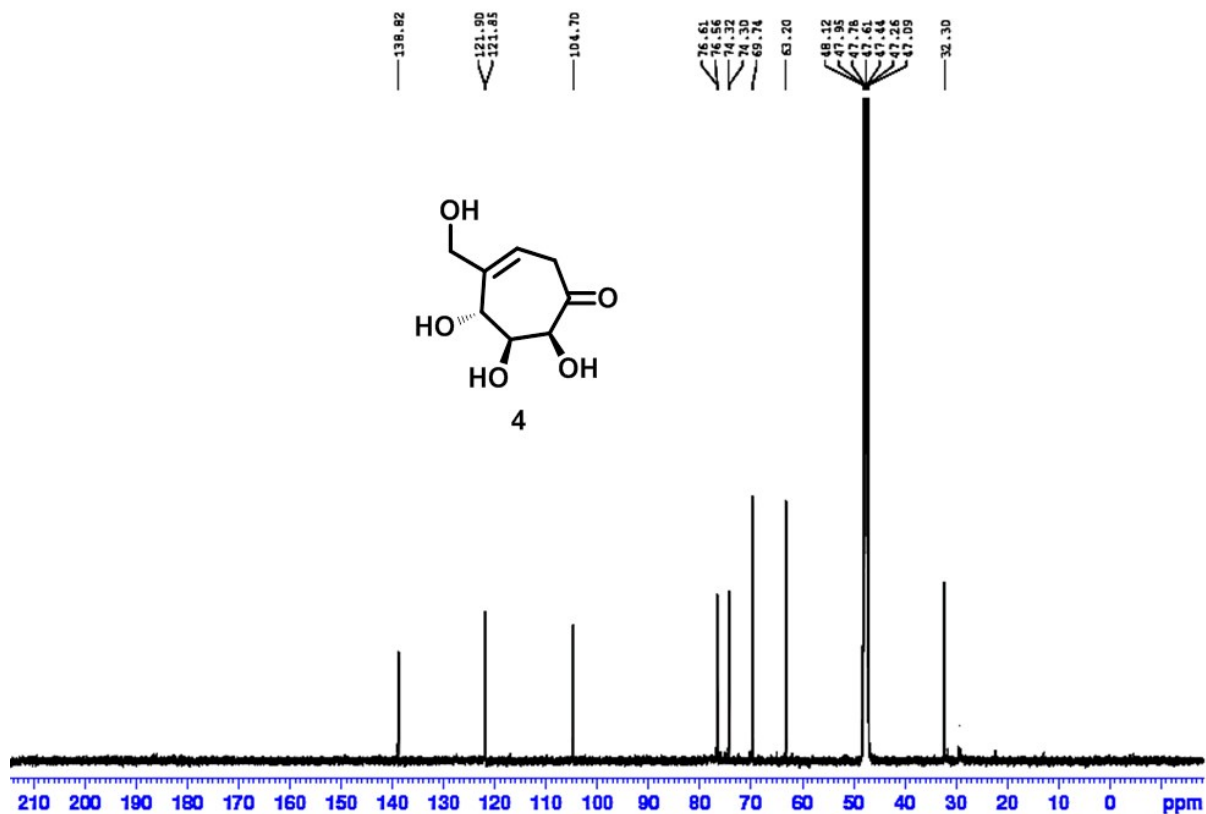

DEPT spectrum of compound **4** recorded in CD<sub>3</sub>OD

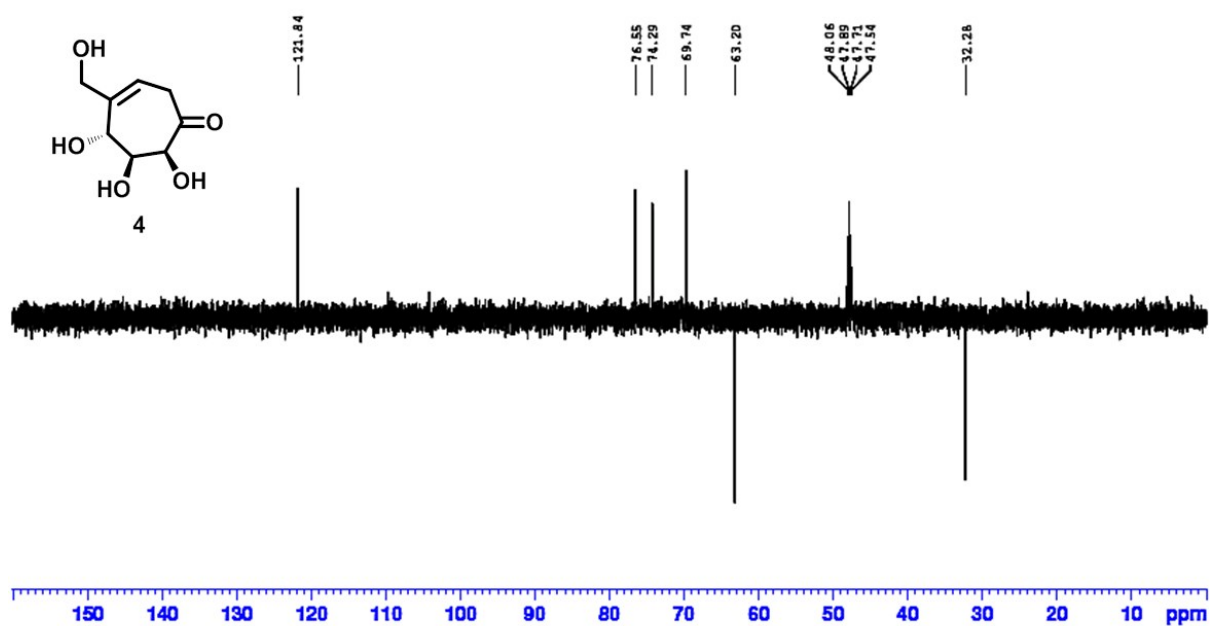

HMQC spectrum of compound **4** recorded in CD<sub>3</sub>OD

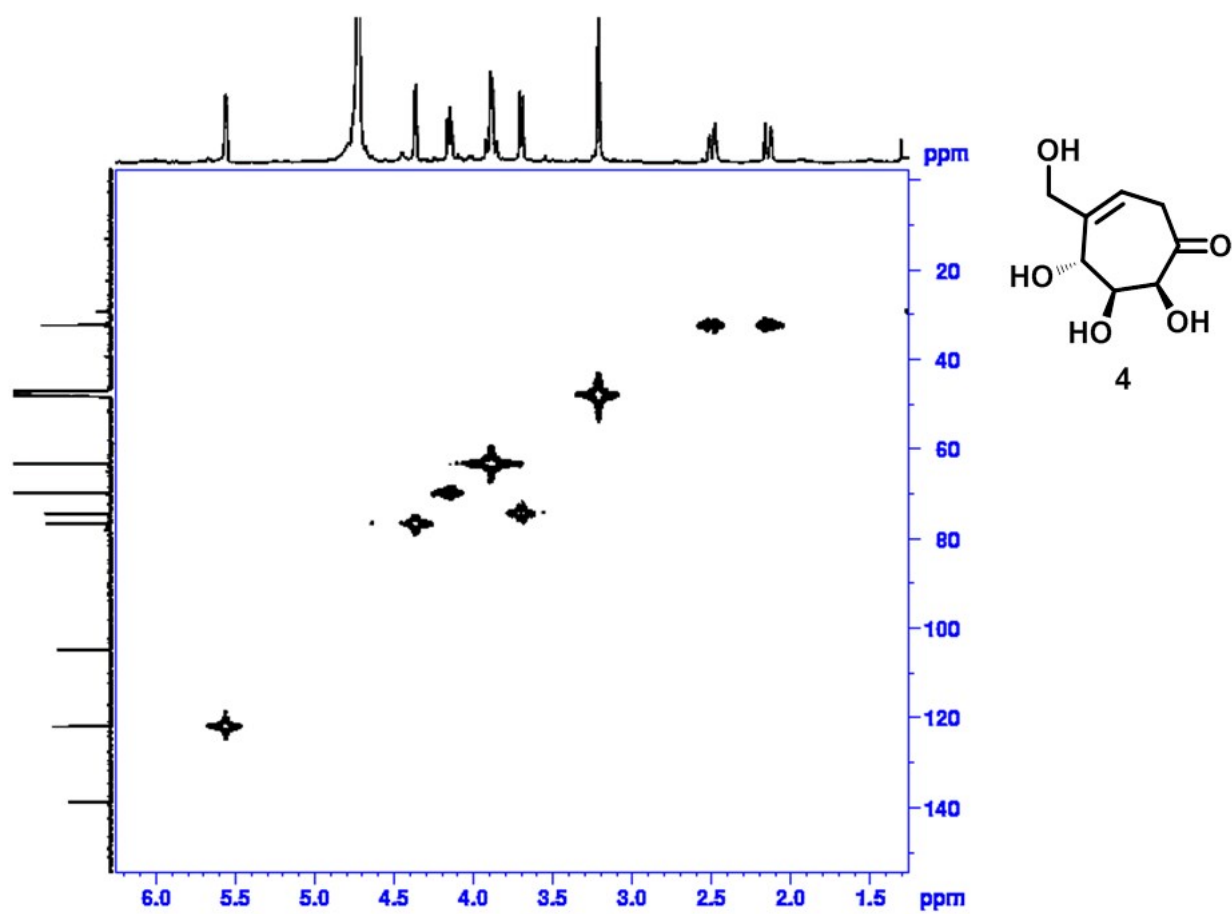



HMBC spectrum of compound **4** recorded in CD<sub>3</sub>OD

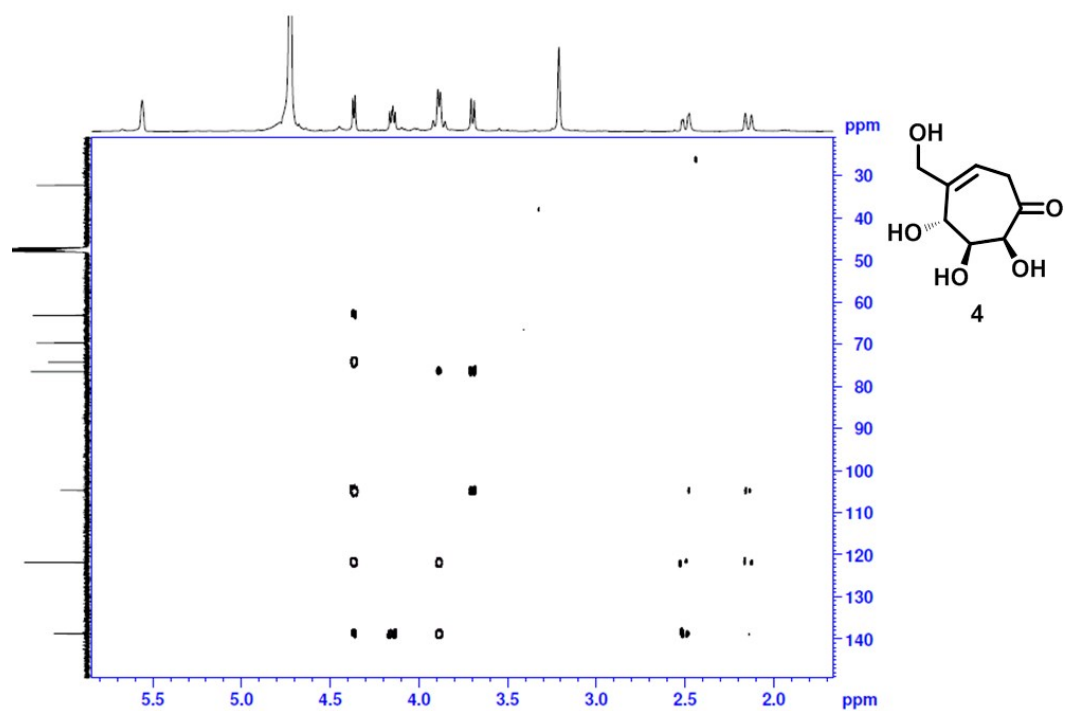

NOESY spectrum of compound **4** recorded in CD<sub>3</sub>OD

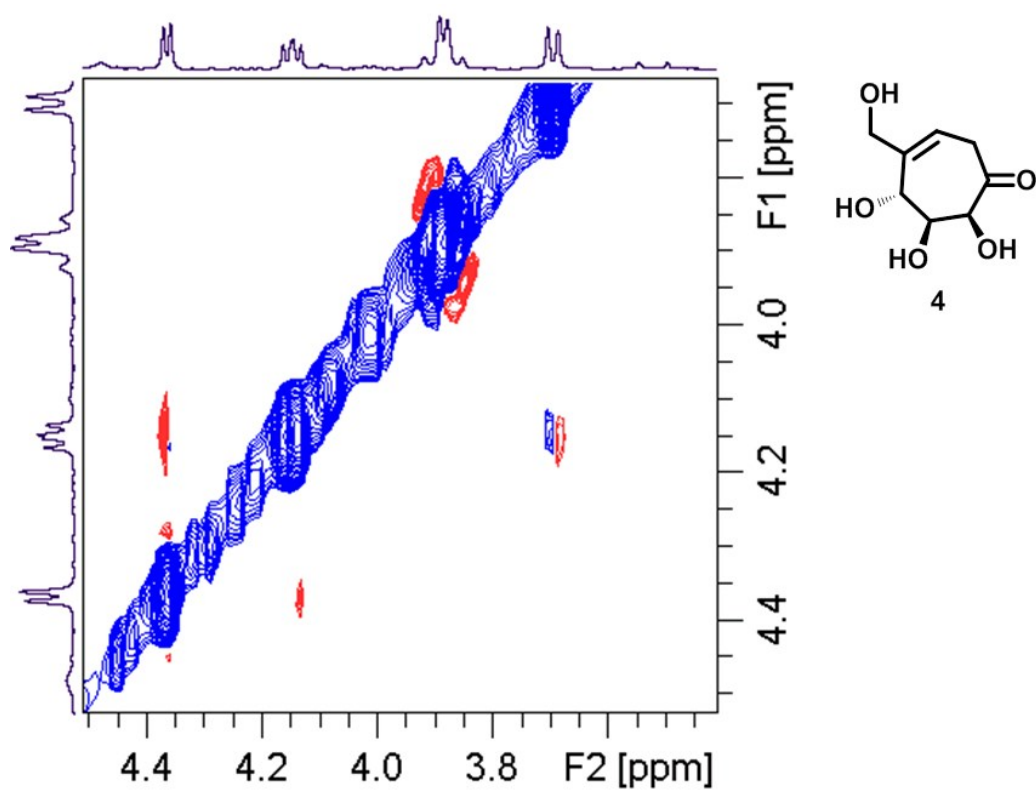

Supplement: d1ra00804h1.pdf [file d1ra00804h1.pdf]
